# Supplementary material for: A murine model of Lyme disease demonstrates that Borrelia burgdorferi colonizes the dura mater and induces inflammation in the central nervous system
Source: PLoS Pathog. 2021 Feb 1;17(2):e1009256. doi: 10.1371/journal.ppat.1009256 (PMC7877756; doi:10.1371/journal.ppat.1009256)
Supplement: S2 Table — (XLSX) [file ppat.1009256.s003.xlsx]

## Sheet: S2_Table
S2 Table. Differential expression gene list in the brain cortex.
gene	baseMean	log2FoldChange	lfcSE	stat	pvalue	padj	UI_cortex_mean	Bb297_cortex_mean
0610005C13Rik	17.9165	0.387501	0.362532	1.06887	0.285127	0.743174	12.0079	15.7814
0610007P14Rik	846.853	-0.0707206	0.0548908	-1.28839	0.197611	0.648594	873.614	835.25
0610009B22Rik	489.654	-0.0582265	0.0974235	-0.597664	0.550064	0.890653	511.783	493.074
0610009L18Rik	95.4015	0.177742	0.171797	1.03461	0.300852	0.755995	67.1964	76.3492
0610009O20Rik	1154.75	0.0798959	0.0573236	1.39377	0.163387	0.603848	1076.78	1139.57
0610010B08Rik	51.3831	0.00405042	0.237413	0.0170607	0.986388	0.998285	63.2431	64.1777
0610010F05Rik	1210.92	-0.125392	0.0583377	-2.14942	0.031601	0.287352	1702.81	1560.49
0610010K14Rik	777.738	-0.0167452	0.0626772	-0.267166	0.789341	0.959361	661.891	656.188
0610011F06Rik	574.306	0.132701	0.087162	1.52246	0.127893	0.544371	560.027	614.049
0610012G03Rik	1315.83	-0.102712	0.0793484	-1.29444	0.195513	0.64618	1549.19	1442.53
0610030E20Rik	806.905	-0.13636	0.0936875	-1.45547	0.145538	0.576293	567.371	515.327
0610031J06Rik	1693.87	0.120342	0.0523108	2.30052	0.021419	0.233381	940.866	1020.58
0610031O16Rik	0.0341367	0	5.20139	0	1	NA	0	0
0610037L13Rik	927.029	-0.0845761	0.0597059	-1.41655	0.156616	0.592568	937.293	882.024
0610038B21Rik	9.83784	-0.404708	0.3788	-1.06839	0.285343	NA	22.4981	16.9977
0610039K10Rik	7.45411	0.40299	0.540933	0.74499	0.456278	NA	4.6187	6.12377
0610040B10Rik	22.5777	0.0882972	0.378153	0.233496	0.815376	0.965951	20.8088	22.2827
0610040F04Rik	6.12901	0.998695	0.53341	1.87229	0.0611671	NA	7.06532	13.9493
0610040J01Rik	101.406	-0.0704969	0.19322	-0.364853	0.715221	0.941341	96.0914	91.377
0610043K17Rik	15.6355	-0.640462	0.438862	-1.45937	0.144463	NA	11.2027	7.49302
1010001N08Rik	1.78884	1.05366	1.58783	0.663585	0.506956	NA	0	0.30183
1100001G20Rik	32.8036	1.03754	1.48899	0.696803	0.485926	0.867093	0.28527	0.586091
1110001J03Rik	388.009	-0.185659	0.141883	-1.30854	0.190691	0.639796	502.899	441.592
1110002L01Rik	83.1883	-0.111009	0.147443	-0.752898	0.451511	0.852123	90.7164	84.3856
1110004E09Rik	810.872	-0.0168851	0.0974398	-0.173287	0.862426	0.974627	929.243	919.618
1110004F10Rik	2225.66	-0.0348764	0.0518726	-0.672347	0.501363	0.872697	2274.58	2221.14
1110006O24Rik	22.4431	0.361712	0.34993	1.03367	0.301291	0.756325	10.8229	14.0189
1110007C09Rik	387.113	0.211321	0.096605	2.18747	0.0287082	0.274901	154.579	180.266
1110008F13Rik	990.337	-0.0431604	0.0498325	-0.866109	0.38643	0.816623	968.396	940.372
1110008L16Rik	212.811	0.116687	0.112012	1.04174	0.297533	0.753401	183.852	199.258
1110008P14Rik	2501.53	-0.256749	0.0845957	-3.03501	0.00240526	0.0627729	5354.55	4479.82
1110012L19Rik	255.392	0.137836	0.127912	1.07759	0.281218	0.740725	200.471	221.134
1110015O18Rik	4.58514	0.454576	0.872313	0.521115	0.602286	NA	6.75708	9.4397
1110017D15Rik	81.7716	0.0262723	0.285346	0.0920717	0.926641	0.988782	66.4209	68.075
1110019D14Rik	45.6968	-0.280061	0.190255	-1.47203	0.141012	0.567557	56.2063	46.4533
1110020A21Rik	22.8227	-0.206145	0.297362	-0.693247	0.488154	0.867992	31.6928	27.4737
1110025L11Rik	0	NA	NA	NA	NA	NA	0	0
1110028F11Rik	2.21778	0.0473251	1.17484	0.0402823	0.967868	NA	1.16269	1.25547
1110028F18Rik	0.735178	0	2.66205	0	1	NA	0	0
1110032A03Rik	434.465	0.103383	0.105014	0.984469	0.324885	0.772679	438.404	471.292
1110032F04Rik	490.31	0.0258299	0.150091	0.172095	0.863363	0.974813	994.489	1011.72
1110034G24Rik	192.723	0.0767024	0.123146	0.622856	0.533379	0.884383	171.989	180.916
1110036E04Rik	0.143124	1.05361	5.20139	0.202563	0.839476	NA	0	0.345606
1110037F02Rik	1666.8	-0.00944724	0.052752	-0.179088	0.857869	0.973497	1448.92	1440.5
1110038B12Rik	205.889	-0.12764	0.106854	-1.19453	0.232272	0.695511	183.228	166.487
1110038F14Rik	555.736	-0.0658741	0.0888441	-0.741458	0.458416	0.855372	461.5	440.555
1110046J04Rik	45.5505	-0.211031	0.201796	-1.04577	0.295669	0.752422	64.1248	56.3926
1110051M20Rik	1881.64	0.0623977	0.0639421	0.975847	0.32914	0.775859	2051.46	2144.39
1110054M08Rik	60.9156	-0.138068	0.204062	-0.6766	0.49866	0.871456	47.1595	43.471
1110057K04Rik	1067.75	-0.116296	0.0662832	-1.75453	0.0793392	0.450573	1088.92	1003.87
1110058L19Rik	432.368	0.0676217	0.0909957	0.743131	0.457402	0.855278	426.84	447.635
1110059E24Rik	483.637	-0.00621433	0.0967057	-0.0642602	0.948763	0.991811	435.83	435.606
1110059G10Rik	440.433	-0.00596123	0.112184	-0.0531381	0.957622	0.992623	417.447	415.594
1110065P20Rik	695.901	0.00657602	0.0890076	0.0738815	0.941105	0.99076	784.531	787.469
1190002F15Rik	12.1138	-0.479561	0.944123	-0.507944	0.611493	NA	1.60154	1.13278
1190002N15Rik	1471.83	0.135298	0.115615	1.17025	0.241901	0.706681	1608.59	1766.83
1190003K10Rik	0.65894	3.04334	2.04106	1.49106	0.135946	NA	0.264824	2.43202
1190005I06Rik	156.505	0.6213	0.15118	4.10966	3.96236e-05	0.0027978	118.315	182.025
1190007I07Rik	98.6083	0.00859119	0.132569	0.0648053	0.948329	0.991741	113.504	113.808
1200014J11Rik	806.25	-0.0519576	0.0612139	-0.848787	0.396	0.821967	644.867	620.998
1300002E11Rik	232.379	-0.0818866	0.109717	-0.746346	0.455458	0.853771	227.039	214.596
1300002K09Rik	3.90773	-0.387043	1.48538	-0.260568	0.794426	NA	0.491327	0.240484
1300017J02Rik	7.09795	-0.107757	0.732511	-0.147107	0.883048	NA	3.29014	2.8035
1500004A13Rik	523.723	-0.0669634	0.115814	-0.578198	0.56313	0.894859	757.643	721.582
1500009C09Rik	1374.58	0.171889	0.375696	0.457522	0.647296	0.921394	1962.66	2211.03
1500009L16Rik	289.905	0.080119	0.0897205	0.892985	0.371865	0.806249	371.162	393.731
1500011B03Rik	2088.79	0.0264005	0.109834	0.240368	0.810045	0.96499	2860.99	2913.93
1500011K16Rik	756.965	-0.0848941	0.0974725	-0.870954	0.383779	0.814703	878.342	827.683
1500012F01Rik	528.927	0.221099	0.131164	1.68567	0.0918587	0.478075	466.755	544.723
1500012K07Rik	6.48248	0.732809	0.694444	1.05525	0.291313	NA	7.26352	11.8921
1500015A07Rik	131.238	-0.174727	0.142895	-1.22276	0.221419	0.682711	123.982	109.341
1500015L24Rik	5.35859	-1.19953	0.684134	-1.75335	0.079542	NA	9.99542	4.15482
1500015O10Rik	2645.51	0.13105	0.349272	0.37521	0.707504	0.938416	39.478	43.2567
1500017E21Rik	6.37494	-0.03298	0.622489	-0.0529809	0.957747	NA	6.78006	6.57417
1600002D24Rik	0.359361	0	4.56436	0	1	NA	0	0
1600002H07Rik	431.429	0.0116426	0.0953715	0.122077	0.902838	0.983127	271.142	274.921
1600002K03Rik	137.069	-0.205663	0.15246	-1.34896	0.177349	0.625949	92.4981	79.4846
1600010M07Rik	11.9693	-0.904507	1.04055	-0.869255	0.384708	NA	1.6942	0.830946
1600012H06Rik	681.77	-0.0185096	0.0684805	-0.27029	0.786937	0.959308	515.876	510.02
1600014C10Rik	910.922	0.128271	0.0697974	1.83777	0.0660966	0.416021	801.974	878.252
1600014C23Rik	2.04023	-0.442217	0.896881	-0.493061	0.621969	NA	3.72085	2.82577
1600014K23Rik	0.0971525	0	5.20139	0	1	NA	0	0
1600015I10Rik	1.04358	0	1.88617	0	1	NA	0	0
1600016N20Rik	20.1464	1.32949	0.740717	1.79487	0.0726736	0.431775	1.49257	3.72252
1600019K03Rik	0.106569	0	5.20139	0	1	NA	0	0
1600020E01Rik	183.756	-0.0136589	0.138811	-0.0983997	0.921615	0.987918	137.267	135.498
1600023N17Rik	11.0363	0.465498	0.448449	1.03802	0.299262	NA	10.6579	14.5394
1600025M17Rik	0	NA	NA	NA	NA	NA	0	0
1600027J07Rik	0.464783	1.05366	2.45397	0.429369	0.667655	NA	0	0.345606
1600029I14Rik	2.66224	-1.68304	1.40963	-1.19396	0.232495	NA	1.16898	0.345606
1600029O15Rik	60.1625	0.744271	0.38452	1.93558	0.0529186	0.373917	38.0533	64.2234
1700001C02Rik	10.2914	-0.380547	1.13506	-0.335267	0.737423	NA	1.12437	0.953638
1700001C19Rik	3.69102	0.383891	1.30437	0.294313	0.768519	NA	0.679508	1.04556
1700001D01Rik	0.67044	0.944251	2.37692	0.397258	0.691178	NA	0.28527	0.480969
1700001F09Rik	0.778711	-1.70506	2.02648	-0.841389	0.40013	NA	1.20916	0.240484
1700001G11Rik	8.94824	-0.686398	0.58414	-1.17506	0.239972	NA	9.36654	5.90086
1700001G17Rik	11.6884	-0.273903	0.39201	-0.698713	0.484731	NA	14.3653	11.8798
1700001J03Rik	2.98475	-0.114292	0.99013	-0.115431	0.908103	NA	1.73509	1.73677
1700001J11Rik	1.55179	1.62064	1.40347	1.15474	0.248197	NA	0.550094	1.52216
1700001K19Rik	20.8564	0.233162	0.335535	0.694897	0.48712	0.867447	18.5354	21.5464
1700001K23Rik	3.73629	2.58002	1.07558	2.39873	0.0164521	NA	0.738275	4.43994
1700001L05Rik	179.66	0.322453	0.165956	1.943	0.0520159	0.371525	166.568	209.047
1700001L19Rik	186.512	-0.128708	0.128767	-0.999543	0.317532	0.769157	364.092	332.722
1700001O22Rik	129.422	0.00244949	0.276058	0.00887313	0.99292	0.999499	225.389	225.401
1700001P01Rik	7.55526	0.177322	0.527292	0.336289	0.736653	NA	10.7325	11.9274
1700003C15Rik	0.103677	1.05359	5.20139	0.20256	0.839479	NA	0	0.240484
1700003D09Rik	23.368	0.244968	0.365559	0.670117	0.502783	0.872861	22.6626	27.1547
1700003E16Rik	685.228	0.0409725	0.0972717	0.421218	0.673596	0.930425	992.584	1020.72
1700003E24Rik	0	NA	NA	NA	NA	NA	0	0
1700003F12Rik	52.8458	-0.0365634	0.191142	-0.191289	0.848299	0.971992	90.9048	87.4339
1700003G13Rik	0	NA	NA	NA	NA	NA	0	0
1700003G18Rik	1.5379	-1.61458	1.39667	-1.15602	0.247673	NA	1.76741	0.586091
1700003H04Rik	0	NA	NA	NA	NA	NA	0	0
1700003L19Rik	1.22855	0.77018	1.18327	0.650893	0.515115	NA	1.40964	2.43202
1700003M02Rik	79.2193	-0.108366	0.231546	-0.46801	0.639777	0.918785	76.0249	70.4481
1700003M07Rik	408.306	0.0161326	0.158627	0.101701	0.918994	0.987488	483.433	488.843
1700003P14Rik	0	NA	NA	NA	NA	NA	0	0
1700006A11Rik	0	NA	NA	NA	NA	NA	0	0
1700006E09Rik	0.150158	1.0536	5.20139	0.202562	0.839478	NA	0	0.345606
1700006F04Rik	0.424195	0.796639	2.7335	0.291435	0.770719	NA	0.550094	0.905491
1700006H21Rik	0.128154	0	5.20139	0	1	NA	0	0
1700007B14Rik	1.79966	-0.000134265	1.04891	-0.000128004	0.999898	NA	1.86264	1.99046
1700007F19Rik	32.5695	-0.103709	0.334187	-0.310332	0.756309	0.952524	26.9729	24.9148
1700007G11Rik	25.7603	-0.0589929	0.34801	-0.169515	0.865392	0.974813	19.5051	18.8431
1700007J10Rik	27.9732	-0.0696856	0.307558	-0.226577	0.820753	0.966434	24.3085	23.3755
1700007K09Rik	1.97769	-0.780518	1.06633	-0.731966	0.464189	NA	3.06364	1.67509
1700007K13Rik	110.635	-0.522213	0.263815	-1.97946	0.0477637	0.358115	89.5247	62.1112
1700007L15Rik	13.5747	0.366421	0.447407	0.818986	0.412794	NA	8.21572	10.9886
1700007P06Rik	19.1753	-0.182481	0.28984	-0.629591	0.528962	0.881986	44.3541	38.4202
1700008F21Rik	11.2716	0.430554	0.428984	1.00366	0.315543	NA	14.0053	18.8118
1700008I05Rik	0.304564	-0.389002	3.92476	-0.0991149	0.921047	NA	0.204198	0
1700008J07Rik	208.86	0.0738491	0.109266	0.675867	0.499125	0.871456	187.586	198.708
1700008K24Rik	3.35077	-1.07744	0.706084	-1.52594	0.127024	NA	7.08164	3.447
1700008O03Rik	136.655	-0.0584969	0.123709	-0.472859	0.636314	0.917754	191.853	183.17
1700008P02Rik	0.0866172	0	5.20139	0	1	NA	0	0
1700009C05Rik	0.620469	1.11406	2.66334	0.418295	0.675732	NA	0.226503	0.647437
1700009J07Rik	1.70457	1.0329	1.55785	0.663028	0.507313	NA	0.28527	0.542315
1700009N14Rik	0	NA	NA	NA	NA	NA	0	0
1700009P17Rik	66.1254	0.27793	0.462958	0.600335	0.548283	0.88979	8.31864	10.0214
1700010B08Rik	0.0928216	1.05359	5.20139	0.20256	0.839479	NA	0	0.349977
1700010D01Rik	0	NA	NA	NA	NA	NA	0	0
1700010I02Rik	0.100047	0	5.20139	0	1	NA	0	0
1700010I14Rik	27.1724	0.462592	0.359077	1.28828	0.197648	0.648594	12.6809	17.9648
1700010J16Rik	0.230588	-0.389002	4.17762	-0.0931155	0.925812	NA	0.28527	0
1700010K23Rik	0.149935	1.0536	5.20139	0.202562	0.839478	NA	0	0.345606
1700011A15Rik	0.16227	-1.25509	5.19099	-0.241783	0.808948	NA	0.550094	0
1700011B04Rik	0.192635	0	5.20139	0	1	NA	0	0
1700011E24Rik	1.73805	-0.159368	1.18336	-0.134674	0.89287	NA	1.39105	1.3868
1700011H14Rik	0.331157	1.36074	2.83143	0.480585	0.630812	NA	0.204198	0.721453
1700011I03Rik	3.82199	0.464109	0.818915	0.566736	0.570893	NA	2.30306	3.1144
1700011L22Rik	0.67003	2.64553	1.81498	1.45761	0.144949	NA	0	1.06706
1700011M02Rik	1.95806	0.504317	0.869474	0.580025	0.561898	NA	2.77652	4.0593
1700012A03Rik	0.29598	1.05365	2.77847	0.379219	0.704526	NA	0	0.240484
1700012B07Rik	0.58304	0	2.60302	0	1	NA	0	0
1700012B09Rik	18.2816	-0.80394	0.896772	-0.896482	0.369995	0.805413	3.22137	1.82399
1700012D01Rik	28.9913	0.386489	0.317649	1.21672	0.223712	0.684159	15.4744	20.5933
1700012D14Rik	18.3361	-0.55388	0.349268	-1.58583	0.112778	0.51804	19.7334	13.433
1700012I11Rik	0.270989	1.05365	3.39051	0.310763	0.755981	NA	0	0.349977
1700012L04Rik	1.03336	-0.89396	1.60554	-0.556796	0.577667	NA	1.04329	0.590461
1700012P22Rik	1.40865	0	1.89301	0	1	NA	0	0
1700013D24Rik	0.154165	0	5.20139	0	1	NA	0	0
1700013F07Rik	28.4847	0.400886	0.346638	1.1565	0.247477	0.711712	18.9409	25.5402
1700013G24Rik	0.0724456	0	5.20139	0	1	NA	0	0
1700013H16Rik	0.487658	1.46684	2.43944	0.6013	0.54764	NA	0.204198	0.782799
1700015E13Rik	11.7427	-0.371423	0.48297	-0.76904	0.441869	NA	11.5832	9.31787
1700015F17Rik	1.91432	0.0352787	0.996713	0.0353951	0.971765	NA	3.36609	3.52136
1700015G11Rik	0.13746	0	5.20139	0	1	NA	0	0
1700016C15Rik	2.44641	-0.879144	1.17457	-0.748481	0.45417	NA	2.22198	1.18092
1700016D06Rik	0.536122	1.84265	2.54405	0.724299	0.468882	NA	0.264824	1.02328
1700016G22Rik	0.360038	-0.389005	3.35013	-0.116116	0.907561	NA	0.204198	0
1700016H13Rik	1.74083	-0.699973	1.42337	-0.491771	0.622881	NA	2.48752	1.50915
1700016K19Rik	41.4207	-0.151073	0.305484	-0.494535	0.620929	0.914382	54.3443	49.0384
1700016L04Rik	1.88958	0.528391	1.23544	0.427694	0.668874	NA	1.67818	2.43202
1700016L21Rik	0.0168961	0	5.20139	0	1	NA	0	0
1700016P04Rik	0	NA	NA	NA	NA	NA	0	0
1700017B05Rik	670.26	0.145469	0.0980018	1.48435	0.137716	0.561858	368.166	404.896
1700017D01Rik	0.452864	2.72445	3.66221	0.743936	0.456915	NA	0	1.18092
1700017G19Rik	9.34071	-1.35316	1.31006	-1.0329	0.301651	NA	0.839097	0.240484
1700017J07Rik	1.14269	-1.17799	2.12552	-0.554214	0.579433	NA	0.529648	0
1700017N19Rik	0.202888	1.05361	5.19377	0.202861	0.839244	NA	0	0.240484
1700018A04Rik	2.59504	-0.222016	0.898011	-0.247231	0.804729	NA	2.8167	2.4758
1700018B08Rik	0.365275	-1.12616	3.10261	-0.362971	0.716626	NA	1.22774	0.480969
1700018B24Rik	0	NA	NA	NA	NA	NA	0	0
1700018C11Rik	0.995166	-0.250845	1.59807	-0.156967	0.875271	NA	1.79828	1.47838
1700018F24Rik	0	NA	NA	NA	NA	NA	0	0
1700018G05Rik	8.54806	0.076769	0.444385	0.172753	0.862845	NA	9.99613	10.3487
1700018L02Rik	32.0579	-0.287508	0.276216	-1.04088	0.29793	0.753471	28.2205	23.0558
1700019A02Rik	4.15255	-0.526379	0.835571	-0.629963	0.528719	NA	5.85058	4.05047
1700019B03Rik	3.76252	-0.200281	0.762685	-0.2626	0.792859	NA	3.57612	2.99617
1700019B21Rik	0.168317	0	5.20139	0	1	NA	0	0
1700019D03Rik	105.671	0.0021009	0.190549	0.0110255	0.991203	0.999499	188.007	187.944
1700019E08Rik	0	NA	NA	NA	NA	NA	0	0
1700019G17Rik	236.412	0.133257	0.120631	1.10467	0.269301	0.728651	267.723	294.072
1700019G24Rik	1.25355	-0.637785	1.58702	-0.401875	0.687776	NA	0.978935	0.647437
1700019L03Rik	62.6022	-0.0405665	0.205844	-0.197074	0.84377	0.970914	64.9054	62.5656
1700019M22Rik	0.0459266	0	5.20139	0	1	NA	0	0
1700019N19Rik	2.15135	0.321661	0.958676	0.335526	0.737228	NA	3.24367	3.88813
1700019O17Rik	0.1136	-0.389001	5.20139	-0.0747878	0.940384	NA	0.204198	0
1700020A23Rik	7.3712	-0.00413543	0.455788	-0.00907314	0.992761	NA	11.2169	11.0401
1700020D05Rik	34.923	-0.261865	0.260488	-1.00529	0.314758	0.767724	40.8113	34.3104
1700020G17Rik	0.313853	0	3.97209	0	1	NA	0	0
1700020I14Rik	2098.03	-0.110942	0.0687266	-1.61425	0.106473	0.506532	3116.56	2884.86
1700020L24Rik	70.0695	0.463003	0.234289	1.97621	0.0481314	0.358897	24.8609	33.4173
1700020M21Rik	0.380039	0	3.89032	0	1	NA	0	0
1700020N01Rik	0.405953	-0.511823	3.26315	-0.156849	0.875364	NA	0.570539	0.349977
1700020N15Rik	0.046167	0	5.20139	0	1	NA	0	0
1700020N18Rik	21.5018	0.104829	0.261635	0.40067	0.688663	0.934425	33.1303	35.6395
1700021F05Rik	448.086	-0.156656	0.0922368	-1.69841	0.0894298	0.473727	551.744	494.334
1700021F07Rik	0	NA	NA	NA	NA	NA	0	0
1700021K19Rik	2587.83	-0.00329434	0.044606	-0.0738542	0.941126	0.99076	3242.83	3233.01
1700021N21Rik	9.58029	0.0840645	0.465677	0.180521	0.856743	NA	19.122	20.7391
1700022A21Rik	0.0344921	0	5.20139	0	1	NA	0	0
1700022A22Rik	0.110015	0	5.20139	0	1	NA	0	0
1700022E09Rik	0.138281	0	5.20139	0	1	NA	0	0
1700022H16Rik	0.0586584	0	5.20139	0	1	NA	0	0
1700022I11Rik	2.63211	-0.243112	0.882977	-0.275332	0.783061	NA	2.16765	1.88971
1700023C21Rik	1.24809	-0.149315	1.646	-0.0907141	0.92772	NA	1.0593	0.940439
1700023E05Rik	10.0594	-0.0709267	0.482148	-0.147106	0.883049	NA	9.28132	8.69071
1700023F02Rik	0.409963	1.6579	2.35584	0.703741	0.481594	NA	0.204198	0.940439
1700023F06Rik	48.7784	0.06682	0.221141	0.30216	0.76253	0.953679	54.1441	56.7792
1700023L04Rik	9.00318	0.982651	0.728338	1.34917	0.177283	NA	2.32538	4.52673
1700024B18Rik	1.1512	2.0544	1.63131	1.25935	0.207904	NA	0.28527	1.2379
1700024F13Rik	6.21532	-0.179246	0.486611	-0.368355	0.712609	NA	9.62047	8.29303
1700024G13Rik	11.0919	1.63191	1.4643	1.11446	0.26508	NA	0.204198	0.940439
1700024P04Rik	0.0905979	0	5.20139	0	1	NA	0	0
1700024P16Rik	55.588	0.270302	0.257379	1.05021	0.293623	0.750726	50.5312	61.58
1700025B11Rik	0.542633	0	3.30091	0	1	NA	0	0
1700025C18Rik	0	NA	NA	NA	NA	NA	0	0
1700025F22Rik	0.0561058	0	5.20139	0	1	NA	0	0
1700025F24Rik	10.6032	0.114202	0.493484	0.23142	0.816988	NA	12.0623	13.3233
1700025G04Rik	2085.21	-0.0602991	0.0417001	-1.44602	0.148172	0.579425	2723.74	2611.33
1700025K24Rik	0.164204	1.21412	5.1909	0.233893	0.815068	NA	0.28527	0.699954
1700025M24Rik	0.495179	1.05366	3.71215	0.28384	0.776533	NA	0	0.349977
1700025N23Rik	1.70302	-0.179392	1.61889	-0.110812	0.911766	NA	0.612594	0.586091
1700026D08Rik	41.3711	0.206904	0.467364	0.442704	0.65798	0.925672	7.40082	8.74813
1700026D11Rik	0.580765	-1.07073	2.26715	-0.47228	0.636727	NA	0.430701	0
1700026F02Rik	0.0802583	-0.389005	5.20139	-0.0747886	0.940383	NA	0.204198	0
1700026L06Rik	26.0088	0.376636	0.726004	0.518779	0.603915	0.9101	2.20598	3.23273
1700027A15Rik	0	NA	NA	NA	NA	NA	0	0
1700027F09Rik	0.150095	1.0536	5.20139	0.202562	0.839478	NA	0	0.240484
1700027H10Rik	7.0986	0.107626	0.627494	0.171517	0.863817	NA	11.9219	12.6888
1700027I24Rik	0.0836771	-0.389015	5.20139	-0.0747904	0.940381	NA	0.226503	0
1700027J07Rik	1.18894	0	1.98556	0	1	NA	0	0
1700028B04Rik	0.836715	1.03188	1.50613	0.685118	0.493269	NA	0.776597	1.53973
1700028D13Rik	0.359757	0	4.74988	0	1	NA	0	0
1700028E10Rik	11.5076	-0.461938	0.457307	-1.01013	0.312434	NA	13.6373	9.93368
1700028I16Rik	1.76556	-0.193829	1.30594	-0.14842	0.882011	NA	1.02354	0.721453
1700028J19Rik	45.6528	-0.153201	0.242195	-0.632554	0.527025	0.881395	61.0797	54.6402
1700028K03Rik	36.1108	-0.11889	0.25393	-0.468198	0.639643	0.918785	42.5482	38.9027
1700028M03Rik	0.64229	0	3.48714	0	1	NA	0	0
1700028P14Rik	32.9862	-0.528419	0.324766	-1.62708	0.10372	0.499622	41.208	28.185
1700028P15Rik	0	NA	NA	NA	NA	NA	0	0
1700029B22Rik	0.0532845	0	5.20139	0	1	NA	0	0
1700029F12Rik	0.160323	2.44294	5.16483	0.472995	0.636216	NA	0	0.961937
1700029H14Rik	2.10012	1.25287	1.37728	0.909673	0.362995	NA	0.754292	1.68829
1700029I15Rik	17.1271	-0.0114169	0.394445	-0.0289443	0.976909	0.996678	12.8842	12.934
1700029J03Rik	0.111614	1.05359	5.20139	0.20256	0.839479	NA	0	0.349977
1700029J07Rik	182.632	0.082092	0.164672	0.498518	0.618119	0.912631	100.612	107.591
1700029M20Rik	0.456407	1.10251	2.21071	0.498715	0.61798	NA	0.264824	0.651807
1700029N11Rik	0.305828	0	4.84353	0	1	NA	0	0
1700029P11Rik	0.233761	0	4.15315	0	1	NA	0	0
1700030A11Rik	0.290049	-1.28072	3.91506	-0.327127	0.743572	NA	0.897864	0.345606
1700030C10Rik	5.67814	-0.213268	0.730908	-0.291786	0.770451	NA	3.3043	2.82577
1700030F04Rik	0.71567	1.05355	1.69453	0.621739	0.534113	NA	0.897864	1.93785
1700030F18Rik	1.29245	-0.389024	1.80666	-0.215327	0.829512	NA	0.264824	0
1700030J22Rik	291.112	0.0421979	0.098447	0.428636	0.668188	0.92962	396.589	408.932
1700030K09Rik	224.66	-0.0577889	0.0983522	-0.587571	0.55682	0.892267	196.237	189.007
1700030L20Rik	0.445164	-1.8035	2.10858	-0.855314	0.392377	NA	0.814918	0
1700030M09Rik	0.644056	-1.39115	2.29665	-0.605728	0.544696	NA	0.978935	0.30183
1700030N03Rik	0	NA	NA	NA	NA	NA	0	0
1700030O20Rik	0.327326	1.05363	4.74179	0.222202	0.824157	NA	0	0.240484
1700031A10Rik	1.006	1.45063	1.60248	0.905235	0.365341	NA	0.738275	1.95935
1700031F05Rik	0.867197	-1.20654	2.13881	-0.564117	0.572675	NA	0.816792	0.345606
1700031M16Rik	0.237056	0.499551	5.18534	0.096339	0.923251	NA	0.453005	0.691213
1700031P21Rik	0.10939	0	5.20139	0	1	NA	0	0
1700034E13Rik	0.240014	0	5.03681	0	1	NA	0	0
1700034F02Rik	3.56557	0.0859532	0.784823	0.109519	0.912791	NA	3.54269	3.87983
1700034G24Rik	8.18754	-0.0333023	0.505922	-0.0658251	0.947517	NA	10.2182	10.0693
1700034H15Rik	97.5241	0.227226	0.134071	1.69482	0.0901088	0.47465	121.317	141.461
1700034I23Rik	5.55684	0.73313	0.67169	1.09147	0.275066	NA	4.89654	7.85497
1700034J05Rik	0.146774	1.05361	5.20139	0.202564	0.839476	NA	0	0.240484
1700034K08Rik	0.34855	0	3.25282	0	1	NA	0	0
1700034O15Rik	0.0801393	-0.389014	5.20139	-0.0747903	0.940382	NA	0.28527	0
1700034P13Rik	2.56765	0.539247	0.922473	0.584567	0.558839	NA	2.68984	3.58629
1700036G14Rik	0.0974219	-0.389015	5.20139	-0.0747904	0.940381	NA	0.264824	0
1700037C18Rik	78.8686	0.12308	0.166792	0.737926	0.46056	0.855937	98.4628	107.76
1700037H04Rik	1074.83	0.0378849	0.0770157	0.491911	0.622782	0.914788	1422.2	1461.16
1700039E15Rik	1.63437	1.87156	1.46759	1.27527	0.202215	NA	1.4059	4.96076
1700039E22Rik	0.460443	0	2.58439	0	1	NA	0	0
1700040L02Rik	49.4782	0.155233	0.281742	0.550976	0.58165	0.902344	33.0915	36.1814
1700041C23Rik	0.0729015	0	5.20139	0	1	NA	0	0
1700041M19Rik	0.0583295	1.05358	5.20139	0.202558	0.839481	NA	0	0.349977
1700042B14Rik	0.155941	0	5.20139	0	1	NA	0	0
1700042G07Rik	0.391748	0.158995	3.22787	0.0492571	0.960714	NA	0.529648	0.586091
1700042G15Rik	0.521683	0.209433	3.70481	0.05653	0.95492	NA	0.453005	0.480969
1700042O10Rik	53.1839	-0.389019	1.45526	-0.267319	0.789223	0.959361	0.28527	0
1700044C05Rik	0.219899	0	5.20139	0	1	NA	0	0
1700044K03Rik	0	NA	NA	NA	NA	NA	0	0
1700045H11Rik	0.610081	0	2.41282	0	1	NA	0	0
1700046C09Rik	0.034033	-0.389024	5.20139	-0.0747923	0.94038	NA	0.204198	0
1700047A11Rik	1.37992	-2.68838	1.65148	-1.62786	0.103555	NA	1.45425	0
1700047E10Rik	0.277799	-0.561611	4.92042	-0.114139	0.909128	NA	0.570539	0.349977
1700047G03Rik	0.771308	-1.43869	2.00199	-0.718628	0.47237	NA	1.02098	0.240484
1700047I17Rik2	0	NA	NA	NA	NA	NA	0	0
1700047L14Rik	0.0532845	0	5.20139	0	1	NA	0	0
1700047M11Rik	73.4291	-0.277144	0.201291	-1.37684	0.168563	0.611529	110.569	90.6199
1700048M11Rik	13.9188	-0.0435595	0.43518	-0.100095	0.920269	NA	10.7918	10.9399
1700048O20Rik	138.571	-0.236902	0.254777	-0.929842	0.352453	0.791556	211.735	179.586
1700049E15Rik	0.608237	2.48263	1.99008	1.2475	0.212213	NA	0	1.04993
1700049E22Rik	0.474826	0.332309	2.42425	0.137077	0.89097	NA	0.264824	0.349977
1700049G17Rik	258.511	-0.205053	0.12041	-1.70296	0.0885758	0.471432	267.091	232.525
1700049L16Rik	0.0293292	0	5.20139	0	1	NA	0	0
1700051A21Rik	4.45253	0.242102	0.697328	0.347185	0.728452	NA	9.20764	10.6988
1700052I22Rik	0.152921	0	5.20139	0	1	NA	0	0
1700052K11Rik	284.292	0.118224	0.133148	0.887915	0.374587	0.808748	281.961	306.93
1700052N19Rik	567.472	0.0748194	0.0797941	0.937655	0.348422	0.79082	589.29	621.97
1700054A03Rik	1.18026	1.16187	1.09062	1.06533	0.286727	NA	1.73695	3.92831
1700054K19Rik	0	NA	NA	NA	NA	NA	0	0
1700054M17Rik	0.292049	0.332298	3.95167	0.0840904	0.932985	NA	0.226503	0.345606
1700054O13Rik	0.100418	0	5.20139	0	1	NA	0	0
1700055C04Rik	0	NA	NA	NA	NA	NA	0	0
1700055N04Rik	2.6034	-0.772532	0.93886	-0.822841	0.410599	NA	2.49754	1.5309
1700056E22Rik	7.10668	0.186603	0.722098	0.258418	0.796085	NA	2.55374	2.86921
1700057G04Rik	0.833863	1.05366	1.81954	0.579081	0.562534	NA	0	0.345606
1700057H15Rik	1.32811	-0.509567	1.73994	-0.292864	0.769626	NA	0.839097	0.651807
1700060C16Rik	0.0333982	0	5.20139	0	1	NA	0	0
1700060C20Rik	0	NA	NA	NA	NA	NA	0	0
1700061F12Rik	0.0503051	1.05358	5.20139	0.202558	0.839481	NA	0	0.30183
1700061G19Rik	17.0672	0.775769	0.362016	2.14292	0.0321199	0.290208	11.9615	20.7634
1700061I17Rik	0.653767	0	2.12112	0	1	NA	0	0
1700063A18Rik	0.0532845	0	5.20139	0	1	NA	0	0
1700063D05Rik	6.53009	-0.264083	0.52265	-0.505277	0.613364	NA	8.25359	6.8545
1700063O14Rik	4.94905	-0.970955	1.25834	-0.771613	0.440344	NA	1.10392	0.586091
1700064J06Rik	0.142641	0	5.20139	0	1	NA	0	0
1700064M15Rik	0.908807	-0.618071	1.43887	-0.429554	0.66752	NA	0.920168	0.647437
1700065D16Rik	1.5487	0.943647	1.1102	0.849978	0.395337	NA	0.978935	1.93348
1700065I16Rik	0	NA	NA	NA	NA	NA	0	0
1700065J11Rik	0.52576	-1.67685	2.77703	-0.603828	0.545958	NA	0.71783	0
1700065J18Rik	6.22677	0.250279	0.672521	0.372151	0.70978	NA	7.19429	8.21762
1700065L07Rik	0.148583	0	5.20139	0	1	NA	0	0
1700065O20Rik	0.0576011	1.05358	5.20139	0.202558	0.839481	NA	0	0.345606
1700066B17Rik	0.143481	1.05361	5.20139	0.202563	0.839476	NA	0	0.345606
1700066B19Rik	3.27039	1.40911	1.17136	1.20297	0.228989	NA	0.67322	2.04297
1700066M21Rik	703.555	-0.0793386	0.0748104	-1.06053	0.288904	0.746902	959.911	908.874
1700066N21Rik	0.237792	0	5.06549	0	1	NA	0	0
1700066O22Rik	0.97263	1.05366	1.80192	0.58474	0.558722	NA	0	0.240484
1700067G17Rik	0.639962	1.04078	1.83888	0.565983	0.571406	NA	0.469022	1.04556
1700067K01Rik	16.5227	0.0266439	0.34421	0.077406	0.938301	0.99026	16.412	17.0066
1700067P10Rik	0.437615	0	2.75638	0	1	NA	0	0
1700069L16Rik	1.01443	-0.283424	1.62359	-0.174566	0.861421	NA	0.738275	0.586091
1700069P05Rik	0	NA	NA	NA	NA	NA	0	0
1700071K01Rik	1.9785	0.28898	1.15503	0.250192	0.802439	NA	2.53143	3.18012
1700071M16Rik	33.5716	-0.257428	0.372871	-0.690394	0.489947	0.868662	26.6448	22.4701
1700072B07Rik	0	NA	NA	NA	NA	NA	0	0
1700072O05Rik	0	NA	NA	NA	NA	NA	0	0
1700073E17Rik	1.31592	-1.07225	1.4826	-0.723223	0.469543	NA	1.2642	0.480969
1700074H08Rik	0.770813	-1.30196	2.29101	-0.568293	0.569836	NA	1.55064	0.651807
1700074P13Rik	0.104256	1.05359	5.20139	0.20256	0.839479	NA	0	0.349977
1700080E11Rik	0	NA	NA	NA	NA	NA	0	0
1700080N15Rik	0.645646	2.10431	2.83828	0.741403	0.458449	NA	0.264824	1.2773
1700080O16Rik	0.0293292	0	5.20139	0	1	NA	0	0
1700081H04Rik	0	NA	NA	NA	NA	NA	0	0
1700084C01Rik	263.38	-0.240295	0.14417	-1.66674	0.0955653	0.485034	319.561	270.081
1700084E18Rik	8.64509	0.0219079	0.483663	0.0452957	0.963872	NA	7.50489	7.66787
1700084F23Rik	0.102273	0	5.20139	0	1	NA	0	0
1700084J12Rik	0.607372	-1.59333	2.19849	-0.724735	0.468615	NA	0.657203	0
1700085C21Rik	0.0576011	1.05358	5.20139	0.202558	0.839481	NA	0	0.345606
1700086L19Rik	294.485	-0.018285	0.374453	-0.0488314	0.961054	0.993083	480.379	474.455
1700086O06Rik	54.8253	0.0872499	0.210219	0.415042	0.678111	0.931487	49.7135	53.7675
1700088E04Rik	33.0144	-0.0625769	0.252142	-0.248181	0.803994	0.962204	31.6157	30.4003
1700091H14Rik	0.167479	0.918345	5.19794	0.176675	0.859764	NA	0.204198	0.480969
1700092C02Rik	0	NA	NA	NA	NA	NA	0	0
1700092C10Rik	0	NA	NA	NA	NA	NA	0	0
1700092E19Rik	0.0947803	1.05359	5.20139	0.20256	0.839479	NA	0	0.349977
1700092K14Rik	0.641015	-0.0024261	2.16719	-0.00111947	0.999107	NA	1.91698	1.92911
1700092M07Rik	5.06671	0.129519	0.6359	0.203678	0.838605	NA	4.6064	4.85059
1700093K21Rik	2.67406	0.185224	0.847828	0.218468	0.827064	NA	2.02409	2.38387
1700094D03Rik	195.028	0.142025	0.165887	0.856154	0.391913	0.819825	119.803	132.022
1700094J05Rik	0.210717	0.304684	4.17277	0.0730173	0.941792	NA	0.469022	0.590461
1700094M24Rik	0.399083	0.332302	3.75003	0.0886133	0.929389	NA	0.28527	0.345606
1700095A21Rik	0.148211	1.05362	5.20139	0.202564	0.839476	NA	0	0.240484
1700095B10Rik	0.176274	0	5.20139	0	1	NA	0	0
1700096J18Rik	2.4874	-0.677038	1.14571	-0.590932	0.554566	NA	1.44982	0.892292
1700096K18Rik	63.0592	0.0593813	0.198192	0.299615	0.764471	0.9537	54.2246	56.991
1700097N02Rik	15.0511	-2.48729	0.589869	-4.21668	2.47923e-05	NA	15.4053	2.88275
1700100L14Rik	0.34567	1.83746	2.78153	0.660592	0.508874	NA	0	0.647437
1700101E01Rik	15.0417	-0.672714	0.859846	-0.782366	0.434	NA	2.87547	1.78458
1700101I11Rik	25.0782	0.171268	0.297033	0.576596	0.564213	0.895123	40.2792	45.3769
1700101O22Rik	0.0852954	-1.14801	5.19449	-0.221006	0.825088	NA	0.511772	0
1700102H20Rik	6.1167	-0.485955	0.650897	-0.746592	0.45531	NA	5.41505	3.88846
1700102P08Rik	34.3313	-0.00861151	0.300097	-0.0286958	0.977107	0.996678	34.8903	34.6244
1700104L18Rik	0	NA	NA	NA	NA	NA	0	0
1700105P06Rik	4.3353	0.835167	0.77635	1.07576	0.282034	NA	2.84087	5.32393
1700106J16Rik	0.0569768	1.05359	5.20139	0.20256	0.839479	NA	0	0.240484
1700108F19Rik	1.68407	-1.09236	1.01036	-1.08115	0.27963	NA	2.51728	1.2379
1700108J01Rik	0.507994	0.332313	2.45406	0.135413	0.892285	NA	0.226503	0.240484
1700109G14Rik	0.591287	0.437382	2.19225	0.199512	0.841862	NA	0.408396	0.603661
1700109G15Rik	0.120242	2.03292	5.18581	0.392016	0.695047	NA	0	0.721453
1700109H08Rik	33.9432	-0.0504928	0.250119	-0.201875	0.840015	0.9699	35.1628	34.8501
1700109I08Rik	0.208268	0.33229	5.20139	0.0638847	0.949062	NA	0.204198	0.240484
1700109K24Rik	35.5313	-0.185815	0.231853	-0.801436	0.422879	0.838721	50.3527	44.2967
1700110C19Rik	13.0718	-0.16374	0.379059	-0.431965	0.665767	NA	13.6218	12.2428
1700110I01Rik	6.92911	-0.25468	0.955885	-0.266433	0.789905	NA	10.9134	9.03244
1700110K17Rik	1.01293	0.383654	1.67071	0.229636	0.818375	NA	0.430701	0.695584
1700111N16Rik	0.734055	1.13366	2.24434	0.505118	0.613476	NA	0.28527	0.699954
1700112E06Rik	29.387	0.861256	0.402509	2.13972	0.0323777	0.290908	6.35007	11.0396
1700112H15Rik	0.602704	-0.389028	1.8332	-0.212212	0.831942	NA	0.226503	0
1700112J05Rik	0.24254	-0.83792	4.04959	-0.206915	0.836076	NA	0.657203	0.240484
1700113A16Rik	633.053	-0.0163738	0.0664921	-0.246252	0.805487	0.962787	733.42	725.579
1700113H08Rik	2.46809	-0.152996	0.996733	-0.153497	0.878006	NA	1.73695	1.59225
1700119H24Rik	0.833813	0	2.05027	0	1	NA	0	0
1700120C14Rik	9.22033	0.593242	0.445434	1.33183	0.182916	NA	12.0637	18.3065
1700120E14Rik	0	NA	NA	NA	NA	NA	0	0
1700120G07Rik	0.660295	-1.46429	1.77052	-0.827042	0.408213	NA	1.06187	0.345606
1700120K04Rik	12.0502	0.254507	0.476071	0.534598	0.592928	NA	8.53443	9.92905
1700121L16Rik	0.13258	0	5.20139	0	1	NA	0	0
1700121N20Rik	0.733964	0.0734579	1.84808	0.0397482	0.968294	NA	0.942473	1.04993
1700122O11Rik	0.0341367	0	5.20139	0	1	NA	0	0
1700123I01Rik	6.65587	2.31924	1.16382	1.99278	0.0462858	NA	0.430701	2.3663
1700123K08Rik	1.24173	-1.44159	1.37232	-1.05047	0.293501	NA	1.67446	0.647437
1700123L14Rik	3.19194	-0.241129	0.892341	-0.270221	0.78699	NA	3.28642	2.72502
1700123M08Rik	39.1679	-0.147008	0.220887	-0.665537	0.505707	0.873489	54.081	48.6878
1700123O12Rik	0	NA	NA	NA	NA	NA	0	0
1700123O20Rik	550.457	-0.0789973	0.0739855	-1.06774	0.285638	0.743174	496.396	469.106
1700123O21Rik	0.477791	-0.414681	2.41377	-0.171798	0.863596	NA	0.511772	0.30183
1700124L16Rik	15.4127	-0.280805	0.39732	-0.706749	0.479723	NA	20.6655	16.9845
1700125G02Rik	15.0786	0.148951	0.341908	0.435647	0.663093	NA	18.5634	20.7985
1700125G22Rik	0.679721	-0.401689	1.80226	-0.22288	0.823629	NA	0.491327	0.240484
1700125H03Rik	9.93277	-0.261252	0.440755	-0.592737	0.553357	NA	15.8163	13.4113
1700125H20Rik	2.96272	0.72086	0.913751	0.788902	0.43017	NA	1.95973	3.0833
1700126H18Rik	0.169852	0	5.20139	0	1	NA	0	0
1700128A07Rik	0.111614	1.05359	5.20139	0.20256	0.839479	NA	0	0.349977
1700128F08Rik	0	NA	NA	NA	NA	NA	0	0
1700129C05Rik	0	NA	NA	NA	NA	NA	0	0
1810006J02Rik	1.71698	0	1.63009	0	1	NA	0	0
1810007C17Rik	1.96744	-1.1807	1.06404	-1.10964	0.267155	NA	2.63667	1.06706
1810007D17Rik	0.804391	1.05981	1.48265	0.71481	0.474726	NA	0.776597	1.59225
1810008I18Rik	1.46758	0	1.74594	0	1	NA	0	0
1810009A15Rik	7.92757	-0.193406	0.485787	-0.398129	0.690535	NA	8.23547	7.37924
1810009J06Rik	0.127192	0	5.20139	0	1	NA	0	0
1810010D01Rik	7.62635	0.314105	0.57578	0.54553	0.585389	NA	4.81691	5.93503
1810010H24Rik	89.6247	0.260763	0.177374	1.47013	0.141526	0.567904	55.1157	66.7282
1810011H11Rik	34.0738	0.32391	0.340929	0.950079	0.342072	0.786911	13.3708	16.0874
1810011O10Rik	416.281	0.174273	0.213804	0.815104	0.415013	0.834074	43.169	49.0422
1810012K16Rik	6.30001	-0.314924	0.770394	-0.408783	0.682699	NA	5.06099	4.18628
1810013A23Rik	1.07433	-0.303754	1.62924	-0.186439	0.852101	NA	0.71597	0.480969
1810013L24Rik	1523.21	0.0527811	0.0825071	0.639716	0.522357	0.879243	1442.07	1496.06
1810014B01Rik	96.3155	0.0599984	0.171378	0.350094	0.726268	0.94393	82.0129	85.7445
1810018F18Rik	0.0826178	0	5.20139	0	1	NA	0	0
1810019D21Rik	6.65279	0.175121	0.923705	0.189586	0.849634	NA	1.57294	2.0386
1810020O05Rik	14.6763	0.611575	0.424161	1.44185	0.149345	NA	11.7391	17.6134
1810021B22Rik	76.7577	0.384861	0.180163	2.13618	0.0326645	0.292266	64.4281	83.2419
1810022K09Rik	530.306	-0.0377187	0.1086	-0.347318	0.728353	0.944228	528.272	515.539
1810024B03Rik	14.5278	0.448868	0.435697	1.03023	0.302902	NA	8.94656	12.6247
1810026B05Rik	449.07	-0.0912278	0.0928754	-0.982261	0.325971	0.773504	357.472	335.217
1810026J23Rik	2104.26	0.0415008	0.0523455	0.792823	0.427881	0.84033	2054.12	2114.05
1810030O07Rik	833.129	0.125829	0.0755297	1.66596	0.0957221	0.485105	532.252	580.671
1810032O08Rik	141.645	-0.0928376	0.137287	-0.676227	0.498896	0.871456	97.3878	91.1548
1810034E14Rik	16.8523	0.627839	0.577855	1.0865	0.277259	0.736336	3.06551	4.77638
1810037I17Rik	1306.88	-0.107274	0.0800226	-1.34055	0.180066	0.629992	1505.54	1396.35
1810041L15Rik	2002.34	0.157843	0.16483	0.957612	0.338259	0.783383	1565.14	1747.7
1810043G02Rik	813.383	0.0601507	0.0814397	0.738592	0.460155	0.855923	882.544	920.927
1810043H04Rik	364.689	0.0272537	0.119571	0.227928	0.819702	0.966434	365.319	372.926
1810044D09Rik	14.7602	0.312742	0.373385	0.837586	0.402263	NA	11.3552	13.8781
1810046K07Rik	1.12199	1.0969	1.82996	0.599414	0.548897	NA	0.204198	0.691213
1810053B23Rik	1.17972	-0.233026	1.5188	-0.153428	0.878061	NA	0.733847	0.651807
1810055G02Rik	821.619	0.0460499	0.0901354	0.510897	0.609423	0.910336	758.76	781.447
1810058I24Rik	521.204	0.0900312	0.0926996	0.971215	0.331441	0.777579	300.449	320.61
1810062G17Rik	5.87863	-0.887858	0.743987	-1.19338	0.232721	NA	3.98195	2.0339
1810062O18Rik	13.6525	0.0968191	0.359226	0.269521	0.787529	NA	16.4824	17.5877
1810064F22Rik	0.88729	0.332207	1.32159	0.251369	0.801529	NA	1.03956	1.29924
1810065E05Rik	1.03971	1.46753	1.53223	0.957772	0.338178	NA	0.855809	2.21774
2010001E11Rik	3.63325	0.751584	0.739826	1.01589	0.309681	NA	2.75792	4.54027
2010002M12Rik	39.5267	-0.0050441	0.217757	-0.0231639	0.98152	0.997546	41.7167	41.8593
2010003K11Rik	0.102897	0	5.20139	0	1	NA	0	0
2010005H15Rik	2.07441	0.331631	1.62073	0.204618	0.837871	NA	0.570539	0.699954
2010009K17Rik	1.40982	-0.868209	1.65892	-0.523359	0.600724	NA	0.612594	0.345606
2010010A06Rik	2.20714	0.591899	0.953478	0.620779	0.534745	NA	1.91884	2.7903
2010012O05Rik	735.968	0.0323398	0.072006	0.449126	0.653341	0.924075	836.57	855.796
2010015L04Rik	382.763	0.153916	0.0882694	1.7437	0.0812107	0.454344	439.554	489.081
2010016I18Rik	5.65975	0.889098	1.35276	0.657249	0.511021	NA	0.491327	0.830946
2010106C02Rik	0.455365	-1.62997	3.17178	-0.513898	0.607324	NA	0.693666	0
2010106E10Rik	1.22331	0.907122	1.57047	0.577613	0.563525	NA	0.570539	0.953638
2010107E04Rik	1517.23	-0.0627371	0.133049	-0.471535	0.637259	0.918127	1741.38	1667.09
2010107G12Rik	27.6942	0.371599	0.382932	0.970406	0.331844	0.777579	9.98612	12.9916
2010107G23Rik	675.908	0.128686	0.0906289	1.41992	0.155631	0.591918	956.923	1046.71
2010109A12Rik	2.94322	0.924998	0.867412	1.06639	0.286248	NA	1.9207	3.7005
2010109I03Rik	2.08601	1.76299	1.06666	1.65281	0.0983693	NA	1.16898	4.09007
2010111I01Rik	1177.61	0.0621061	0.0832933	0.745632	0.45589	0.853909	1255.03	1307.36
2010204K13Rik	268	0.0375906	0.192668	0.195106	0.84531	0.971345	295.287	303.569
2010300C02Rik	11345.6	0.265874	0.315738	0.842071	0.399748	0.823815	9141.02	10991
2010308F09Rik	3.77785	0.098433	0.692809	0.142078	0.887018	NA	5.08656	5.46367
2010310C07Rik	0.109288	0	5.20139	0	1	NA	0	0
2010315B03Rik	366.428	-0.116395	0.113225	-1.028	0.303948	0.758096	316.987	292.236
2010320M18Rik	170.241	0.0798127	0.149937	0.53231	0.594511	0.906082	148.551	157.745
2200002D01Rik	30.9451	-0.0451193	0.443383	-0.101761	0.918946	0.987488	7.06674	6.13611
2200002J24Rik	0.301994	0	3.24456	0	1	NA	0	0
2210010C04Rik	0.690293	1.31751	1.62753	0.809513	0.41822	NA	1.18499	2.95676
2210011C24Rik	12.3453	-0.145874	0.411273	-0.35469	0.722822	NA	15.9795	14.9077
2210013O21Rik	578.433	0.042629	0.0964836	0.441827	0.658615	0.925992	553.161	570.752
2210015D19Rik	277.616	0.17118	0.085951	1.99159	0.0464156	0.353746	319.323	358.873
2210016F16Rik	555.671	0.0424606	0.0968719	0.438317	0.661156	0.926795	243.962	250.289
2210016L21Rik	2844.59	0.0992164	0.0770487	1.28771	0.197846	0.648594	3707.54	3970.92
2210018M11Rik	1264.29	0.00955887	0.0659525	0.144936	0.884762	0.97925	1398.48	1405.51
2210019I11Rik	0.337929	-0.388983	4.76489	-0.0816352	0.934937	NA	0.226503	0
2210039B01Rik	12.1662	1.27526	1.11397	1.14478	0.2523	NA	0.733847	1.54803
2210404O09Rik	164.864	0.0275296	0.134647	0.204457	0.837997	0.969661	177.478	181.095
2210407C18Rik	0.691533	0	2.38079	0	1	NA	0	0
2210408F21Rik	228.896	-0.19585	0.115115	-1.70135	0.0888778	0.472286	366.516	319.703
2210408I21Rik	248.933	0.161486	0.129163	1.25026	0.211206	0.669247	281.082	315.185
2210409D07Rik	0.520453	1.11618	2.0271	0.550631	0.581887	NA	0.264824	0.691213
2210409E12Rik	0.0938874	0	5.20139	0	1	NA	0	0
2210414B05Rik	4.20035	1.75317	1.57599	1.11242	0.265957	NA	0	0.586091
2210416O15Rik	35.4569	-0.275035	0.256785	-1.07107	0.284137	0.743174	33.3754	27.3548
2210417A02Rik	0.312899	0	3.79855	0	1	NA	0	0
2210420H20Rik	0.433527	-0.29535	3.72617	-0.0792637	0.936823	NA	0.408396	0.240484
2300002M23Rik	0	NA	NA	NA	NA	NA	0	0
2300003K06Rik	0	NA	NA	NA	NA	NA	0	0
2300005B03Rik	0.500562	-0.43289	2.42153	-0.178767	0.858121	NA	0.776597	0.480969
2300009A05Rik	275.634	-0.146378	0.109112	-1.34154	0.179745	0.62945	305.274	274.456
2310001H17Rik	35.8552	-0.502715	0.494068	-1.0175	0.308915	0.763014	6.96894	4.51799
2310001K24Rik	0.422902	1.72609	2.83599	0.608639	0.542764	NA	0	0.586091
2310002D06Rik	25.9455	-0.468583	0.28933	-1.61955	0.10533	0.504189	29.6043	21.3058
2310002F09Rik	49.3871	0.319484	0.48877	0.653649	0.513338	0.876163	4.81691	5.8301
2310002J15Rik	2.02068	-0.757399	1.21433	-0.623719	0.532812	NA	2.04453	1.2773
2310002L09Rik	0.314163	0	4.02728	0	1	NA	0	0
2310003H01Rik	525.27	-0.0246242	0.103604	-0.237676	0.812133	0.965625	439.421	430.443
2310005A03Rik	0.0895039	0	5.20139	0	1	NA	0	0
2310005E17Rik	12.4456	1.32535	1.24571	1.06393	0.287359	NA	0.453005	1.2773
2310005G13Rik	2.21868	2.13719	1.33658	1.599	0.10982	NA	0.469022	2.12582
2310007B03Rik	1.64965	1.69077	1.7239	0.980781	0.326701	NA	0.226503	0.993043
2310007L24Rik	7.28264	-1.09705	1.50181	-0.730481	0.465096	NA	0.430701	0
2310008N11Rik	1.32267	0.332185	1.66643	0.199339	0.841998	NA	0.570539	0.691213
2310009A05Rik	158.991	-0.0700841	0.130706	-0.536197	0.591822	0.905049	148.829	142.487
2310009B15Rik	189.8	-0.0929414	0.122642	-0.757826	0.448555	0.850572	146.037	135.795
2310010J17Rik	67.7347	0.466876	0.180227	2.59049	0.00958402	0.146516	47.5226	65.873
2310011J03Rik	1046.75	-0.060966	0.0751669	-0.811075	0.417322	0.835126	997.317	955.056
2310014L17Rik	30.9081	-0.0145958	0.247148	-0.0590568	0.952907	0.991983	34.7307	34.2269
2310015A10Rik	306.99	0.163383	0.105732	1.54526	0.122284	0.534496	212.587	239.147
2310015B20Rik	17.2134	1.7384	0.994445	1.74811	0.0804455	0.453087	0.774737	2.3663
2310015D24Rik	5.73226	0.157173	0.602944	0.260677	0.794342	NA	12.3066	13.5863
2310016D03Rik	0.239664	-0.389001	4.12997	-0.0941898	0.924958	NA	0.204198	0
2310020H05Rik	1.36206	-0.0281576	1.13022	-0.0249134	0.980124	NA	3.02347	2.96996
2310022A10Rik	721.374	-0.0271666	0.0640282	-0.424291	0.671354	0.930303	815.58	800.035
2310022B05Rik	2218.57	0.0899461	0.0846748	1.06225	0.288121	0.746543	1738.97	1852.25
2310030A07Rik	0.116174	-0.389004	5.20139	-0.0747884	0.940383	NA	0.28527	0
2310030G06Rik	92.7761	-0.231998	0.181154	-1.28067	0.20031	0.653233	54.6203	47.3766
2310033P09Rik	551.641	-0.0980272	0.0817515	-1.19909	0.230494	0.693587	522.505	488.203
2310034C09Rik	0.0377504	-0.389024	5.20139	-0.0747923	0.94038	NA	0.226503	0
2310034G01Rik	20.6844	-0.602517	0.350637	-1.71835	0.0857325	0.462809	20.051	13.1658
2310034O05Rik	1.68884	-1.12678	0.981164	-1.14841	0.2508	NA	3.33662	1.5835
2310035C23Rik	1863.56	-0.0507172	0.0584856	-0.867175	0.385846	0.816623	2221.07	2144.38
2310036O22Rik	2485.31	-0.0263004	0.0794025	-0.331229	0.740471	0.948202	2357.52	2313.88
2310039H08Rik	143.139	0.276471	0.187278	1.47626	0.139875	0.566152	59.905	72.8742
2310039L15Rik	0.266469	0	4.98125	0	1	NA	0	0
2310040G24Rik	31.3716	0.139192	0.220661	0.630798	0.528173	0.881869	42.8356	46.9554
2310042E22Rik	18.1584	-0.555639	0.338642	-1.64079	0.100841	0.494079	50.2978	33.8229
2310043L19Rik	0.94498	0.509668	1.16534	0.437355	0.661854	NA	1.53089	2.12145
2310043O21Rik	0.121491	0	5.20139	0	1	NA	0	0
2310045N01Rik	502.465	0.0249789	0.0787862	0.317047	0.751208	0.951677	442.884	450.031
2310047M10Rik	906.948	0.0129137	0.0754748	0.171099	0.864146	0.974813	998.921	1007.57
2310050C09Rik	0	NA	NA	NA	NA	NA	0	0
2310057J18Rik	0.166173	-0.388996	5.20139	-0.0747868	0.940384	NA	0.264824	0
2310057M21Rik	523.672	-0.087962	0.0758513	-1.15966	0.246186	0.710217	632.665	593.95
2310057N15Rik	0	NA	NA	NA	NA	NA	0	0
2310061I04Rik	1055.27	-0.0447548	0.0742257	-0.602955	0.546538	0.888825	1311.14	1271.11
2310061J03Rik	91.5932	0.60983	0.198214	3.07662	0.00209361	0.0572096	38.9626	60.1365
2310061N02Rik	0	NA	NA	NA	NA	NA	0	0
2310065F04Rik	7.94756	-0.0727613	0.564037	-0.129001	0.897357	NA	4.63659	4.51406
2310067B10Rik	2687.95	0.0935372	0.055072	1.69845	0.0894225	0.473727	3094.52	3302.45
2310068J16Rik	11.7914	0.560332	0.484866	1.15564	0.247828	NA	7.36545	10.4801
2310069B03Rik	0.922217	1.05366	1.97627	0.533156	0.593926	NA	0	0.240484
2310069G16Rik	48.3549	-0.243241	0.241427	-1.00751	0.313688	0.766519	70.676	59.3633
2310079G19Rik	0	NA	NA	NA	NA	NA	0	0
2310081J21Rik	0.155283	2.37846	5.16775	0.46025	0.645337	NA	0	0.931697
2410002F23Rik	1613.98	0.117222	0.0626379	1.87142	0.0612863	0.402544	1662.02	1804.58
2410003L11Rik	0.979359	-0.00564942	1.38188	-0.00408823	0.996738	NA	2.091	2.10388
2410004B18Rik	745.586	-0.101448	0.0684683	-1.48168	0.138425	0.563032	846.518	790.61
2410004I01Rik	96.0952	-0.394269	0.281902	-1.3986	0.161932	0.602444	80.2559	61.3462
2410004N09Rik	120.58	0.0572694	0.147895	0.387231	0.698585	0.936784	116.82	121.288
2410004P03Rik	109.288	-0.180492	0.415418	-0.434484	0.663937	0.928127	22.4363	19.7362
2410006H16Rik	443.819	0.204369	0.1221	1.67378	0.094173	0.481773	350.892	404.624
2410007B07Rik	0.838607	1.79763	1.73622	1.03537	0.300495	NA	0.733847	2.56772
2410012E07Rik	0.331278	1.05365	2.47084	0.426433	0.669792	NA	0	0.345606
2410012M07Rik	0.13756	0	5.20139	0	1	NA	0	0
2410015M20Rik	1298.38	0.0688612	0.116998	0.588566	0.556153	0.891958	1344.52	1410.5
2410016O06Rik	533.748	-0.123132	0.0741892	-1.6597	0.0969747	0.487535	705.335	646.816
2410017I17Rik	1.18312	1.07065	1.65238	0.647942	0.517022	NA	0.28527	0.647437
2410018L13Rik	47.982	-0.0312186	0.309758	-0.100784	0.919722	0.987541	41.7342	40.7089
2410021H03Rik	15.3348	-0.217946	0.528345	-0.412507	0.679968	NA	28.5951	24.5997
2410076I21Rik	16.9975	0.520579	0.406654	1.28015	0.200491	0.653233	11.0213	15.5673
2410088K16Rik	0.120371	0	5.20139	0	1	NA	0	0
2410089E03Rik	1655.82	0.00226803	0.063506	0.0357136	0.971511	0.99536	1931.84	1934.56
2410114N07Rik	0	NA	NA	NA	NA	NA	0	0
2410124H12Rik	1.85292	-0.37702	1.61911	-0.232856	0.815873	NA	0.489468	0.349977
2410127L17Rik	461.697	-0.25993	0.0881431	-2.94895	0.00318855	0.0758913	367.681	305.261
2410131K14Rik	662.074	-0.0946028	0.0769785	-1.22895	0.21909	0.679234	775.773	725.039
2410137M14Rik	6.13372	0.351374	0.56105	0.62628	0.531131	NA	11.3087	14.4083
2410141K09Rik	0.150489	0	5.20139	0	1	NA	0	0
2500004C02Rik	149.26	0.126464	0.114905	1.10059	0.271075	0.730395	142.735	156.37
2510002D24Rik	403.106	0.0139168	0.0845449	0.164608	0.869252	0.975755	416.822	420.626
2510003E04Rik	4953.65	0.020964	0.0446163	0.469872	0.638447	0.918526	5820.05	5904.87
2510009E07Rik	1903.17	-0.197667	0.0690727	-2.86173	0.00421339	0.0894276	2143.71	1867
2510039O18Rik	1734.88	0.0673242	0.0644974	1.04383	0.296565	0.75274	1195.92	1252.23
2510049J12Rik	64.2063	0.114897	0.196635	0.584317	0.559007	0.892864	60.2405	64.542
2610001J05Rik	678.17	-0.101849	0.0909228	-1.12018	0.262639	0.722835	550.984	513.823
2610002J02Rik	437.431	0.0459076	0.0951337	0.482559	0.629409	0.916557	313.173	325.131
2610002M06Rik	1478.23	0.0176146	0.0540406	0.325952	0.744461	0.949416	1864.59	1891.11
2610005L07Rik	2785.44	-0.1861	0.0831576	-2.23793	0.0252259	0.254777	3023.2	2656.48
2610008E11Rik	878.258	-0.0454121	0.0640678	-0.708813	0.478441	0.863859	813.507	789.234
2610015P09Rik	253.164	-0.0342209	0.105313	-0.324943	0.745224	0.949542	222.723	217.861
2610016A17Rik	0.615568	1.00591	1.90822	0.527148	0.598091	NA	0.489468	0.997414
2610018G03Rik	144.678	-0.0554329	0.15369	-0.360681	0.718338	0.942321	85.1076	82.2157
2610020C07Rik	25.1029	0.131927	0.332068	0.397289	0.691154	0.935306	19.3571	21.2795
2610020H08Rik	59.8855	-0.0810242	0.291495	-0.277961	0.781042	0.958939	20.6569	19.4074
2610027K06Rik	17.3368	0.0462401	0.569577	0.0811832	0.935296	0.989557	4.16756	4.29979
2610028E06Rik	3.44233	0.684541	0.604027	1.1333	0.25709	NA	5.0896	8.25363
2610028H24Rik	1.62122	0.0348232	1.09922	0.0316799	0.974727	NA	1.73252	1.67509
2610034B18Rik	596.126	0.00647108	0.0638359	0.101371	0.919256	0.987488	469.588	471.225
2610034M16Rik	37.8658	-0.0312532	0.282239	-0.110733	0.911828	0.985692	92.0013	89.9786
2610035D17Rik	221.146	0.0352462	0.137097	0.25709	0.797109	0.960645	229.61	235.643
2610035F20Rik	141.051	0.184736	0.205653	0.898292	0.36903	0.80459	33.4175	38.364
2610037D02Rik	4.13256	-1.49609	1.17097	-1.27766	0.20137	NA	2.31309	0.782799
2610044O15Rik8	244.057	-0.133535	0.126789	-1.0532	0.292249	0.749434	289.399	263.92
2610100L16Rik	101.38	-0.108683	0.302793	-0.358936	0.719643	0.942498	211.142	195.88
2610203C20Rik	1108.72	-0.120496	0.119537	-1.00802	0.313443	0.766504	537.537	495.441
2610203C22Rik	29.1625	-0.198503	0.312226	-0.635766	0.524929	0.8803	35.2473	30.5437
2610206C17Rik	21.0837	0.0421474	0.385255	0.109401	0.912884	0.986003	12.2386	12.97
2610207O16Rik	29.9877	-0.380272	0.257453	-1.47706	0.139661	0.566041	40.1657	30.3862
2610301B20Rik	991.984	-0.0354743	0.0785414	-0.451663	0.651512	0.922986	1020.02	997.804
2610305D13Rik	171.068	-0.126044	0.243838	-0.516916	0.605215	0.9101	27.4839	24.5329
2610306M01Rik	167.295	-0.0063437	0.150572	-0.0421306	0.966395	0.994481	177.275	175.959
2610307P16Rik	11.4918	-0.576044	0.674032	-0.854625	0.392759	NA	4.14339	2.89149
2610316D01Rik	71.7809	0.0395605	0.47475	0.0833291	NA	NA	138.233	142.12
2610318N02Rik	21.6676	-0.137153	0.306452	-0.44755	0.654478	0.924568	23.956	21.4542
2610507B11Rik	9355.84	0.0347226	0.0373147	0.930534	0.352095	0.791556	9189.99	9412.61
2610507I01Rik	56.9677	-0.132242	0.214415	-0.616756	0.537396	0.886242	46.7031	43.4615
2610524H06Rik	369.799	-0.0311218	0.0896294	-0.347228	0.72842	0.944237	442.97	433.56
2610528A11Rik	4.93559	0.30575	0.624623	0.489496	0.624491	NA	4.48143	5.80927
2610528J11Rik	1.50096	-2.88356	1.45409	-1.98306	0.0473603	NA	2.77651	0.345606
2700029M09Rik	1086.9	-0.155437	0.0649988	-2.39138	0.0167852	0.204248	1227.96	1102.78
2700038G22Rik	33.0009	0.207008	0.303882	0.681211	0.495738	0.870734	15.9055	18.1521
2700046A07Rik	13.3219	-0.356841	0.384833	-0.927262	0.353791	NA	15.0973	11.6304
2700046G09Rik	77.0602	0.0350414	0.17144	0.204395	0.838045	0.969661	64.2096	65.8432
2700049A03Rik	308.406	0.115626	0.0973022	1.18832	0.234707	0.697506	232.37	252.667
2700054A10Rik	115.495	0.256081	0.164752	1.55434	0.120102	0.531342	127.793	152.69
2700060E02Rik	1610.87	-0.012736	0.0656578	-0.193975	0.846195	0.971709	1375.38	1363.79
2700062C07Rik	333.684	0.0110653	0.106941	0.103471	0.917589	0.987336	329.805	331.88
2700069I18Rik	20.0657	0.140293	0.401015	0.349845	0.726455	0.94393	9.23998	10.4635
2700070H01Rik	2.45889	-0.273664	0.87452	-0.312931	0.754333	NA	2.96213	2.64226
2700081O15Rik	2385.75	0.0377184	0.0755165	0.499473	0.617446	0.912527	1621.04	1663.23
2700086A05Rik	1.6276	1.95222	1.57459	1.23983	0.215039	NA	0.204198	1.06706
2700089E24Rik	4107	-0.0179032	0.0435754	-0.410856	0.681178	0.932598	5056.42	4995.95
2700089I24Rik	0.165496	0	5.20139	0	1	NA	0	0
2700094K13Rik	382.133	-0.0395511	0.111857	-0.353586	0.723649	0.94335	415.38	405.437
2700097O09Rik	143.061	-0.0900863	0.139242	-0.646974	0.517648	0.878004	160.718	151.006
2700099C18Rik	52.6542	-0.0623012	0.231821	-0.268747	0.788124	0.959361	67.056	64.3521
2810001G20Rik	200.356	-0.0338061	0.110157	-0.306892	0.758926	0.953273	225.744	220.4
2810002D19Rik	59.3696	-0.279257	0.20137	-1.38679	0.165506	0.606393	45.0888	37.4598
2810004N23Rik	520.703	-0.0439802	0.0797862	-0.551226	0.581479	0.902344	458.014	444.337
2810006K23Rik	342.18	-0.142641	0.098057	-1.45467	0.14576	0.576751	356.273	322.739
2810007J24Rik	0.156787	0	5.20139	0	1	NA	0	0
2810008D09Rik	568.893	-0.108003	0.124338	-0.868624	0.385053	0.815677	552.028	512.162
2810013P06Rik	496.116	-0.0866814	0.0849031	-1.02095	0.30728	0.761044	463.765	438.502
2810021J22Rik	315.136	-0.00535754	0.0933114	-0.0574158	0.954214	0.992168	346.229	347.603
2810025M15Rik	536.903	0.0820954	0.0889774	0.922654	0.356187	0.794369	353.303	372.679
2810029C07Rik	154.247	-0.0491221	0.126299	-0.388936	0.697324	0.936352	199.434	192.161
2810032G03Rik	178.392	-0.00136413	0.0997669	-0.0136732	0.989091	0.998855	226.953	227.207
2810047C21Rik1	9.07945	0.355004	0.582767	0.60917	0.542412	NA	5.39531	7.04673
2810049E08Rik	38.8933	-0.0482596	0.23173	-0.208257	0.835028	0.968815	62.1505	60.2924
2810055G20Rik	108.059	-0.20439	0.226118	-0.903905	0.366046	0.802548	38.7612	33.636
2810403A07Rik	1892.88	-0.0454665	0.0759141	-0.59892	0.549226	0.890307	1927.85	1865.97
2810403D21Rik	15.949	0.287803	0.416992	0.690188	0.490076	0.868667	10.8647	13.5078
2810404M03Rik	3.79829	0.523381	0.627054	0.834666	0.403906	NA	5.49612	7.99145
2810405F15Rik	7.32008	-0.0999489	0.671368	-0.148874	0.881653	NA	12.6909	11.8273
2810408A11Rik	13.9929	0.933508	0.458248	2.03712	0.0416376	NA	6.50551	12.4401
2810408I11Rik	15.6168	-0.269081	0.375862	-0.715903	0.474052	NA	13.3388	11.3381
2810408M09Rik	669.844	0.087008	0.0714617	1.21755	0.223396	0.684103	651.327	689.796
2810410L24Rik	167.965	-0.263014	0.15346	-1.71389	0.0865492	0.464747	132.117	109.952
2810417H13Rik	129.986	-0.629602	0.361305	-1.74258	0.0814073	0.454344	14.0235	9.41295
2810428I15Rik	1280.84	-0.0133037	0.0793702	-0.167616	0.866886	0.974912	1412.57	1399.43
2810429I04Rik	16.7196	-0.176976	0.45611	-0.388012	0.698007	0.93658	27.8237	24.4063
2810433D01Rik	59.0371	0.327131	0.558912	0.5853	0.558346	0.892522	3.75544	4.68917
2810442I21Rik	14.8471	-0.0487559	0.585425	-0.0832828	0.933627	NA	4.01427	4.01552
2810442N19Rik	5.50017	-0.813699	0.71519	-1.13774	0.25523	NA	6.40097	3.60411
2810454H06Rik	25.4293	0.254712	0.363066	0.701558	0.482955	0.865929	18.6586	22.6674
2810459M11Rik	232.324	-0.128368	0.234087	-0.548376	0.583434	0.902861	292.137	267.286
2810468N07Rik	407.144	-0.268431	0.0924606	-2.90319	0.00369381	0.0826496	660.565	548.464
2810471M01Rik	0.749371	1.05366	3.0788	0.342231	0.732177	NA	0	0.240484
2810474O19Rik	897.158	-0.00632113	0.108583	-0.0582147	0.953578	0.992077	345.21	343.152
2900005J15Rik	138.761	0.10375	0.166934	0.621502	0.534269	0.884664	101.14	108.35
2900008C10Rik	135.756	-0.0533756	0.109928	-0.48555	0.627286	0.916107	200.475	192.27
2900009J06Rik	8.7369	0.708491	0.437135	1.62076	0.10507	NA	8.86618	14.3474
2900011O08Rik	5086.74	-0.00574737	0.307975	-0.0186618	0.985111	0.997808	8339.7	8306.57
2900026A02Rik	2641.68	0.0434484	0.0713544	0.60891	0.542584	0.887885	2099.77	2162.56
2900041M22Rik	20.3174	-0.245537	0.426808	-0.575287	0.565097	0.89573	11.5024	9.84621
2900052N01Rik	804.486	0.164138	0.461585	0.355595	NA	NA	1205.22	1350.66
2900055J20Rik	99.0169	-0.225531	0.151004	-1.49355	0.135294	0.557272	168.992	144.224
2900056M20Rik	880.871	-0.0591911	0.0900045	-0.657646	0.510766	0.875387	1158.26	1113.18
2900057B20Rik	1.5411	0	1.66268	0	1	NA	0	0
2900060B14Rik	0.976845	0.245519	1.7566	0.139769	0.888843	NA	0.511772	0.480969
2900076A07Rik	209.208	0.0809523	0.129586	0.624698	0.532169	0.883382	186.125	197.545
2900079G21Rik	185.195	0.00265168	0.665667	0.0039835	NA	NA	288.453	289.003
2900092C05Rik	0.155143	-1.01154	5.19881	-0.194571	0.845729	NA	0.408396	0
2900092D14Rik	306.936	-0.0299593	0.162134	-0.184781	0.853401	0.972937	418.277	409.018
2900097C17Rik	37219	0.0910731	0.0392537	2.32012	0.0203345	0.225883	44587.6	47497.4
3000002C10Rik	89.4123	0.152894	0.181037	0.844547	0.398364	0.823277	73.6693	83.1667
3010001F23Rik	58.7947	-0.0925145	0.211177	-0.43809	0.661321	0.926795	64.1753	59.7963
3010026O09Rik	201.479	0.297107	0.132666	2.23951	0.0251229	0.2539	230.247	283.933
3010033K07Rik	1.23569	1.74756	1.6867	1.03609	0.300162	NA	0	0.590461
3100003L05Rik	1.71644	1.16184	1.21779	0.954055	0.340056	NA	0.980795	2.20036
3110001I22Rik	66.9736	0.155796	0.229955	0.677506	0.498085	0.871456	42.8604	47.1564
3110002H16Rik	767.268	-0.0268969	0.0633213	-0.424769	0.671005	0.930215	682.247	672.716
3110007F17Rik	0.0503051	1.05358	5.20139	0.202558	0.839481	NA	0	0.30183
3110009E18Rik	46.8425	-0.0689532	0.22432	-0.307388	0.758548	0.953273	35.1625	33.8257
3110009F21Rik	2.07244	0.796556	1.38501	0.575128	0.565205	NA	0.816792	1.58788
3110015C05Rik	0.595625	-0.302701	1.82595	-0.165777	0.868332	NA	1.36875	1.08463
3110021A11Rik	11.5305	-0.409838	0.427836	-0.957932	0.338097	NA	11.7416	8.40219
3110021N24Rik	224.774	-0.149051	0.120193	-1.2401	0.214939	0.67521	334.604	301.325
3110035E14Rik	8930.8	-0.256198	0.0835543	-3.06625	0.00216763	0.0586196	18958.1	15871.8
3110039I08Rik	9.21569	0.0893354	0.398243	0.224324	0.822505	NA	12.581	13.4111
3110039M20Rik	74.6556	-0.2197	0.179935	-1.221	0.222087	0.683258	108.71	92.3915
3110040N11Rik	252.286	0.0883961	0.126772	0.697283	0.485625	0.867093	194.051	208.001
3110043O21Rik	883.655	-0.0354664	0.0849551	-0.417472	0.676333	0.931097	949.562	927.836
3110045C21Rik	3.85457	0.179062	0.717577	0.249538	0.802945	NA	4.00984	4.64976
3110052M02Rik	431.785	-0.0798778	0.068326	-1.16907	0.242376	0.706844	548.78	519.135
3110056K07Rik	167.726	-0.0421402	0.127521	-0.330457	0.741055	0.948457	130.889	127.794
3110057O12Rik	289.107	-0.134729	0.108782	-1.23852	0.215521	0.675685	368.664	335.822
3110062M04Rik	122.49	0.0993521	0.135989	0.730592	0.465029	0.858789	95.7755	102.266
3110070M22Rik	5.37443	1.55987	0.791035	1.97194	0.0486167	NA	2.63482	8.10952
3110079O15Rik	7.12725	0.145532	0.382636	0.380341	0.703693	NA	16.4693	18.2491
3110082I17Rik	340.181	-0.0274513	0.111973	-0.24516	0.806332	0.963058	342.383	335.007
3110082J24Rik	23.4401	-0.35284	0.285488	-1.23592	0.216489	0.677185	38.5356	30.3566
3110099E03Rik	2.76176	-0.00716532	0.79882	-0.00896988	0.992843	NA	6.59288	6.58717
3200001D21Rik	19.8462	0.0418583	0.282007	0.14843	0.882003	0.978249	29.0597	30.2912
3300002I08Rik	28.6195	0.209605	0.266426	0.786726	0.431442	0.840923	32.1223	36.5349
3300005D01Rik	1.64922	0	1.60734	0	1	NA	0	0
3425401B19Rik	48.4367	0.113214	0.479471	0.236122	0.813338	0.965756	5.49868	5.86145
3632451O06Rik	1043.2	0.125246	0.0949737	1.31875	0.187254	0.636355	751.946	820.814
3632454L22Rik	24.627	-0.378464	0.246993	-1.53229	0.125452	0.53969	46.1688	36.0212
3830403N18Rik	6.94773	-0.957483	1.35131	-0.70856	0.478597	NA	0.679508	0.240484
3830406C13Rik	826.794	-0.0439182	0.0913485	-0.480776	0.630676	0.916742	820.812	797.116
3830408C21Rik	77.3447	0.197856	0.172381	1.14779	0.251056	0.71367	77.5142	88.9461
3830417A13Rik	0.0885135	0	5.20139	0	1	NA	0	0
3930402G23Rik	11.3848	-0.50853	0.507589	-1.00185	0.316414	NA	12.9959	9.18577
4430402I18Rik	95.1665	0.273669	0.172809	1.58365	0.113274	0.519501	91.5772	110.881
4631405J19Rik	22.0559	0.746154	1.12007	0.666169	0.505303	0.87345	0.776597	1.33865
4632415L05Rik	1108.48	0.0592542	0.0516705	1.14677	0.251476	0.71367	1161.16	1209.92
4632427E13Rik	23.2538	-0.861008	0.348144	-2.47314	0.0133933	0.177427	26.2687	14.6052
4632428C04Rik	26.0488	-0.43498	0.288312	-1.50872	0.131371	0.551587	23.8244	17.4569
4632428N05Rik	1652.41	0.150677	0.120834	1.24697	0.212407	0.671487	644.866	715.077
4632434I11Rik	29.6861	0.148249	0.391278	0.378883	0.704775	0.938416	11.3749	13.1927
4732416N19Rik	3.52898	1.60936	1.15722	1.39071	0.164313	NA	0.634899	2.22648
4732456N10Rik	0.537778	-0.389026	2.01647	-0.192924	0.847018	NA	0.28527	0
4732471J01Rik	146.201	-0.0634329	0.106714	-0.594422	0.55223	0.891382	198.962	189.304
4732490B19Rik	0.659338	1.05366	2.21503	0.475686	0.634298	NA	0	0.30183
4732491K20Rik	102.348	0.0293362	0.158935	0.18458	0.853558	0.972937	140.526	143.453
4831440E17Rik	149.585	-0.104267	0.15232	-0.684525	0.493644	0.870095	132.811	122.668
4833403I15Rik	48.1721	-0.0358704	0.253672	-0.141405	0.88755	0.979324	37.3774	36.6673
4833411C07Rik	11.0229	0.409698	0.505244	0.810892	0.417428	NA	5.71891	7.8124
4833412C05Rik	5.74755	0.525558	0.632386	0.831073	0.405933	NA	9.6904	14.0109
4833417C18Rik	11.3346	0.318504	0.450487	0.707021	0.479553	NA	8.69704	10.7556
4833418N02Rik	29.9734	0.398987	0.285463	1.39768	0.162208	0.602932	24.3972	32.5125
4833419F23Rik	13.867	0.92291	0.598166	1.5429	0.122855	NA	3.20978	5.81278
4833420G17Rik	340.656	0.216629	0.136461	1.58747	0.112406	0.51764	268.902	311.743
4833422C13Rik	59.1756	-0.300718	0.200336	-1.50107	0.133338	0.554567	68.4259	54.858
4833423E24Rik	7.89152	-0.148604	0.957613	-0.155181	0.876678	NA	1.67632	1.5441
4833424O15Rik	1241.28	-0.162756	0.544405	-0.298961	NA	NA	1631.98	1457.85
4833427F10Rik	0.714249	0	2.30006	0	1	NA	0	0
4833427G06Rik	38.1712	-0.986651	1.20556	-0.818414	0.413121	0.832588	1.22774	0.603661
4833428L15Rik	1.04187	-1.89847	1.49984	-1.26578	0.205591	NA	1.33042	0.30183
4833439L19Rik	3939.99	-0.00368733	0.0413489	-0.0891759	0.928942	0.989116	4038.92	4027.39
4921501E09Rik	0.166746	0	5.20139	0	1	NA	0	0
4921504A21Rik	61.6706	-0.249955	0.200661	-1.24566	0.21289	0.672137	59.9294	49.9683
4921504E06Rik	0.446035	-0.386275	4.45714	-0.0866643	0.930938	NA	1.36758	1.04993
4921506M07Rik	0.906833	-0.22471	1.23195	-0.182402	0.855267	NA	1.47212	1.29924
4921507L20Rik	25.5675	-0.184296	0.315261	-0.584581	0.55883	0.892864	29.7073	26.0728
4921507P07Rik	24.2397	0.314664	0.26984	1.16612	0.243568	0.707998	23.862	29.7262
4921508D12Rik	0.129983	0	5.20139	0	1	NA	0	0
4921509C19Rik	0.997229	-0.3733	1.81617	-0.205542	0.837149	NA	0.489468	0.30183
4921509O07Rik	1.07373	0.968539	1.74015	0.556584	0.577812	NA	0.550094	1.04556
4921511C10Rik	4.49868	0.611156	0.570134	1.07195	0.283742	NA	4.78458	7.41438
4921511C20Rik	0	NA	NA	NA	NA	NA	0	0
4921511H03Rik	0.173237	-2.05992	5.15334	-0.399725	0.689359	NA	0.938045	0
4921511I17Rik	0.816907	0.312055	1.28495	0.242854	0.808119	NA	1.28837	1.5835
4921511M17Rik	0	NA	NA	NA	NA	NA	0	0
4921513I03Rik	1.80801	1.33028	1.41228	0.941937	0.346225	NA	0.570539	1.29042
4921515E04Rik	0.145227	0.997624	5.19676	0.19197	0.847766	NA	0.28527	0.586091
4921517D22Rik	0.0293292	0	5.20139	0	1	NA	0	0
4921524J17Rik	385.301	0.09164	0.0896854	1.02179	0.306878	0.760798	352.791	374.363
4921524L21Rik	0.276449	1.05363	4.94413	0.213108	0.831243	NA	0	0.240484
4921525O09Rik	0.866367	2.01321	1.58042	1.27384	0.202719	NA	0.634899	2.73822
4921529L05Rik	0.151422	0	5.20139	0	1	NA	0	0
4921530L21Rik	1.88619	-0.835587	1.28075	-0.65242	0.51413	NA	3.51478	1.86743
4921531C22Rik	86.557	-0.14437	0.190408	-0.758214	0.448323	0.850551	69.3561	61.5201
4921531P14Rik	0.16564	-1.55369	5.17542	-0.300205	0.764021	NA	0.657203	0
4921533I20Rik	0.0908669	0	5.20139	0	1	NA	0	0
4921534H16Rik	0.328679	2.52515	4.7015	0.537094	0.591203	NA	0	1.03682
4921536K21Rik	20.9154	0.20827	0.389734	0.53439	0.593072	0.905777	11.7008	13.5426
4921539E11Rik	0.337813	0.383746	3.93671	0.0974789	0.922346	NA	0.453005	0.603661
4922502D21Rik	0.0795672	0	5.20139	0	1	NA	0	0
4922502H24Rik	0	NA	NA	NA	NA	NA	0	0
4922502N22Rik	0.596208	-1.5694	2.22333	-0.705879	0.480263	NA	1.14108	0.30183
4930401C15Rik	0.58905	0.197214	2.20244	0.0895434	0.92865	NA	0.657203	0.721453
4930401O10Rik	0	NA	NA	NA	NA	NA	0	0
4930401O12Rik	0.0377504	-0.389024	5.20139	-0.0747923	0.94038	NA	0.226503	0
4930402F06Rik	0.349184	1.05365	2.44325	0.431249	0.666287	NA	0	0.240484
4930402F11Rik	0.178492	-0.388985	5.20139	-0.0747847	0.940386	NA	0.204198	0
4930402H24Rik	2129.55	-0.00231839	0.0717662	-0.0323048	0.974229	0.995813	2340.17	2336.54
4930402K13Rik	0	NA	NA	NA	NA	NA	0	0
4930404A05Rik	0.17536	0	5.20139	0	1	NA	0	0
4930404A10Rik	0.185764	0	5.20139	0	1	NA	0	0
4930404H11Rik	1.1064	0.912356	1.81916	0.501527	0.616	NA	0.453005	0.905491
4930404I05Rik	27.0473	-0.383986	0.279752	-1.3726	0.169878	0.614232	32.5068	24.4985
4930404N11Rik	676.441	0.0629381	0.0751687	0.837291	0.402429	0.825635	599.556	623.736
4930405A10Rik	0	NA	NA	NA	NA	NA	0	0
4930405A21Rik	19.5131	-0.217846	0.431465	-0.504899	0.61363	0.910921	8.00553	7.2964
4930405D11Rik	1.07883	-1.04606	2.0115	-0.520038	0.603037	NA	0.408396	0
4930405J17Rik	1.41863	1.61064	1.51501	1.06312	0.287728	NA	0.430701	1.41704
4930405L22Rik	0.0703448	-0.389014	5.20139	-0.0747903	0.940382	NA	0.226503	0
4930406D18Rik	0.109638	-1.10361	5.19585	-0.212402	0.831793	NA	0.453005	0
4930407I10Rik	0.046167	0	5.20139	0	1	NA	0	0
4930412B13Rik	0.188786	0	4.30168	0	1	NA	0	0
4930412C18Rik	21.4988	0.400003	0.304854	1.31211	0.189482	0.638149	27.5608	36.5371
4930412D23Rik	0	NA	NA	NA	NA	NA	0	0
4930412O13Rik	2.84212	-1.02257	1.28073	-0.798422	0.424626	NA	1.24562	0.480969
4930413E15Rik	0.473691	1.05365	2.67809	0.393434	0.693999	NA	0	0.349977
4930413F20Rik	6.89374	0.0363048	0.485526	0.0747743	0.940394	NA	8.56233	9.01134
4930413G21Rik	710.783	0.0112307	0.109372	0.102683	0.918215	0.987336	801.495	807.958
4930413M19Rik	0	NA	NA	NA	NA	NA	0	0
4930414L22Rik	395.807	-0.00442379	0.0767533	-0.0576365	0.954038	0.992168	495.181	492.702
4930414N06Rik	1.31546	0.669551	1.3618	0.491666	0.622956	NA	0.776597	1.12841
4930415F15Rik	2.82302	-0.43198	0.816195	-0.529261	0.596624	NA	4.1095	3.06189
4930415L06Rik	0	NA	NA	NA	NA	NA	0	0
4930415O20Rik	5.23159	0.38842	0.733781	0.52934	0.596569	NA	3.04949	3.82678
4930417O13Rik	0.877528	-0.967633	1.63639	-0.591321	0.554306	NA	1.22331	0.603661
4930417O22Rik	1.0361	-0.572861	1.2309	-0.465399	0.641646	NA	1.87678	1.19412
4930419G24Rik	11.7557	-0.643324	0.403344	-1.59498	0.110718	NA	22.729	14.2237
4930423M02Rik	0.583072	1.82014	2.11081	0.862297	0.388524	NA	0	0.647437
4930425K10Rik	0.458208	1.00916	2.38688	0.422794	0.672446	NA	0.264824	0.542315
4930425O10Rik	0.307233	-0.38901	3.34971	-0.116133	0.907547	NA	0.226503	0
4930426D05Rik	19.4539	0.366231	0.366103	1.00035	0.31714	0.76907	26.872	34.5198
4930426L09Rik	16.3419	-0.135311	0.437961	-0.308956	0.757355	0.953017	17.1021	15.6117
4930427A07Rik	82.0244	0.120637	0.183118	0.658796	0.510026	0.874832	62.8024	67.8513
4930428D18Rik	0	NA	NA	NA	NA	NA	0	0
4930428E07Rik	0.611733	-2.12037	1.98015	-1.07081	0.284255	NA	0.982654	0
4930428G15Rik	0.034033	-0.389024	5.20139	-0.0747923	0.94038	NA	0.204198	0
4930428O21Rik	0	NA	NA	NA	NA	NA	0	0
4930429B21Rik	222.685	-0.128142	0.119073	-1.07617	0.281853	0.741009	460.518	420.254
4930429D17Rik	1.12211	0.701461	1.76462	0.397514	0.690989	NA	0.529648	0.721453
4930429F11Rik	0	NA	NA	NA	NA	NA	0	0
4930429F24Rik	30.9866	0.5271	0.347341	1.51753	0.129134	0.547127	22.1648	32.5531
4930430A15Rik	0.118128	1.0536	5.20139	0.202562	0.839478	NA	0	0.30183
4930430D24Rik	0	NA	NA	NA	NA	NA	0	0
4930430F08Rik	367.528	-0.0871444	0.0853329	-1.02123	0.307147	0.760879	442.97	418.471
4930430F21Rik	0.377884	-0.513486	3.30713	-0.155266	0.876611	NA	0.570539	0.30183
4930430J02Rik	3.64862	0.493444	0.834269	0.591468	0.554207	NA	2.25058	3.21953
4930431F12Rik	0.0686288	0	5.20139	0	1	NA	0	0
4930431P03Rik	4.34507	1.09284	1.11609	0.979169	0.327496	NA	0.71597	1.693
4930432J09Rik	0.267831	1.72579	2.87663	0.599935	0.54855	NA	0	0.590461
4930432K21Rik	74.9655	0.186365	0.187183	0.995625	0.319432	0.770214	95.1838	108.776
4930432M17Rik	0.034033	-0.389024	5.20139	-0.0747923	0.94038	NA	0.204198	0
4930433B08Rik	0.0690451	0	5.20139	0	1	NA	0	0
4930433I11Rik	0.0459266	0	5.20139	0	1	NA	0	0
4930433N12Rik	0.481319	1.05366	2.62802	0.400932	0.68847	NA	0	0.30183
4930434J06Rik	1.00929	0	1.85423	0	1	NA	0	0
4930435E12Rik	0	NA	NA	NA	NA	NA	0	0
4930438E09Rik	0.035229	0	5.20139	0	1	NA	0	0
4930440C22Rik	0.0463532	0	5.20139	0	1	NA	0	0
4930440I19Rik	0.710263	1.66514	2.39149	0.696279	0.486254	NA	0	0.480969
4930441J16Rik	0.0799596	-0.389015	5.20139	-0.0747904	0.940381	NA	0.204198	0
4930442J19Rik	0	NA	NA	NA	NA	NA	0	0
4930442L01Rik	0.046167	0	5.20139	0	1	NA	0	0
4930443O20Rik	3.17079	-0.197379	0.752156	-0.262417	0.793	NA	3.12614	2.76006
4930444F02Rik	3.18708	1.19423	0.797975	1.49658	0.134504	NA	1.98203	4.34322
4930444G20Rik	0.874177	-1.12272	1.79324	-0.626084	0.53126	NA	0.511772	0
4930444M15Rik	1.94649	0.114658	1.05098	0.109097	0.913126	NA	1.90911	2.0339
4930444P10Rik	10.5581	0.123769	0.579377	0.213624	0.83084	NA	7.94718	8.77924
4930447A16Rik	0.410548	1.00811	2.47208	0.407801	0.68342	NA	0.28527	0.542315
4930447C04Rik	109.016	0.0464847	0.215697	0.215509	0.82937	0.967345	91.4031	93.8909
4930447J18Rik	0	NA	NA	NA	NA	NA	0	0
4930447K03Rik	3.49092	0.516683	0.763091	0.677092	0.498347	NA	3.80564	5.51137
4930447N08Rik	8.88456	-0.00499235	0.460971	-0.0108301	0.991359	NA	8.89524	8.90981
4930448C13Rik	0.148824	0	5.20139	0	1	NA	0	0
4930448F12Rik	0.148503	-1.1036	5.19585	-0.212401	0.831794	NA	0.453005	0
4930448H16Rik	0.272766	0	5.20139	0	1	NA	0	0
4930448I06Rik	0.417132	1.05364	3.63503	0.289858	0.771925	NA	0	0.240484
4930448I18Rik	0	NA	NA	NA	NA	NA	0	0
4930448K20Rik	0	NA	NA	NA	NA	NA	0	0
4930449E01Rik	0.0906614	-0.389014	5.20139	-0.0747903	0.940382	NA	0.28527	0
4930449E18Rik	0.159149	1.05362	5.20139	0.202564	0.839476	NA	0	0.240484
4930449I24Rik	0	NA	NA	NA	NA	NA	0	0
4930451C15Rik	37.6471	-0.27921	0.417365	-0.668982	0.503507	0.872975	25.4122	21.0838
4930451G09Rik	97.949	0.282252	0.17058	1.65466	0.0979936	0.488942	76.0389	94.0841
4930451I11Rik	1.92403	-0.125481	0.916308	-0.136942	0.891076	NA	5.47311	5.10923
4930452A19Rik	0.312698	0	5.20139	0	1	NA	0	0
4930452B06Rik	124.193	0.166591	0.126276	1.31926	0.187083	0.636255	212.646	239.541
4930452G13Rik	6.13255	1.08111	0.56189	1.92406	0.0543472	NA	4.84963	10.1784
4930452N14Rik	0.967378	0.112222	1.29898	0.086392	0.931155	NA	1.90282	2.0339
4930453H23Rik	0	NA	NA	NA	NA	NA	0	0
4930453L07Rik	0.995192	-0.0723581	2.24632	-0.0322118	0.974303	NA	2.04198	1.99483
4930453N24Rik	503.035	-0.127825	0.0698992	-1.82871	0.067443	0.418719	473.754	433.485
4930455B14Rik	0.397813	2.03584	3.79939	0.535832	0.592075	NA	0.28527	1.20732
4930455C13Rik	8.99998	-0.305654	0.489372	-0.624584	0.532244	NA	11.7695	9.23313
4930455D15Rik	0.251885	-1.71074	4.08252	-0.419041	0.675186	NA	0.738275	0
4930455F16Rik	0.216579	-1.24699	5.19136	-0.240206	0.810171	NA	0.529648	0
4930455H04Rik	0.441979	-1.08877	2.38931	-0.455686	0.648616	NA	0.469022	0
4930455J16Rik	0.205393	0	5.20139	0	1	NA	0	0
4930456L15Rik	0.369785	1.05365	2.81734	0.373988	0.708413	NA	0	0.240484
4930459C07Rik	0.103476	0	5.20139	0	1	NA	0	0
4930459L07Rik	0	NA	NA	NA	NA	NA	0	0
4930461G14Rik	2.61237	-0.0843023	0.995187	-0.08471	0.932492	NA	2.53656	2.26118
4930463O16Rik	0.745773	1.60875	1.83078	0.878725	0.37955	NA	0.204198	0.892292
4930465K10Rik	3.19236	0.209244	0.737195	0.283839	0.776534	NA	4.33972	4.94669
4930465M20Rik	0.0715425	-0.389009	5.20139	-0.0747894	0.940382	NA	0.226503	0
4930467D21Rik	11.1118	0.0144064	0.402214	0.0358179	0.971428	NA	23.8451	23.7986
4930467E23Rik	5.60546	0.917505	0.656867	1.39679	0.162477	NA	3.83954	7.06343
4930467K11Rik	1.48526	1.48327	1.31724	1.12605	0.260145	NA	1.0879	3.14473
4930468A15Rik	0.186438	-1.01153	5.19881	-0.19457	0.845729	NA	0.408396	0
4930469G21Rik	18.9213	0.106584	0.364108	0.292725	0.769732	0.954603	23.494	25.1899
4930470H14Rik	1.58362	-0.652163	1.0202	-0.639252	0.522659	NA	4.53763	2.98787
4930470P17Rik	6.45903	0.368183	0.537073	0.685536	0.493006	NA	10.6363	13.8924
4930471C04Rik	9.03947	-0.506418	0.487194	-1.03946	0.298592	NA	10.5217	7.45326
4930471G03Rik	0.629177	1.05366	2.00955	0.524325	0.600053	NA	0	0.240484
4930471M09Rik	0.64705	0.676407	1.7595	0.384431	0.700659	NA	0.695525	1.08463
4930473A02Rik	39.2254	-0.28945	0.334125	-0.866292	0.38633	0.816623	37.2013	29.9083
4930473O22Rik	0.17179	1.05361	5.20139	0.202562	0.839477	NA	0	0.349977
4930474G06Rik	0.58908	0.819935	1.81966	0.450598	0.652279	NA	0.71783	1.29924
4930474H20Rik	0.298174	1.10001	4.85201	0.226712	0.820648	NA	0.226503	0.603661
4930474M22Rik	11.602	0.0715915	0.698137	0.102546	0.918323	NA	2.74006	2.91299
4930474N05Rik	0	NA	NA	NA	NA	NA	0	0
4930474N09Rik	2.65175	-0.420075	0.871488	-0.48202	0.629792	NA	3.28642	2.37067
4930478L05Rik	1.05216	-0.61574	2.0783	-0.296271	0.767023	NA	1.19128	0.721453
4930478P22Rik	0.48754	0.332309	2.7396	0.121298	0.903455	NA	0.28527	0.349977
4930479D17Rik	14.3806	0.428329	0.363477	1.17842	0.238629	NA	15.7392	21.1047
4930480E11Rik	0	NA	NA	NA	NA	NA	0	0
4930480G23Rik	0.248361	-1.08267	5.19651	-0.208346	0.834959	NA	0.469022	0
4930480K15Rik	2.54004	0.771886	0.796496	0.969103	0.332494	NA	2.6125	4.45272
4930480M12Rik	0.389824	1.05365	4.65498	0.226348	0.820931	NA	0	0.349977
4930481A15Rik	8.05628	1.03553	0.488398	2.12027	0.0339835	NA	6.27273	13.2449
4930482G09Rik	2.32808	1.3347	0.952326	1.40152	0.161059	NA	1.47026	3.68312
4930483J18Rik	1.29031	0.29489	1.68801	0.174697	0.861318	NA	0.511772	0.586091
4930483K19Rik	34.5589	0.0560337	0.234527	0.238922	0.811166	0.965334	41.6433	43.3691
4930483O08Rik	2.35311	1.09884	1.16233	0.945382	0.344464	NA	0.657203	1.58788
4930486F22Rik	0.104256	1.05359	5.20139	0.20256	0.839479	NA	0	0.349977
4930486I03Rik	0.554672	0.215536	2.73993	0.0786648	0.937299	NA	1.53462	1.79341
4930486L24Rik	17.3456	0.547595	0.497112	1.10155	0.270655	0.730001	4.65704	7.11682
4930487D11Rik	0.226262	0	4.16969	0	1	NA	0	0
4930487H11Rik	9.82378	-1.08698	0.742784	-1.46339	0.14336	NA	4.11068	1.89801
4930488B22Rik	0	NA	NA	NA	NA	NA	0	0
4930488L21Rik	4.88035	-0.934381	0.630007	-1.48313	0.138041	NA	9.41143	4.69276
4930500F04Rik	0.101738	0.332255	5.20139	0.063878	0.949067	NA	0.264824	0.345606
4930500J02Rik	2.85814	1.16302	0.998789	1.16443	0.24425	NA	1.41335	3.38154
4930500L23Rik	2.41883	1.05366	1.52191	0.69233	0.48873	NA	0	0.345606
4930502A04Rik	0.034033	-0.389024	5.20139	-0.0747923	0.94038	NA	0.204198	0
4930502E09Rik	2.44357	-0.72053	1.18748	-0.606772	0.544002	NA	1.50858	0.830946
4930502E18Rik	6.50887	0.295587	0.492341	0.600371	0.548259	NA	6.5457	8.21465
4930503B20Rik	3.27372	-0.152608	0.983448	-0.155177	0.876682	NA	3.67552	3.26742
4930503E14Rik	0.0815779	-1.0827	5.19651	-0.208352	0.834954	NA	0.489468	0
4930503E24Rik	0.496249	0	3.18104	0	1	NA	0	0
4930503H13Rik	0.83005	0.329157	1.65357	0.199059	0.842217	NA	0.430701	0.586091
4930503L19Rik	216.797	-0.33866	0.127645	-2.65314	0.00797461	0.130897	201.575	157.953
4930503O07Rik	0.0745728	1.05359	5.20139	0.20256	0.839479	NA	0	0.240484
4930504O13Rik	0	NA	NA	NA	NA	NA	0	0
4930505A04Rik	7.2489	0.466949	0.630244	0.740903	0.458752	NA	4.83105	6.6924
4930505G20Rik	0	NA	NA	NA	NA	NA	0	0
4930506C21Rik	63.085	-0.304359	0.195723	-1.55506	0.119933	0.531098	88.2468	70.8886
4930506M07Rik	847.087	-0.130142	0.102211	-1.27326	0.202926	0.656673	593.815	542.794
4930507D05Rik	17.984	0.179774	0.322059	0.558201	0.576707	0.900693	25.1804	28.4526
4930507D10Rik	1.36087	0.710003	1.3838	0.513084	0.607893	NA	1.86636	3.02641
4930509E16Rik	1.12582	0.295433	1.68137	0.17571	0.860522	NA	0.491327	0.586091
4930509J09Rik	2.42559	0.930862	1.0809	0.861195	0.389131	NA	1.33671	2.62436
4930509K18Rik	0.19433	-1.50677	5.17788	-0.291002	0.77105	NA	0.634899	0
4930511A02Rik	0.301361	-0.302937	2.87089	-0.10552	0.915963	NA	0.408396	0.30183
4930511E03Rik	0.566154	-0.389016	2.73831	-0.142064	0.887029	NA	0.264824	0
4930511M06Rik	17.8588	-1.04298	0.678565	-1.53704	0.124284	0.536873	4.41893	2.0601
4930512B01Rik	11.5375	0.254013	0.425767	0.5966	0.550774	NA	13.2309	15.4046
4930513D17Rik	0.828676	-2.29553	1.95448	-1.17449	0.240197	NA	1.79945	0.349977
4930513N10Rik	29.9356	0.00728154	0.257306	0.0282992	0.977424	0.996678	24.6658	24.8884
4930513O06Rik	0.181798	0	5.20139	0	1	NA	0	0
4930515B02Rik	1.46131	0	1.65575	0	1	NA	0	0
4930515G01Rik	30.6669	0.955848	0.30092	3.17642	0.00149104	0.0456778	21.8203	42.4803
4930515G16Rik	0.0325944	0	5.20139	0	1	NA	0	0
4930515L03Rik	0.801773	1.87482	1.66584	1.12545	0.260397	NA	0.430701	1.7145
4930515L19Rik	0	NA	NA	NA	NA	NA	0	0
4930517E11Rik	0.515722	-1.39156	1.76936	-0.786475	0.431589	NA	0.980795	0.30183
4930518P08Rik	0	NA	NA	NA	NA	NA	0	0
4930519D14Rik	0.131715	0.997624	5.19676	0.19197	0.847766	NA	0.204198	0.586091
4930519F09Rik	0.589167	-0.190655	1.91163	-0.0997342	0.920555	NA	0.71597	0.647437
4930519F16Rik	1.17109	0.332315	1.8516	0.179475	0.857565	NA	0.264824	0.240484
4930519F24Rik	0	NA	NA	NA	NA	NA	0	0
4930519G04Rik	2.7286	0.466776	1.02681	0.454588	0.649406	NA	1.49257	1.89363
4930519H02Rik	0.0895039	0	5.20139	0	1	NA	0	0
4930520O04Rik	18.583	-0.358463	0.390764	-0.917337	0.358966	0.796602	19.2031	15.0331
4930520P13Rik	0	NA	NA	NA	NA	NA	0	0
4930521E06Rik	0.962722	0.308195	1.89257	0.162845	0.87064	NA	0.529648	0.603661
4930522H14Rik	0.0168961	0	5.20139	0	1	NA	0	0
4930522O17Rik	0.157895	0	5.20139	0	1	NA	0	0
4930523C07Rik	146.431	0.21645	0.230861	0.93758	0.34846	0.79082	29.6592	34.9809
4930523O13Rik	0.202229	0	5.20139	0	1	NA	0	0
4930524B15Rik	1.33039	1.94467	1.17779	1.65112	0.0987146	NA	0.754292	2.88712
4930524C18Rik	0.396033	0.287186	3.23968	0.0886466	0.929363	NA	0.453005	0.586091
4930524N10Rik	0	NA	NA	NA	NA	NA	0	0
4930524O05Rik	0.51436	-0.418127	2.73192	-0.153053	0.878357	NA	0.491327	0.240484
4930524O08Rik	0.352391	-0.389022	2.7403	-0.141963	0.887109	NA	0.226503	0
4930525D18Rik	0.126755	-0.389004	5.20139	-0.0747885	0.940383	NA	0.264824	0
4930525G20Rik	27.4538	-0.027189	0.258545	-0.105162	0.916248	0.987142	35.8413	34.7027
4930525M21Rik	0.195889	-0.388996	5.20139	-0.0747869	0.940384	NA	0.226503	0
4930526I15Rik	344.495	0.135253	0.100674	1.34347	0.179118	0.628376	308.394	339.584
4930526L06Rik	3.02273	-0.670162	1.33453	-0.502169	0.615548	NA	0.95849	0.590461
4930527F14Rik	0.600591	1.05366	2.04567	0.515067	0.606506	NA	0	0.240484
4930527G23Rik	0.0377504	-0.389024	5.20139	-0.0747923	0.94038	NA	0.226503	0
4930528A17Rik	15.3283	-0.174113	0.410088	-0.424575	0.671146	NA	20.1793	17.9869
4930528D03Rik	1.22522	-0.00806417	1.1386	-0.00708252	0.994349	NA	1.88052	1.95105
4930528P14Rik	0.102032	0	5.20139	0	1	NA	0	0
4930529C04Rik	7.43963	-0.212016	0.586146	-0.361712	0.717567	NA	6.62375	5.55918
4930529K09Rik	0.229856	2.21529	5.02467	0.440882	0.659299	NA	0	0.826575
4930529L06Rik	0	NA	NA	NA	NA	NA	0	0
4930529M08Rik	52.2465	0.107569	0.249515	0.431111	0.666388	0.92868	41.5566	45.1445
4930532M18Rik	0.489719	2.00512	2.62047	0.765179	0.444165	NA	0.204198	1.18092
4930533B01Rik	1.03722	-1.01599	1.59597	-0.636598	0.524387	NA	0.797042	0.30183
4930533P14Rik	0	NA	NA	NA	NA	NA	0	0
4930538K18Rik	45.597	0.239091	0.221882	1.07756	0.28123	0.740725	54.5641	64.3329
4930539C22Rik	0	NA	NA	NA	NA	NA	0	0
4930539E08Rik	163.797	0.262282	0.227355	1.15363	0.248653	0.712082	354.027	425.105
4930539J05Rik	166.276	0.0652581	0.156872	0.415996	0.677413	0.931383	179.783	187.049
4930539M17Rik	0.731891	0.896022	1.55854	0.574911	0.565352	NA	1.06001	1.93348
4930539N22Rik	0.84143	-0.959487	1.56244	-0.614095	0.539152	NA	1.62198	0.782799
4930540M03Rik	0.129349	0	5.20139	0	1	NA	0	0
4930542C21Rik	0.225737	-0.388981	5.1728	-0.0751973	0.940058	NA	0.28527	0
4930542D17Rik	0.677002	-1.09184	2.02949	-0.537986	0.590587	NA	0.469022	0
4930543E12Rik	0.402259	-1.03062	2.49726	-0.412701	0.679825	NA	0.408396	0
4930544D05Rik	1.06642	-0.279743	1.56886	-0.178309	0.85848	NA	0.738275	0.542315
4930544G11Rik	0	NA	NA	NA	NA	NA	0	0
4930544M13Rik	0.111115	0	5.20139	0	1	NA	0	0
4930545E07Rik	0	NA	NA	NA	NA	NA	0	0
4930545H06Rik	0.536811	1.03756	2.40854	0.430785	0.666625	NA	0.839097	1.76701
4930545L23Rik	0.825925	0.304095	1.44711	0.210139	0.833559	NA	0.835364	0.997414
4930546C10Rik	0.877132	0.935762	1.64914	0.567424	0.570426	NA	0.408396	0.887921
4930546K05Rik	3.63437	0.187011	0.667991	0.279961	0.779508	NA	7.64589	8.71736
4930547E08Rik	2.34109	0.123824	1.18367	0.104611	0.916685	NA	1.76741	1.91557
4930547E14Rik	0.315627	1.05365	3.26797	0.322416	0.747138	NA	0	0.349977
4930548G14Rik	0.203563	0	5.20139	0	1	NA	0	0
4930548H24Rik	0.290508	1.72094	4.03574	0.426424	0.669799	NA	0	0.586091
4930548J01Rik	0	NA	NA	NA	NA	NA	0	0
4930548K13Rik	0.199117	1.05361	5.20139	0.202563	0.839477	NA	0	0.30183
4930549C01Rik	0.147221	-0.389005	5.20139	-0.0747886	0.940383	NA	0.264824	0
4930549G23Rik	7.6057	0.110748	0.511561	0.21649	0.828606	NA	6.68113	7.63755
4930550C14Rik	7.02368	0.230817	0.621888	0.371155	0.710522	NA	4.14666	4.82497
4930550L24Rik	0.455867	0	3.10723	0	1	NA	0	0
4930552N02Rik	0.159853	0	5.20139	0	1	NA	0	0
4930552P12Rik	2.97833	0.245876	1.08686	0.226226	0.821026	NA	1.82804	2.32723
4930553E22Rik	0.247751	0.332292	4.06473	0.0817502	0.934845	NA	0.204198	0.345606
4930554C24Rik	0	NA	NA	NA	NA	NA	0	0
4930555B11Rik	0.57743	-1.87871	2.3671	-0.793674	0.427385	NA	2.33538	0.651807
4930555G01Rik	1.26975	-2.26845	1.63502	-1.38742	0.165314	NA	2.8799	0.542315
4930556C24Rik	0.0400807	1.05358	5.20139	0.202558	0.839481	NA	0	0.240484
4930556G01Rik	0.571687	-1.90852	2.50037	-0.763296	0.445287	NA	0.816792	0
4930556J02Rik	0.0400807	1.05358	5.20139	0.202558	0.839481	NA	0	0.240484
4930556M19Rik	36.9623	0.485043	0.372868	1.30084	0.193312	0.643285	7.98206	10.8517
4930556N09Rik	0.857923	-0.464158	2.22836	-0.208296	0.834998	NA	0.570539	0.345606
4930557A04Rik	0.0333982	0	5.20139	0	1	NA	0	0
4930557J02Rik	0.413204	0	2.81301	0	1	NA	0	0
4930558C23Rik	0	NA	NA	NA	NA	NA	0	0
4930558G05Rik	0	NA	NA	NA	NA	NA	0	0
4930558J18Rik	1.7163	0.332315	1.54454	0.215154	0.829647	NA	0.264824	0.30183
4930558K02Rik	1.84724	0.687118	1.12921	0.608492	0.542861	NA	1.43194	2.24361
4930562C15Rik	14.9398	0.354543	0.41713	0.849957	0.395349	NA	9.25599	11.7004
4930562F07Rik	0.78214	0	2.05972	0	1	NA	0	0
4930563D23Rik	3.38818	0.352639	1.21584	0.290037	0.771788	NA	0.877418	1.18092
4930563E18Rik	5.03217	0.353695	0.738883	0.478689	0.63216	NA	2.58233	3.43818
4930563E22Rik	53.576	0.111764	0.191766	0.582815	0.560018	0.893189	62.3252	67.5566
4930563F08Rik	0.355064	-0.389004	3.84252	-0.101236	0.919363	NA	0.264824	0
4930563M20Rik	0.17505	1.05361	5.20139	0.202563	0.839476	NA	0	0.240484
4930564B18Rik	0.0341367	0	5.20139	0	1	NA	0	0
4930564C03Rik	0.035229	0	5.20139	0	1	NA	0	0
4930564D02Rik	0.0364507	0	5.20139	0	1	NA	0	0
4930565D16Rik	0	NA	NA	NA	NA	NA	0	0
4930565N06Rik	14.2909	0.567818	0.616534	0.920983	0.357059	NA	4.26978	6.3121
4930567H12Rik	0.382673	-0.389013	2.88352	-0.134909	0.892684	NA	0.28527	0
4930567H17Rik	0	NA	NA	NA	NA	NA	0	0
4930567J20Rik	0.0168961	0	5.20139	0	1	NA	0	0
4930567K20Rik	0	NA	NA	NA	NA	NA	0	0
4930568D16Rik	0.320019	-0.363758	3.30299	-0.11013	0.912307	NA	0.489468	0.345606
4930568E12Rik	0	NA	NA	NA	NA	NA	0	0
4930568G15Rik	1.77045	0.0503275	1.07422	0.0468501	0.962633	NA	1.77784	1.76701
4930570G19Rik	183.202	-0.00906001	0.173299	-0.0522797	0.958306	0.992623	242.781	241.526
4930571K23Rik	0	NA	NA	NA	NA	NA	0	0
4930571O06Rik	0.304826	-0.389024	2.50458	-0.155325	0.876565	NA	0.226503	0
4930572K03Rik	0	NA	NA	NA	NA	NA	0	0
4930572O03Rik	2.58938	-0.389028	1.58373	-0.24564	0.805961	NA	0.264824	0
4930572O13Rik	1.48831	-0.349544	1.22673	-0.284939	0.775691	NA	4.37806	3.50379
4930573O16Rik	0.165967	0.332274	5.20139	0.0638817	0.949064	NA	0.204198	0.240484
4930577N17Rik	31.5644	-0.0794838	0.296031	-0.268499	0.788316	0.959361	21.7773	21.1889
4930578C19Rik	24.5753	-0.277138	0.42683	-0.649294	0.516148	0.877117	8.37717	6.89794
4930578E11Rik	1.35635	0.905421	1.4939	0.606079	0.544462	NA	0.491327	0.931697
4930578I06Rik	0.268338	-1.73604	3.41304	-0.50865	0.610998	NA	0.754292	0
4930578M01Rik	38.7649	0.0176584	0.342637	0.0515369	0.958898	0.992825	12.0567	12.3303
4930578N18Rik	0.102939	-0.389002	5.20139	-0.0747881	0.940383	NA	0.226503	0
4930579F01Rik	0.0806592	0	5.20139	0	1	NA	0	0
4930579G18Rik	148.533	-0.0963722	0.145043	-0.664437	0.506411	0.873786	147.859	137.71
4930579G24Rik	66.0007	-0.285896	0.212997	-1.34226	0.179513	0.629114	47.2287	38.6934
4930579K19Rik	18.355	0.0949253	0.363985	0.260795	0.794251	0.959964	18.894	20.5543
4930581F22Rik	117.265	-0.24661	0.170919	-1.44284	0.149065	0.581034	75.1175	63.2277
4930583K01Rik	0.959494	2.60386	1.64052	1.58721	0.112465	NA	0.28527	1.78021
4930583P06Rik	0.486638	0	3.34441	0	1	NA	0	0
4930584F24Rik	0.106569	0	5.20139	0	1	NA	0	0
4930590J08Rik	14.9274	-0.0272886	0.348259	-0.0783573	0.937544	NA	21.6537	21.0085
4930590L20Rik	0.14637	-0.389005	5.20139	-0.0747886	0.940383	NA	0.28527	0
4930591A17Rik	0.41982	1.90101	3.18047	0.597714	0.550031	NA	0	0.695584
4930592A05Rik	0.233091	-1.70271	4.13639	-0.411641	0.680603	NA	0.733847	0
4930592I03Rik	0.0998467	0	5.20139	0	1	NA	0	0
4930593A02Rik	4.84283	-0.0407168	0.61393	-0.0663216	0.947122	NA	5.08958	5.07428
4930593C16Rik	1.49444	1.16699	1.17026	0.997204	0.318666	NA	0.922028	2.14339
4930594C11Rik	3.11016	1.05894	0.785457	1.34819	0.177597	NA	1.98203	4.21694
4930595M18Rik	0.0901284	0	5.20139	0	1	NA	0	0
4930596D02Rik	0	NA	NA	NA	NA	NA	0	0
4930596I21Rik	0.487273	0	1.97013	0	1	NA	0	0
4930597G03Rik	4.38869	-0.389027	1.4898	-0.261128	0.793994	NA	0.204198	0
4930598F16Rik	0	NA	NA	NA	NA	NA	0	0
4930599N23Rik	24.0542	0.0544732	0.437895	0.124398	0.901	0.982785	6.83283	7.10756
4931402G19Rik	5.70035	-0.956784	0.756075	-1.26546	0.205706	NA	5.203	2.81703
4931403E22Rik	16.1778	-0.198712	0.316665	-0.627517	0.53032	0.882087	21.9966	18.6018
4931403G20Rik	19.1702	-0.361973	0.370234	-0.977686	0.328229	0.775374	21.118	16.1227
4931406B18Rik	1.50108	-1.61338	1.59502	-1.01151	0.31177	NA	1.08162	0.345606
4931406C07Rik	618.786	-0.0673938	0.0790807	-0.852216	0.394094	0.820675	548.353	522.543
4931406H21Rik	3.03818	0.350733	0.968293	0.362218	0.717189	NA	1.42751	1.88971
4931406P16Rik	1811.83	-0.0373684	0.0788664	-0.473819	0.635629	0.917402	1278.07	1243.93
4931408C20Rik	5.39965	-0.389025	1.52138	-0.255706	0.798178	NA	0.204198	0
4931408D14Rik	10.3625	0.169343	0.418791	0.404363	0.685946	NA	13.9892	15.2912
4931409K22Rik	2.96621	1.71715	1.08844	1.57762	0.114653	NA	2.06497	6.684
4931412M21	0.846452	-1.03534	2.306	-0.448978	0.653447	NA	0.408396	0
4931414P19Rik	197.124	-0.0299288	0.106261	-0.281654	0.778209	0.957797	199.744	195.739
4931417E11Rik	0	NA	NA	NA	NA	NA	0	0
4931419H13Rik	1.58128	0.195255	1.12985	0.172816	0.862796	NA	1.59339	1.93785
4931420L22Rik	0.309219	1.05364	3.93607	0.267688	0.788939	NA	0	0.240484
4931423N10Rik	2.73464	0.585729	0.721434	0.811896	0.416851	NA	3.29575	5.25342
4931428F04Rik	441.301	-0.0812462	0.103057	-0.788365	0.430483	0.840923	629.186	593.691
4931428L18Rik	0.301696	0.432246	3.93716	0.109786	0.912579	NA	0.489468	0.647437
4931429I11Rik	75.6964	0.811544	0.333134	2.43609	0.0148472	0.188413	11.1068	19.2769
4931429L15Rik	6.9263	0.219122	0.517701	0.423261	0.672105	NA	6.56358	7.64551
4931429P17Rik	0.455552	1.16425	2.7767	0.419291	0.675003	NA	0.28527	0.695584
4931430N09Rik	0.40894	1.05365	2.47557	0.425621	0.670384	NA	0	0.30183
4931431B13Rik	0	NA	NA	NA	NA	NA	0	0
4931431C16Rik	8.90189	0.278197	0.493678	0.563519	0.573081	NA	9.67882	11.6655
4931431F19Rik	0.0441374	-0.389024	5.20139	-0.0747923	0.94038	NA	0.264824	0
4931440F15Rik	61.3401	-0.221549	0.210032	-1.05483	0.291502	0.749153	95.1206	81.8091
4931440J10Rik	4.31758	0.6997	0.77473	0.903154	0.366444	NA	3.78147	5.99264
4931440L10Rik	1.16905	-1.69778	1.67595	-1.01302	0.311051	NA	0.738275	0
4931440P22Rik	26.7231	-0.206033	0.323434	-0.637018	0.524113	0.880046	19.5433	16.4803
4932411E22Rik	43.1849	0.570138	0.38935	1.46433	0.143103	0.570893	52.221	78.1707
4932411N23Rik	0.0532845	0	5.20139	0	1	NA	0	0
4932412D23Rik	0.973176	0.86372	1.25044	0.690734	0.489733	NA	0.980795	1.72324
4932413F04Rik	0.481092	-1.6709	2.61997	-0.637755	0.523633	NA	0.71597	0
4932414J04Rik	0.034033	-0.389024	5.20139	-0.0747923	0.94038	NA	0.204198	0
4932414N04Rik	1.21394	0	1.78768	0	1	NA	0	0
4932415M13Rik	0.274378	0	4.88899	0	1	NA	0	0
4932416H05Rik	169.997	0.140868	0.127652	1.10352	0.2698	0.72907	161.399	178.868
4932416K20Rik	0	NA	NA	NA	NA	NA	0	0
4932418E24Rik	31.6805	0.364067	0.425767	0.855085	0.392504	0.820174	10.1383	14.029
4932429P05Rik	0	NA	NA	NA	NA	NA	0	0
4932435O22Rik	4.7508	0.240798	0.58649	0.410575	0.681384	NA	4.27281	5.02561
4932438A13Rik	3608.37	-0.00792168	0.0945612	-0.083773	0.933237	0.989557	4227.6	4203.74
4932438H23Rik	52.1991	-0.376993	0.283678	-1.32895	0.183865	0.634209	24.9959	19.036
4932441J04Rik	18.1152	0.0215236	0.292315	0.0736315	0.941304	0.99076	28.9638	29.249
4932443I19Rik	10.0931	-0.111708	0.645356	-0.173095	0.862577	NA	4.86753	4.64995
4932702P03Rik	1.61737	-0.0603877	1.35704	-0.0444995	0.964506	NA	1.20544	1.08463
4933400A11Rik	3.32586	1.01556	1.52422	0.666283	0.50523	NA	0.264824	0.480969
4933400B14Rik	0.408196	-0.213685	4.60272	-0.0464259	0.962971	NA	0.794473	0.695584
4933400C23Rik	0.594427	0.838207	1.67533	0.500324	0.616847	NA	0.430701	0.782799
4933400F21Rik	0.856608	-0.125105	1.52091	-0.0822569	0.934442	NA	1.03956	0.936068
4933400L20Rik	0	NA	NA	NA	NA	NA	0	0
4933401B06Rik	0.162807	0	5.20139	0	1	NA	0	0
4933401D09Rik	0.174511	0	5.20139	0	1	NA	0	0
4933401H06Rik	0.586736	-1.42057	2.68473	-0.529131	0.596714	NA	0.998671	0.349977
4933402C06Rik	0.291185	-0.389015	3.29425	-0.118089	0.905997	NA	0.204198	0
4933402D24Rik	20.2717	-0.105445	0.31062	-0.339465	0.73426	0.946765	32.81	30.821
4933402E13Rik	0.208059	0.332298	3.50628	0.094772	0.924496	NA	0.28527	0.240484
4933402J07Rik	5.56345	-0.370068	1.49117	-0.248174	0.804	NA	0.408396	0.240484
4933402J10Rik	0	NA	NA	NA	NA	NA	0	0
4933402J15Rik	0.415854	1.05365	3.25285	0.323917	0.746001	NA	0	0.349977
4933402N03Rik	0.0400807	1.05358	5.20139	0.202558	0.839481	NA	0	0.240484
4933402N22Rik	0.112836	0	5.20139	0	1	NA	0	0
4933402P03Rik	1.21414	-1.37945	1.57446	-0.876142	0.380953	NA	0.964778	0.240484
4933403O08Rik	0.476137	0.008268	1.79825	0.00459781	0.996331	NA	0.95849	0.997414
4933404G15Rik	0.0801614	1.63967	5.19794	0.315446	0.752423	NA	0	0.480969
4933404K08Rik	0.202928	-1.99902	5.15561	-0.387736	0.698211	NA	0.897864	0
4933404O12Rik	521.356	0.0781338	0.0749515	1.04246	0.297199	0.753324	700.296	739.202
4933405D12Rik	1.69279	0.745357	0.965832	0.771726	0.440277	NA	2.3075	3.94535
4933405E24Rik	0.0494904	0	5.20139	0	1	NA	0	0
4933405L10Rik	7.11664	-0.274743	0.553711	-0.496185	0.619764	NA	8.82646	7.38798
4933405O20Rik	0.068066	-1.01156	5.19881	-0.194576	0.845725	NA	0.408396	0
4933406C10Rik	37.8206	0.133299	0.219414	0.607523	0.543504	0.888312	43.3267	47.5775
4933406D12Rik	0.0431164	0	5.20139	0	1	NA	0	0
4933406F09Rik	0.0513882	0	5.20139	0	1	NA	0	0
4933406G16Rik	0.138809	0	5.20139	0	1	NA	0	0
4933406I18Rik	24.5753	0.0753166	0.259535	0.290198	0.771665	0.955195	31.5291	33.4264
4933406J08Rik	0.0628227	0	5.20139	0	1	NA	0	0
4933406J10Rik	0.646301	-0.389023	2.29036	-0.169853	0.865126	NA	0.204198	0
4933406K04Rik	0.227136	1.05363	5.165	0.203994	0.838358	NA	0	0.30183
4933406M09Rik	0.27561	2.16105	3.3229	0.650352	0.515465	NA	0	0.782799
4933407E24Rik	1.83186	-0.691863	1.05511	-0.655725	0.512001	NA	2.43061	1.47838
4933407G14Rik	1.11406	-2.08028	2.03616	-1.02167	0.306938	NA	0.944332	0
4933407I05Rik	11.3669	0.20374	0.322161	0.632418	0.527114	NA	30.2042	34.6334
4933407K13Rik	201.751	-0.136472	0.186317	-0.732472	0.46388	0.857914	186.048	169.438
4933407L21Rik	20.6318	-0.0814817	0.359415	-0.226706	0.820652	0.966434	33.0127	31.495
4933408B17Rik	20.9908	-0.260165	0.46255	-0.562458	0.573804	0.899112	18.3349	14.9892
4933408J17Rik	1.72829	-0.0335783	1.2393	-0.0270946	0.978384	NA	1.36501	1.29487
4933408N05Rik	1.45053	1.18499	1.22433	0.967871	0.333109	NA	0.920168	2.18271
4933409G03Rik	0.506514	0	2.79298	0	1	NA	0	0
4933409K07Rik	132.948	-0.603715	0.166713	-3.62127	0.000293156	0.0136339	222.179	145.419
4933411E08Rik	0.132232	0	5.20139	0	1	NA	0	0
4933411G06Rik	0	NA	NA	NA	NA	NA	0	0
4933411G11Rik	0.382284	0	2.75174	0	1	NA	0	0
4933411K16Rik	4.94724	-1.97934	1.26574	-1.56379	0.117868	NA	1.52903	0.345606
4933411K20Rik	942.921	-0.0238034	0.0625052	-0.380823	0.703335	0.938035	889.636	877.485
4933412E12Rik	156.891	-0.0107526	0.131286	-0.0819019	0.934725	0.989557	123.022	121.828
4933412E24Rik	1.21112	0	1.75305	0	1	NA	0	0
4933412O06Rik	62.4723	0.438705	0.21433	2.04687	0.0406712	0.329743	46.2635	63.4777
4933413G19Rik	13.0523	-0.0534597	0.372942	-0.143346	0.886017	NA	14.2882	13.6076
4933413J09Rik	9.40514	-0.784196	0.716119	-1.09506	0.273489	NA	6.62631	3.93268
4933413L06Rik	1.22033	0.37564	1.42757	0.263132	0.792449	NA	1.04142	1.3868
4933415F23Rik	0.177968	-0.952383	5.16948	-0.184232	0.853831	NA	0.71783	0.349977
4933416C03Rik	0.186152	1.05361	5.20139	0.202564	0.839476	NA	0	0.345606
4933416E03Rik	0.035229	0	5.20139	0	1	NA	0	0
4933416I08Rik	0.16438	1.31159	5.18581	0.252919	0.800331	NA	0.264824	0.721453
4933416M06Rik	0.798171	-1.76883	1.91468	-0.923825	0.355577	NA	0.794473	0
4933416M07Rik	1.15445	1.70703	1.7098	0.998378	0.318096	NA	0	0.480969
4933417A18Rik	0.253681	0	3.3962	0	1	NA	0	0
4933417D19Rik	34.1442	0.111815	0.250031	0.447206	0.654727	0.924704	37.3963	40.8597
4933417E11Rik	1.17816	1.60899	1.66349	0.967234	0.333427	NA	0.204198	0.887921
4933417G07Rik	0.259416	-1.14355	3.36537	-0.339798	0.734009	NA	0.491327	0
4933417O13Rik	2.4943	0.983728	0.838714	1.1729	0.240836	NA	3.07967	6.15017
4933421I07Rik	0	NA	NA	NA	NA	NA	0	0
4933421O10Rik	281.043	-0.0924514	0.081515	-1.13416	0.256725	0.718804	273.856	256.29
4933422A05Rik	1.47061	-0.639237	1.0218	-0.625602	0.531576	NA	2.42875	1.62728
4933422H20Rik	2.79459	-0.675672	0.942647	-0.716782	0.473509	NA	2.2729	1.36889
4933424G05Rik	1.53925	0.799156	1.08739	0.734928	0.462383	NA	1.38919	2.5152
4933424G06Rik	16.6601	0.375964	0.355994	1.0561	0.290925	0.748605	27.1094	35.4448
4933425B07Rik	0.591459	-0.389024	2.10941	-0.184423	0.853681	NA	0.28527	0
4933425L06Rik	1.12781	-0.2225	1.22188	-0.182096	0.855507	NA	1.85705	1.53973
4933426M11Rik	3018.86	0.075574	0.0705597	1.07106	0.28414	0.743174	1463.53	1541.15
4933427D06Rik	1.03504	2.38881	1.80642	1.3224	0.186034	NA	0.430701	2.49774
4933427D14Rik	896.035	-0.098886	0.0704441	-1.40375	0.160393	0.600134	1234.79	1151.02
4933427E11Rik	5.89946	0.00196916	0.610034	0.00322794	0.997424	NA	5.98746	6.19823
4933427E13Rik	0.281077	0.972795	3.92565	0.247805	0.804286	NA	0.469022	0.940439
4933427G17Rik	21.8626	0.651889	0.451042	1.44529	0.148375	0.579836	5.88595	9.69303
4933427I22Rik	1.79522	0.311805	1.12486	0.277194	0.781631	NA	1.42937	1.76264
4933428C19Rik	1.01765	0.714623	1.68525	0.424045	0.671533	NA	1.59968	2.64619
4933428G20Rik	62.1535	-0.261993	0.220125	-1.1902	0.233968	0.696882	79.4869	65.2716
4933429K18Rik	0.139163	0	5.20139	0	1	NA	0	0
4933429O19Rik	28.7059	-0.381978	1.44118	-0.265046	0.790974	0.959667	0.489468	0.240484
4933430H16Rik	0.155319	0	5.20139	0	1	NA	0	0
4933430I17Rik	10.1337	-0.467125	0.416403	-1.12181	0.261944	NA	12.7503	9.26449
4933430M04Rik	0.353132	-0.42158	3.23448	-0.130339	0.896298	NA	0.511772	0.30183
4933430N04Rik	0.406012	-0.344639	2.69682	-0.127795	0.898312	NA	0.430701	0.240484
4933431E20Rik	1689.91	-0.00993804	0.0797915	-0.12455	0.90088	0.982785	2296.27	2280.88
4933431G14Rik	6.79167	0.673874	0.556152	1.21167	0.225638	NA	5.06613	7.96926
4933432G23Rik	0.114154	0	5.20139	0	1	NA	0	0
4933432I03Rik	7.012	0.0227132	0.703266	0.0322967	0.974235	NA	5.16251	5.25334
4933432I09Rik	55.5553	-0.131623	0.23377	-0.563043	0.573405	0.898847	77.6495	70.0693
4933432K03Rik	0.969496	0.315047	1.27283	0.247516	0.804509	NA	0.95849	1.17655
4933433C11Rik	2.30576	0.00790143	0.974487	0.00810829	0.993531	NA	2.73562	2.71628
4933433F19Rik	0.0459266	0	5.20139	0	1	NA	0	0
4933433G08Rik	0	NA	NA	NA	NA	NA	0	0
4933433G15Rik	6.19839	-0.480983	0.605754	-0.794023	0.427182	NA	6.24484	4.37817
4933433G19Rik	10.5456	0.497976	0.410517	1.21305	0.225112	NA	8.72308	12.6283
4933433H22Rik	1.3472	1.05366	2.13777	0.492879	0.622098	NA	0	0.240484
4933434E20Rik	1447.92	0.0412052	0.052164	0.789916	0.429577	0.840768	1440.71	1481.32
4933434I20Rik	0.391759	-0.415592	2.4866	-0.167133	0.867266	NA	0.511772	0.240484
4933436E23Rik	0.171454	-0.388995	5.20139	-0.0747867	0.940384	NA	0.226503	0
4933436H12Rik	0.504758	1.12709	2.15755	0.522395	0.601395	NA	0.204198	0.695584
4933436I01Rik	0	NA	NA	NA	NA	NA	0	0
4933438B17Rik	0.0879876	0	5.20139	0	1	NA	0	0
4933438K21Rik	12.7056	0.362279	0.629697	0.575322	0.565074	NA	4.77829	5.99629
4933439C10Rik	286.497	-0.162131	0.124717	-1.29999	0.193603	0.643633	424.802	377.812
4933439K11Rik	11.7614	0.344247	0.436092	0.789392	0.429883	NA	7.76785	10.0958
4933440J02Rik	0.0803037	0	5.20139	0	1	NA	0	0
4933440M02Rik	0.348023	2.6733	3.14787	0.84924	0.395748	NA	0	1.13278
5031410I06Rik	6.96979	-0.365347	0.674293	-0.541823	0.587941	NA	4.29954	3.41632
5031414D18Rik	88.0663	-0.170301	0.209635	-0.812366	0.416581	0.835037	58.0407	50.9515
5031425E22Rik	424.54	-0.1545	0.0727268	-2.12439	0.0336376	0.296075	400.109	359.186
5031425F14Rik	7.09734	-0.705223	0.931199	-0.757328	0.448854	NA	2.41459	1.37326
5031426D15Rik	52.0842	0.144068	0.219811	0.655418	0.512199	0.875813	55.8007	61.8925
5031434C07Rik	1.23658	-1.459	1.54571	-0.943905	0.345218	NA	1.62198	0.542315
5031434O11Rik	60.8796	0.217238	0.214818	1.01127	0.311888	0.76587	45.8749	53.4814
5031439G07Rik	3906.24	0.0266705	0.0687365	0.38801	0.698008	0.93658	3753.9	3824.08
5033403H07Rik	0.35263	1.05365	3.8807	0.27151	0.785999	NA	0	0.30183
5033404E19Rik	7.18214	-0.146206	0.490165	-0.298278	0.765491	NA	11.455	10.4631
5033406O09Rik	1.68194	0.601488	1.13943	0.527886	0.597578	NA	0.980795	1.37326
5133400J02Rik	0.87675	-0.374337	1.75358	-0.21347	0.83096	NA	0.489468	0.349977
5330411J11Rik	0.673745	-0.432034	1.55265	-0.278255	0.780816	NA	1.65216	1.24227
5330413P13Rik	73.8474	0.125035	0.246458	0.507328	0.611925	0.910623	30.1663	33.4491
5330417C22Rik	639.25	0.0585527	0.496511	0.117928	NA	NA	1001.43	1042.92
5330426P16Rik	61.1584	-0.340237	0.262921	-1.29407	0.195643	0.64618	43.7902	35.55
5330434G04Rik	90.3529	-0.134566	0.24549	-0.548152	0.583587	0.902861	144.787	132.255
5330439B14Rik	0.124379	0	5.20139	0	1	NA	0	0
5430401F13Rik	0.730443	0.172641	2.05171	0.0841449	0.932941	NA	0.570539	0.480969
5430402E10Rik	0.532822	0	3.45718	0	1	NA	0	0
5430402O13Rik	21.9804	0.489816	0.355286	1.37865	0.168002	0.611272	19.1093	27.5449
5430403N17Rik	2.76425	-2.55801	0.890895	-2.87128	0.00408811	NA	7.27208	1.24227
5430405H02Rik	61.3561	0.459361	0.186342	2.46514	0.0136958	0.179464	50.6086	70.0426
5430416N02Rik	142.687	0.0193056	0.121348	0.159093	0.873595	0.976543	163.232	165.44
5430416O09Rik	61.1242	0.120328	0.256434	0.469238	0.6389	0.918696	31.501	33.7619
5430417L22Rik	1449.19	0.0235345	0.0769619	0.305794	0.759761	0.953415	1343.01	1363.31
5430419D17Rik	38.7058	0.911988	1.32858	0.686437	0.492438	0.870095	0.430701	0.936068
5430421F17Rik	7.25763	-0.285664	0.62971	-0.453644	0.650085	NA	6.21652	5.10442
5430421N21Rik	3.15657	0	1.53513	0	1	NA	0	0
5430425K12Rik	1.82191	1.05366	1.63618	0.643976	0.519591	NA	0	0.240484
5430427M07Rik	0.119702	0	5.20139	0	1	NA	0	0
5430427O19Rik	32.5761	0.392439	0.475648	0.825063	0.409336	0.831592	5.13048	6.67483
5430428K19Rik	0.035229	0	5.20139	0	1	NA	0	0
5430434I15Rik	0.142433	0.332265	5.20139	0.0638799	0.949066	NA	0.226503	0.349977
5430435G22Rik	393.602	-0.228745	0.212788	-1.07499	0.282378	0.741192	52.2105	44.4538
5430437J10Rik	4.93489	1.78089	1.52957	1.16431	0.2443	NA	0	0.691213
5430440P10Rik	0.671546	-0.18896	1.97437	-0.0957066	0.923754	NA	0.733847	0.695584
5530400C23Rik	0	NA	NA	NA	NA	NA	0	0
5530401A14Rik	0.858559	0.58661	1.58313	0.370538	0.710982	NA	1.02354	1.49158
5530601H04Rik	329.535	0.02249	0.0927015	0.242607	0.80831	0.964426	375.924	382.885
5730403I07Rik	4.06716	0.389548	0.962168	0.404865	0.685577	NA	1.55507	2.209
5730405O15Rik	36.6938	0.0504758	0.236658	0.213286	0.831104	0.967626	32.1848	33.6238
5730408K05Rik	20.4104	0.933101	0.392922	2.37477	0.0175598	0.20929	6.39841	12.3567
5730409E04Rik	2285.17	0.134088	0.0552367	2.42752	0.0152025	0.190761	2964.08	3250.9
5730412P04Rik	1.87085	0.129071	1.13363	0.113857	0.909352	NA	1.36689	1.58788
5730416F02Rik	0.380669	1.05365	3.14727	0.334782	0.737789	NA	0	0.240484
5730420D15Rik	3.61058	-0.0199753	0.74529	-0.0268021	0.978618	NA	3.51037	3.34581
5730422E09Rik	9.14509	0.158693	0.376059	0.42199	0.673032	NA	13.9167	15.4535
5730435O14Rik	1.90936	0.0960291	0.990589	0.0969414	0.922773	NA	2.32793	2.38387
5730455P16Rik	1860.55	0.100415	0.0472614	2.12468	0.0336132	0.296027	2130.37	2286.53
5730457N03Rik	0.601078	-0.389023	2.0621	-0.188654	0.850364	NA	0.204198	0
5730460C07Rik	0.488583	0	2.6119	0	1	NA	0	0
5730480H06Rik	30.9851	0.248726	0.342873	0.725416	0.468197	0.859704	25.3989	30.225
5730488B01Rik	2.1403	0.278878	1.26193	0.220994	0.825097	NA	0.938045	1.06706
5730507C01Rik	23.648	0.0441308	0.326245	0.135269	0.892399	0.981496	17.6908	18.2573
5730508B09Rik	144.422	-0.187784	0.172391	-1.08929	0.276025	0.735301	85.2432	73.508
5730522E02Rik	40.2449	0.0286245	0.228691	0.125167	0.900392	0.982785	56.5996	57.7851
5730559C18Rik	87.8741	0.157296	0.167866	0.937031	0.348743	0.79082	86.7915	97.2064
5830403L16Rik	32.0192	-0.405065	0.272636	-1.48574	0.137349	0.561313	63.8337	48.2064
5830411N06Rik	7.97687	-0.251105	1.00265	-0.250441	0.802246	NA	1.53532	1.34739
5830415F09Rik	54.445	-0.037165	0.239781	-0.154996	0.876825	0.977214	30.7343	29.9147
5830416I19Rik	0.943935	-1.93855	1.6706	-1.16039	0.245889	NA	1.4115	0.349977
5830416P10Rik	38.9335	0.0259641	0.274629	0.0945426	0.924678	0.988588	22.9258	23.3838
5830417I10Rik	3043.33	0.0377796	0.0954758	0.395698	0.692328	0.935306	3273.06	3357.63
5830418K08Rik	611.827	0.0211277	0.0803847	0.262832	0.79268	0.95984	626.887	637.328
5830418P13Rik	12.5638	0.496641	0.319976	1.55212	0.120634	NA	24.7192	35.2118
5830428M24Rik	6.1324	-1.10682	1.46113	-0.757507	0.448746	NA	0.491327	0
5830432E09Rik	13.325	-0.0413173	0.77814	-0.0530974	0.957654	NA	2.16393	2.01633
5830444B04Rik	16.8354	-1.17537	0.505943	-2.32313	0.0201724	0.22542	12.7065	5.60287
5830454E08Rik	24.0922	0.0455088	0.296318	0.153581	0.87794	0.977735	24.9015	25.5925
5830473C10Rik	2.57787	0.497118	1.02238	0.486238	0.626799	NA	2.6125	3.74864
5930403L14Rik	1227.05	0.114291	0.120401	0.949249	0.342494	0.787468	955.385	1034.76
5930412G12Rik	72.1155	0.171906	0.189623	0.906566	0.364636	0.802386	102.189	114.952
5930430L01Rik	252.817	0.337249	0.155429	2.1698	0.0300221	0.281346	76.0541	97.3827
5930438M14Rik	2.38096	-0.274317	0.797679	-0.343894	0.730926	NA	5.20781	4.18146
6030407O03Rik	7.05528	1.15573	0.64977	1.77867	0.0752943	NA	3.276	7.57202
6030408B16Rik	4.9878	-0.420693	0.715627	-0.587866	0.556622	NA	3.67437	2.70745
6030419C18Rik	4012.81	-0.0599445	0.314785	-0.19043	0.848972	0.972264	5304.98	5089
6030440G07Rik	0.685436	-0.372529	1.8677	-0.199459	0.841904	NA	0.469022	0.240484
6030443J06Rik	18.5182	0.637202	0.348461	1.82862	0.0674572	0.418719	13.9539	21.2833
6030458C11Rik	1893.95	-0.0727091	0.0622824	-1.16741	0.243045	0.707264	1950.49	1854.89
6030466F02Rik	2.11499	-0.447167	1.14397	-0.390891	0.695878	NA	1.74137	1.34302
6030468B19Rik	1.68824	-1.35496	1.48494	-0.912471	0.361521	NA	0.922028	0.30183
6030469F06Rik	0.128252	0	5.20139	0	1	NA	0	0
6030498E09Rik	0.994793	-0.587754	1.56139	-0.376429	0.706598	NA	0.899723	0.647437
6230400D17Rik	49.6625	0.0785679	0.202175	0.388613	0.697562	0.936367	59.2697	62.8249
6330403A02Rik	10203.5	0.201944	0.294459	0.685815	0.49283	0.870095	7105.38	8173.22
6330403K07Rik	2504.03	0.160123	0.606945	0.263819	NA	NA	3560.87	3978.93
6330407A03Rik	3.21078	2.30301	1.51384	1.52131	0.128183	NA	0	0.826575
6330408A02Rik	390.06	0.144953	0.0883055	1.64149	0.100696	0.494079	411.814	455.231
6330409D20Rik	25.403	0.16267	0.268673	0.605455	0.544876	0.88849	40.4808	45.1498
6330410L21Rik	4.06217	-0.122998	0.846169	-0.145358	0.884428	NA	3.88044	3.60876
6330415B21Rik	5.08777	0.229946	0.605933	0.379491	0.704323	NA	5.79927	6.63944
6330416G13Rik	456.693	0.101567	0.0956578	1.06178	0.288337	0.746543	429.301	459.072
6330418K02Rik	20.0305	0.0799341	0.395315	0.202203	0.839758	0.9699	17.2713	18.5596
6330419J24Rik	460.151	0.084833	0.106517	0.796425	0.425785	0.839883	644.237	684.767
6330549D23Rik	26.1271	0.215289	0.283009	0.760713	0.446828	0.850237	19.8223	23.4631
6430411K18Rik	0	NA	NA	NA	NA	NA	0	0
6430503K07Rik	4.29745	-0.00253853	0.672181	-0.00377656	0.996987	NA	6.67809	6.56971
6430531B16Rik	24.5389	0.690524	0.416891	1.65637	0.0976478	0.488239	10.7129	17.3417
6430548M08Rik	7280.73	0.18599	0.137897	1.34876	0.177414	0.626038	11010.2	12525.6
6430550D23Rik	30.5441	0.114555	0.289317	0.395949	0.692143	0.935306	28.3938	30.8723
6430562O15Rik	4.28034	0.915257	0.741055	1.23507	0.216803	NA	2.7382	5.22669
6430571L13Rik	167.906	0.0102043	0.172248	0.0592422	0.952759	0.991983	152.931	153.691
6430573F11Rik	204.689	-0.159994	0.134282	-1.19147	0.233468	0.696427	253.636	227.205
6430584L05Rik	148.114	-0.156861	0.133931	-1.17121	0.241515	0.706413	297.689	266.691
6430706D22Rik	0	NA	NA	NA	NA	NA	0	0
6430710C18Rik	1.62224	1.79241	1.61339	1.11096	0.266585	NA	0	0.695584
6530402F18Rik	607.541	0.01571	0.107	0.146822	0.883273	0.978855	612.684	619.885
6530411M01Rik	12.2429	-0.0117564	0.446186	-0.0263486	0.978979	NA	16.2651	16.2499
6720416L17Rik	2.04446	-0.908136	0.946528	-0.959439	0.337338	NA	3.47203	1.84156
6720468P15Rik	3.20053	-0.0281788	0.744103	-0.0378695	0.969792	NA	5.98303	5.90907
6720483E21Rik	10.7894	0.462065	0.446108	1.03577	0.30031	NA	9.61121	13.525
6720489N17Rik	94.324	-0.0884784	0.195024	-0.453679	0.65006	0.922736	80.8294	75.6041
6820408C15Rik	59.0516	0.134029	0.205384	0.652579	0.514028	0.876163	52.0278	58.0318
6820431F20Rik	3907.37	-0.151264	0.0644048	-2.34864	0.0188423	0.216825	4109.94	3700.62
7420426K07Rik	0	NA	NA	NA	NA	NA	0	0
7420461P10Rik	0.594281	-1.54616	2.47283	-0.625258	0.531802	NA	0.634899	0
7420700N18Rik	0.123046	-1.71153	5.1677	-0.331197	0.740495	NA	0.738275	0
7420701I03Rik	0	NA	NA	NA	NA	NA	0	0
7530416G11Rik	0.845238	2.39418	2.35903	1.0149	0.310154	NA	0.264824	1.55293
7630403G23Rik	0.110455	1.0536	5.20139	0.202561	0.839478	NA	0	0.349977
8030411F24Rik	0.51147	-0.776291	2.71586	-0.285836	0.775004	NA	0.612594	0.349977
8030423F21Rik	4.99184	-0.160653	0.962945	-0.166835	0.8675	NA	2.00993	1.9992
8030423J24Rik	1.18968	0.370937	1.32471	0.280013	0.779467	NA	1.8991	2.48017
8030442B05Rik	1.23518	-0.230575	1.31712	-0.17506	0.861033	NA	1.31441	1.13278
8030443G20Rik	0.201885	1.93547	5.1909	0.372859	0.709254	NA	0	0.691213
8030462N17Rik	772.64	-0.0790992	0.0895087	-0.883704	0.376856	0.810501	1002.8	947.131
8430408G22Rik	177.151	1.9213	0.32852	5.84835	4.96466e-09	7.21025e-07	55.9103	212.472
8430419L09Rik	5128.82	0.0558605	0.151855	0.367854	0.712982	0.940469	7716.4	8021.13
8430422H06Rik	0.355596	-0.389013	3.25882	-0.119372	0.90498	NA	0.28527	0
8430423G03Rik	3.21833	-2.09013	1.31836	-1.5854	0.112876	NA	0.922028	0
8430426J06Rik	7.74582	0.827089	0.552979	1.4957	0.134732	NA	4.06675	7.22597
8430427H17Rik	1584.82	0.0365243	0.0521738	0.70005	0.483896	0.86633	1769.56	1817.05
8430429K09Rik	129.434	0.00467271	0.146082	0.031987	0.974482	0.995837	150.163	151.114
8430431K14Rik	3.12481	-0.248382	0.87612	-0.283502	0.776792	NA	2.08657	1.78021
8430436N08Rik	0.850548	1.38166	2.48942	0.555014	0.578885	NA	0.570539	1.38243
8430437L04Rik	0	NA	NA	NA	NA	NA	0	0
9030025P20Rik	1001.48	0.0364015	0.104967	0.346789	0.72875	0.944548	904.841	927.005
9030204H09Rik	0.503414	-1.44155	2.12764	-0.677534	0.498067	NA	1.02098	0.30183
9030404E10Rik	1.02805	0.332314	1.716	0.193657	0.846445	NA	0.204198	0.240484
9030612E09Rik	50.3151	0.0890468	0.196925	0.452186	0.651135	0.922986	61.6666	66.1105
9030617O03Rik	250.283	0.254369	0.131712	1.93125	0.0534527	0.375629	174.923	209.74
9030619P08Rik	0.821516	0.332315	2.08794	0.159159	0.873543	NA	0.204198	0.345606
9030624G23Rik	29.6154	-0.000357961	0.375848	-0.00095241	0.99924	1	17.6684	16.8999
9030624J02Rik	1821.89	0.0718617	0.0484098	1.48445	0.137691	0.561858	1681.68	1771.1
9030625G05Rik	0.136525	0	5.20139	0	1	NA	0	0
9130008F23Rik	6.0893	0.00421757	1.03894	0.00405949	0.996761	NA	1.14667	1.13278
9130011E15Rik	654.325	0.0466187	0.0620404	0.751425	0.452397	0.853039	635.707	657.196
9130015A21Rik	0.168471	0.332274	5.20139	0.0638818	0.949064	NA	0.28527	0.240484
9130015L21Rik	0	NA	NA	NA	NA	NA	0	0
9130019O22Rik	167.609	-0.0037633	0.121968	-0.0308547	0.975385	0.996153	140.204	141.77
9130019P16Rik	554.613	0.231731	0.150713	1.53757	0.124155	0.536873	212.147	249.411
9130023H24Rik	125.26	-0.10294	0.166332	-0.618884	0.535992	0.885245	71.7847	66.3583
9130024F11Rik	457.384	-0.180277	0.148352	-1.2152	0.224289	0.684417	1080.87	952.891
9130204L05Rik	0	NA	NA	NA	NA	NA	0	0
9130209A04Rik	0.0293292	0	5.20139	0	1	NA	0	0
9130221F21Rik	0.660784	1.05366	2.46961	0.426651	0.669633	NA	0	0.30183
9130221H12Rik	112.928	0.0490696	0.157061	0.312424	0.754718	0.952122	89.6986	91.9418
9130227L01Rik	6.49452	-0.645488	0.557285	-1.15827	0.246752	NA	17.002	10.7377
9130230L23Rik	0.534976	-0.389021	2.24286	-0.173449	0.862299	NA	0.204198	0
9130401M01Rik	858.02	-0.0413644	0.0669602	-0.617746	0.536743	0.885553	938.971	913.991
9130409I23Rik	1.18101	-0.955112	1.5076	-0.633531	0.526387	NA	1.20916	0.699954
9230009I02Rik	8.16346	-0.388871	1.4666	-0.265151	0.790893	NA	0.570539	0.30183
9230102K24Rik	2.49412	-0.43341	0.84506	-0.512875	0.608039	NA	4.59197	3.43826
9230102O04Rik	0.990865	1.05366	2.2734	0.463474	0.643025	NA	0	0.349977
9230104L09Rik	0.701958	-0.375006	1.7167	-0.218446	0.827082	NA	0.469022	0.30183
9230105E05Rik	0	NA	NA	NA	NA	NA	0	0
9230110C19Rik	273.38	-0.0375639	0.104352	-0.359974	0.718867	0.942321	274.556	268.208
9230110F15Rik	0	NA	NA	NA	NA	NA	0	0
9230112D13Rik	0.169962	0	5.20139	0	1	NA	0	0
9230112J17Rik	6.10365	0.58274	0.593194	0.982376	0.325915	NA	4.88354	7.63763
9230114K14Rik	55.0895	0.115154	0.220795	0.521543	0.601989	0.909778	54.4548	59.5025
9230116L04Rik	2.18246	0.448371	0.993527	0.451292	0.651779	NA	1.59151	1.9112
9230116N13Rik	11.8313	0.161839	0.563097	0.287408	0.7738	NA	6.06223	6.89817
9330020H09Rik	63.7388	-0.0619989	0.183535	-0.337804	0.735511	0.947142	57.065	54.6274
9330102E08Rik	751.533	0.0897425	0.0787388	1.13975	0.254391	0.716144	1120.43	1191.15
9330111N05Rik	1.17738	-0.285477	1.53938	-0.185449	0.852877	NA	0.754292	0.542315
9330117O12Rik	37.572	-0.439386	0.25945	-1.69353	0.0903546	0.474937	58.0141	42.6646
9330133O14Rik	138.49	-0.127737	0.15328	-0.833357	0.404643	0.826626	154.438	141.341
9330151L19Rik	365.052	0.0476412	0.0879849	0.541471	0.588183	0.904415	417.896	432.556
9330158H04Rik	10.6236	0.0597712	0.577145	0.103564	0.917516	NA	20.9159	21.6507
9330159F19Rik	2233.24	-0.0387758	0.132628	-0.292364	0.770008	0.954603	2912.5	2835.05
9330159M07Rik	62.3495	0.0332892	0.223323	0.149063	0.881504	0.978109	62.8855	64.4655
9330162012Rik	56.3812	0.00707164	0.208491	0.0339183	0.972942	0.995408	59.252	59.6046
9330162B11Rik	0.428507	0	2.44933	0	1	NA	0	0
9330175E14Rik	17.3428	1.69151	0.801128	2.11141	0.0347375	0.302721	1.22774	3.73519
9330175M20Rik	5.58044	1.47614	0.584899	2.52375	0.011611	NA	4.80246	13.5561
9330178D15Rik	0.871342	1.47089	1.73032	0.850071	0.395286	NA	0.634899	1.78851
9330179D12Rik	49.6539	0.0224982	0.183321	0.122725	0.902325	0.983055	75.2211	77.3359
9330182L06Rik	745.666	-0.0779845	0.0740561	-1.05305	0.29232	0.749434	1476.42	1400.36
9330182O14Rik	0.193078	-0.388993	5.20139	-0.0747863	0.940385	NA	0.226503	0
9330188P03Rik	30.4531	-0.12047	0.22415	-0.537453	0.590954	0.904832	54.6493	50.3188
9430007A20Rik	0.264335	1.05363	4.99321	0.211013	0.832877	NA	0	0.240484
9430008C03Rik	244.314	0.0268221	0.126245	0.21246	0.831748	0.967811	206.975	210.859
9430014N10Rik	0.0532845	0	5.20139	0	1	NA	0	0
9430015G10Rik	707.765	-0.0611601	0.0905772	-0.675226	0.499532	0.871456	787.061	754.973
9430016H08Rik	388.11	0.0177036	0.078867	0.224474	0.822388	0.966434	407.25	411.471
9430018G01Rik	1.78412	-0.833104	0.911563	-0.913929	0.360754	NA	5.06169	2.87392
9430019J16Rik	0	NA	NA	NA	NA	NA	0	0
9430020K01Rik	3962.23	-0.202185	0.0962441	-2.10076	0.0356625	0.307584	5811.41	5049.75
9430021M05Rik	90.1452	0.176908	0.151998	1.16389	0.244469	0.70869	177.873	202.032
9430037G07Rik	59.0541	-0.323575	0.214201	-1.51062	0.130886	0.550388	69.6037	54.5724
9430038I01Rik	87.4502	0.117865	0.208057	0.566501	0.571053	0.897592	52.7482	58.1556
9430041J12Rik	81.3651	-0.0261281	0.200894	-0.130059	0.896519	0.982432	126.654	123.968
9430060I03Rik	8.80234	0.61661	0.540554	1.1407	0.253995	NA	6.61449	10.52
9430069I07Rik	0.828925	1.70776	1.70376	1.00234	0.316178	NA	0	0.480969
9430076C15Rik	2.49625	-0.641479	1.45223	-0.441719	0.658692	NA	0.978935	0.699954
9430083A17Rik	71.9767	0.0547278	0.196317	0.278772	0.78042	0.958753	111.96	116.202
9430091E24Rik	122.222	-0.0424971	0.185151	-0.229527	0.818459	0.966434	112.138	108.073
9530002B09Rik	0	NA	NA	NA	NA	NA	0	0
9530003J23Rik	0.193608	0.332276	5.20139	0.063882	0.949064	NA	0.264824	0.240484
9530026F06Rik	0.137015	-0.389004	5.20139	-0.0747885	0.940383	NA	0.28527	0
9530026P05Rik	29.3465	-0.269671	0.437897	-0.615832	0.538005	0.886968	9.8719	8.36312
9530027J09Rik	9.36857	-0.300414	0.471775	-0.636775	0.524272	NA	8.44667	7.01607
9530036O11Rik	9.42191	-0.00409328	0.501319	-0.00816503	0.993485	NA	7.56621	7.49311
9530051G07Rik	21.8512	-0.0273037	0.327883	-0.0832726	0.933635	0.989557	23.4582	22.889
9530052E02Rik	8.82774	0.0058143	0.414057	0.0140423	0.988796	NA	10.5704	10.3181
9530053A07Rik	10.1154	1.4009	0.574108	2.44014	0.0146816	NA	4.36204	12.0601
9530059O14Rik	4.76773	0.883365	0.700586	1.26089	0.207347	NA	4.85681	8.98817
9530068E07Rik	3721.47	-0.0394665	0.0439534	-0.897916	0.36923	0.80459	2211.12	2150.34
9530077C05Rik	193.334	-0.0260532	0.128254	-0.203137	0.839028	0.9699	237.973	232.872
9530080O11Rik	57.268	-0.33358	0.219531	-1.51951	0.128634	0.54595	89.3238	70.1819
9530082P21Rik	2535.52	0.129616	0.0499264	2.59614	0.00942785	0.145404	3442.06	3762.28
9530091C08Rik	17.5898	0.23992	0.419596	0.571788	0.567465	0.896905	9.32665	10.8555
9630001P10Rik	26.9898	-0.23296	0.431878	-0.539411	0.589603	0.90459	36.5631	31.0204
9630013A20Rik	52.6837	-0.012368	0.205461	-0.0601964	0.951999	0.991983	81.7172	80.8416
9630028B13Rik	14.561	0.434099	0.464142	0.935272	0.349648	NA	7.39009	10.1655
9630028H03Rik	0.601127	1.81057	2.354	0.769147	0.441806	NA	0	0.603661
9630033F20Rik	1005.85	-0.0151913	0.0700766	-0.216782	0.828378	0.967247	1118.94	1105.91
9830107B12Rik	3.62034	0	1.58961	0	1	NA	0	0
9830132P13Rik	0.483977	0	2.78963	0	1	NA	0	0
9830147E19Rik	136.245	-0.0901991	0.153691	-0.586886	0.55728	0.89234	84.4039	78.7323
9830166K06Rik	52.1432	0.0998005	0.20375	0.489818	0.624263	0.915292	45.458	49.0212
9930012K11Rik	65.3162	-0.0570871	0.241253	-0.236627	0.812946	0.965716	38.0327	37.2293
9930014A18Rik	66.5028	-0.119577	0.194992	-0.61324	0.539717	0.88739	48.4978	44.738
9930021J03Rik	1679.75	-0.0202667	0.0648534	-0.312499	0.754661	0.952122	1909.01	1880.69
9930104L06Rik	510.765	0.0948094	0.071863	1.31931	0.187067	0.636255	514.073	548.949
9930111H07Rik	0	NA	NA	NA	NA	NA	0	0
9930111J21Rik1	84.1116	0.758889	0.336499	2.25525	0.0241177	0.248545	12.693	22.0934
9930111J21Rik2	173.09	0.610426	0.308685	1.9775	0.0479848	0.358897	22.7727	34.4536
a	1.57038	0	1.61866	0	1	NA	0	0
A130010J15Rik	131.638	0.183156	0.160367	1.1421	0.253412	0.714871	107.442	121.969
A130077B15Rik	17.4461	-0.0128657	0.554202	-0.0232148	0.981479	0.997546	5.89893	5.78273
A1bg	2.86652	0	1.53291	0	1	NA	0	0
A1cf	0.0847864	0	5.20139	0	1	NA	0	0
A230001M10Rik	17.3232	-0.240197	0.311823	-0.7703	0.441122	0.846464	32.6202	27.4116
A230009B12Rik	11.5194	-0.451689	0.457907	-0.986422	0.323926	NA	22.3774	16.2621
A230020J21Rik	3.25822	1.40026	0.963945	1.45263	0.146326	NA	1.4115	3.67822
A230028O05Rik	7.34033	0.637907	0.684913	0.931369	0.351663	NA	2.83715	4.3476
A230046K03Rik	1595.52	-0.00986274	0.0892549	-0.110501	0.912012	0.985723	1340.17	1332.92
A230050P20Rik	1293.26	0.0603246	0.064837	0.930404	0.352162	0.791556	1561.4	1627.85
A230056J06Rik	23.4133	-0.135767	0.295653	-0.459212	0.646082	0.92109	30.549	28.2617
A230056P14Rik	262.481	-0.0791071	0.120558	-0.656175	0.511711	0.875669	378.262	358.15
A230057D06Rik	124.301	-0.215026	0.191699	-1.12168	0.261997	0.722245	214.175	184.433
A230065H16Rik	14.9129	-0.0362114	0.77723	-0.0465904	0.96284	NA	16.5695	16.3424
A230070E04Rik	208.682	-0.0457693	0.271865	-0.168353	0.866306	0.974813	297.352	288.004
A230072C01Rik	234.884	-0.0745923	0.0976882	-0.763576	0.44512	0.848647	265.145	252.012
A230072E10Rik	9.97906	-0.600037	0.425166	-1.4113	0.158156	NA	12.8452	8.68712
A230073K19Rik	155.523	-0.271276	0.201183	-1.3484	0.177529	0.626212	273.903	226.854
A230077H06Rik	87.8506	0.132075	0.218637	0.604084	0.545788	0.888673	78.2054	86.3954
A230103J11Rik	54.5746	0.0764504	0.17235	0.443577	0.657349	0.925672	87.2925	92.0182
A230108P19Rik	1.84857	-0.00281092	1.19131	-0.00235952	0.998117	NA	1.24562	1.23353
A2m	467.843	0.309831	0.312523	0.991388	0.321496	0.770697	35.3841	44.92
A330009N23Rik	183.026	0.0383377	0.126555	0.302932	0.761942	0.953415	269.235	275.289
A330021E22Rik	294.962	-0.140861	0.127794	-1.10225	0.270355	0.72974	355.353	321.698
A330023F24Rik	1262.35	-0.073848	0.137413	-0.537417	0.59098	0.904832	1623.03	1540.76
A330032B11Rik	4.09096	0.305523	0.639199	0.477978	0.632666	NA	5.08844	6.20216
A330033J07Rik	17.1472	0.80045	0.399116	2.00556	0.0449036	0.347637	18.4475	32.4028
A330035P11Rik	21.4408	-0.13291	0.324632	-0.409416	0.682234	0.932889	17.2555	15.7076
A330040F15Rik	76.156	0.135889	0.220202	0.617108	0.537164	0.886046	108.507	119.089
A330041J22Rik	22.3765	-0.191226	0.303286	-0.630513	0.528359	0.881869	25.2009	21.4409
A330048O09Rik	27.6718	-0.00176048	0.356341	-0.00494044	0.996058	0.999755	18.0214	18.0512
A330049N07Rik	16.9996	-0.908452	0.337853	-2.6889	0.00716889	0.123294	32.9702	17.0886
A330050F15Rik	342.348	0.0312149	0.417482	0.0747694	0.940398	0.99076	312.115	318.87
A330069E16Rik	22.586	-0.560517	0.32924	-1.70246	0.0886695	0.471611	26.5405	18.3148
A330070K13Rik	16.1048	0.40211	0.419577	0.95837	0.337876	0.783152	12.728	16.7441
A330074K22Rik	123.42	0.191552	0.136015	1.40832	0.159036	0.597944	118.311	136.237
A330076C08Rik	2.91235	-0.305638	0.998931	-0.305966	0.759631	NA	1.8422	1.58788
A330076H08Rik	70.4121	-0.403519	0.229837	-1.75568	0.0791437	0.450098	113.916	85.6773
A330093E20Rik	25.9565	-0.223566	0.300781	-0.743287	0.457308	0.855237	28.6996	24.7667
A330102I10Rik	95.1869	-0.0893569	0.189852	-0.470666	0.637879	0.91824	140.589	131.293
A3galt2	23.0683	-0.830573	0.47734	-1.74	0.0818584	0.455155	11.8123	6.41207
A430005L14Rik	493.673	-0.0770108	0.0931702	-0.82656	0.408486	0.830797	466.889	440.902
A430033K04Rik	251.354	0.283113	0.107742	2.62769	0.00859669	0.138439	245.046	299.742
A430035B10Rik	66.9444	-0.0053544	0.155026	-0.0345386	0.972448	0.995368	80.1433	80.128
A430078G23Rik	11.8032	1.04889	1.46028	0.718276	0.472587	NA	0.204198	0.651807
A430088P11Rik	1.37544	0.406182	1.4259	0.284859	0.775752	NA	1.2073	1.64922
A430089I19Rik	0.0862329	0	5.20139	0	1	NA	0	0
A430090L17Rik	6.7362	0.756482	0.748203	1.01107	0.311985	NA	2.28704	3.88453
A430093F15Rik	17.3145	0.512967	0.459759	1.11573	0.264538	0.724277	6.41884	8.86592
A430105I19Rik	502.86	0.172114	0.111093	1.54927	0.121316	0.53337	221.128	251.311
A430107P09Rik	8.64614	0.00086809	0.453982	0.00191217	0.998474	NA	9.96597	10.148
A4galt	308.82	0.428132	0.18838	2.2727	0.023044	0.242255	44.1846	60.5167
A4gnt	3.43209	0.795759	0.574129	1.38603	0.165739	NA	6.12986	10.524
A530006G24Rik	0.494505	1.72835	2.57537	0.671106	0.502153	NA	0	0.590461
A530013C23Rik	9.77841	0.306251	0.758081	0.403983	0.686226	NA	2.32793	2.71628
A530016L24Rik	58.3976	0.366366	0.207889	1.76232	0.0780159	0.446598	34.6867	44.6424
A530032D15Rik	88.1595	-0.112992	0.185512	-0.609084	0.542469	0.887885	60.7169	55.7949
A530046M15Rik	13.7564	-0.155213	0.491445	-0.31583	0.752131	NA	10.3011	9.4791
A530050N04Rik	5.60215	-1.23563	0.772092	-1.60036	0.109519	NA	12.4807	5.27929
A530053G22Rik	0	NA	NA	NA	NA	NA	0	0
A530054K11Rik	969.689	-0.0476485	0.0942476	-0.505568	0.61316	0.910772	870.169	842.466
A530058N18Rik	28.2241	-0.248695	0.29097	-0.85471	0.392712	0.820174	23.4209	19.8013
A530064D06Rik	10.0068	0	1.47308	0	1	NA	0	0
A530065N20Rik	1.43487	3.0668	1.35665	2.26057	0.0237858	NA	0.264824	2.51957
A530072M11Rik	27.8211	-0.0153207	0.317302	-0.0482843	0.96149	0.993083	18.7981	18.4498
A530088E08Rik	2.29737	-2.22552	1.27786	-1.7416	0.081579	NA	1.8366	0.345606
A530099J19Rik	17.0798	-0.382882	1.44573	-0.264836	0.791136	0.959667	0.453005	0.349977
A630001G21Rik	162.304	0.449685	0.359984	1.24918	0.211599	0.669889	10.3395	13.9792
A630007B06Rik	800.628	-0.0498921	0.0981586	-0.508281	0.611257	0.9105	897.912	866.093
A630010A05Rik	0.597579	2.10152	2.54388	0.826109	0.408742	NA	0.28527	1.2773
A630012P03Rik	2.06446	0.332316	1.98338	0.167551	0.866937	NA	0.28527	0.349977
A630019I02Rik	1.72475	-0.368616	1.04398	-0.353088	0.724022	NA	3.86255	2.96559
A630020A06	3.17405	0.904	0.925649	0.976612	0.328761	NA	1.56921	2.83897
A630023A22Rik	0.948065	1.05366	1.86786	0.564099	0.572687	NA	0	0.349977
A630023P12Rik	12.2582	-0.00731277	0.372625	-0.019625	0.984343	NA	15.2858	15.4629
A630033H20Rik	72.9785	-0.0436452	0.496591	-0.0878897	0.929964	0.989116	5.8959	5.38879
A630066F11Rik	14.3351	-0.289905	0.427209	-0.678601	0.497391	NA	12.5034	10.354
A630072M18Rik	242.509	-0.0227147	0.127597	-0.178018	0.858709	0.973621	197.472	193.752
A630073D07Rik	0.0344921	0	5.20139	0	1	NA	0	0
A630075F10Rik	26.3948	-0.120329	0.319003	-0.377204	0.706022	0.938416	53.6571	48.9118
A630076J17Rik	1.34039	0.0527968	1.32967	0.0397067	0.968327	NA	1.25005	1.34302
A630077J23Rik	4.72814	-0.150434	0.854906	-0.175965	0.860321	NA	2.30679	2.18279
A630089N07Rik	20.0395	-1.09697	0.36853	-2.9766	0.0029146	0.0712603	28.2486	12.7847
A630095E13Rik	0	NA	NA	NA	NA	NA	0	0
A630095N17Rik	3.59999	-0.0417554	0.632135	-0.0660545	0.947334	NA	5.69059	5.70852
A730006G06Rik	1.77069	-0.639828	1.4693	-0.435464	0.663226	NA	0.978935	0.695584
A730008H23Rik	0	NA	NA	NA	NA	NA	0	0
A730017C20Rik	589.675	0.107544	0.157171	0.684244	0.493821	0.870095	808.743	871.431
A730017L22Rik	233.313	-0.260768	0.115358	-2.26051	0.0237893	0.246457	211.241	176.263
A730018C14Rik	0.14665	1.0536	5.20139	0.202562	0.839478	NA	0	0.240484
A730020E08Rik	54.787	-0.2078	0.184733	-1.12487	0.260646	0.720647	75.9855	66.1548
A730020M07Rik	32.5041	0.682098	0.325451	2.09586	0.0360949	0.309382	14.999	23.1162
A730036I17Rik	13.1698	-0.0072345	0.492164	-0.0146994	0.988272	NA	13.0568	12.8115
A730043L09Rik	2.87756	1.34135	1.13597	1.1808	0.237684	NA	2.71517	6.93356
A730046J19Rik	11.019	0.250051	0.80169	0.311905	0.755113	NA	7.76394	9.58005
A730056A06Rik	50.3407	-0.444381	0.196881	-2.2571	0.0240015	0.247674	111.03	81.6649
A730082K24Rik	0.246893	0.332285	5.00143	0.066438	0.947029	NA	0.264824	0.240484
A730085K08Rik	2.60534	-1.12215	0.79917	-1.40415	0.160275	NA	5.3168	2.47143
A730090H04Rik	8.86882	-0.821072	0.547537	-1.49957	0.133725	NA	8.60391	4.5311
A730090N16Rik	5.49302	0.792579	0.792471	1.00014	0.317245	NA	2.99259	5.23978
A730098P11Rik	4902.84	-0.0425508	0.0417248	-1.0198	0.307825	0.761727	5220.73	5068.98
A830009L08Rik	89.5118	0.0882309	0.215647	0.409144	0.682434	0.932889	249.286	264.325
A830010M20Rik	3976.05	0.022867	0.0838682	0.272654	0.785119	0.959308	7611.12	7730.9
A830018L16Rik	1734.63	-0.0345313	0.217427	-0.158818	0.873812	0.976543	2663.63	2600.78
A830019L24Rik	7.83528	-0.232714	0.444133	-0.523975	0.600296	NA	18.1821	15.2866
A830052D11Rik	10.2182	1.00306	0.384408	2.60937	0.0090709	NA	9.46205	19.0014
A830080D01Rik	267.596	-0.179701	0.111151	-1.61673	0.105937	0.505183	260.261	229.883
A830082K12Rik	191.685	-0.0157512	0.0982764	-0.160274	0.872665	0.976232	309.171	305.549
A830082N09Rik	444.016	-0.0648986	0.11891	-0.545777	0.585219	0.903619	625.162	598.426
A930001A20Rik	2.28096	0.359652	0.868525	0.414095	0.678804	NA	3.3668	4.36987
A930001C03Rik	7.83414	-0.176545	0.604769	-0.291921	0.770347	NA	5.37183	4.69354
A930003A15Rik	104.385	0.379274	0.397471	0.954219	0.339973	0.784533	7.96391	10.5418
A930003O13Rik	5.60628	0.232906	0.495934	0.469631	0.638619	NA	7.42125	8.74804
A930004D18Rik	105.195	0.259705	0.185297	1.40156	0.161047	0.601292	56.2809	66.9229
A930005H10Rik	245.674	0.0469315	0.0950082	0.493973	0.621325	0.914614	277.749	286.567
A930006I01Rik	1.11373	-0.389026	1.69324	-0.229752	0.818284	NA	0.204198	0
A930006K02Rik	18.8678	-0.209073	0.335167	-0.623788	0.532766	0.884175	18.1682	15.9174
A930007I19Rik	28.7571	-0.114732	0.289111	-0.396845	0.691481	0.935306	23.2431	21.8011
A930009A15Rik	7.64236	-0.0275603	0.497575	-0.0553892	0.955828	NA	8.90223	8.73485
A930011G23Rik	22.1655	-0.069358	0.243261	-0.285117	0.775554	0.956678	53.5744	51.3962
A930011O12Rik	4304.77	-0.196324	0.113487	-1.72992	0.0836442	0.459187	5786.22	5047.88
A930012L18Rik	23.1031	0.163794	0.297351	0.550846	0.581739	0.902344	36.0558	40.2271
A930013F10Rik	300.224	-0.00461997	0.106906	-0.0432153	0.96553	0.994245	319.072	317.645
A930015D03Rik	249.13	-0.136067	0.123637	-1.10054	0.271097	0.730395	278.05	251.696
A930016O22Rik	15.789	0.48728	0.294523	1.65447	0.0980314	0.488942	23.4729	32.9198
A930017M01Rik	229.514	0.10823	0.163005	0.663969	0.50671	0.873819	348.032	375.513
A930018P22Rik	2.46095	0.326429	1.26494	0.258059	0.796362	NA	1.41335	1.77584
A930019D19Rik	3.51427	-0.0810432	0.831819	-0.0974288	0.922386	NA	3.12171	2.86484
A930024E05Rik	108.556	0.0325749	0.164016	0.198609	0.842569	0.97079	60.035	62.0161
A930041C12Rik	4.70872	-0.260473	0.83524	-0.311855	0.755151	NA	2.98628	2.52394
AA387883	29.148	0.0927312	0.262765	0.352906	0.724159	0.94335	47.2217	50.7673
AA388235	0.292822	-1.60004	4.86527	-0.32887	0.742254	NA	0.679508	0
AA413626	6.36318	-0.227767	0.598755	-0.3804	0.703648	NA	6.72315	5.75196
AA414768	235.999	0.0275785	0.109123	0.252728	0.800478	0.961509	231.941	236.763
AA415398	166.425	-0.0451444	0.11454	-0.394137	0.69348	0.935354	160.91	157.052
AA465934	455.571	0.0633591	0.173186	0.365844	0.714482	0.941102	540.632	564.986
AA467197	6.02282	-1.12564	0.926632	-1.21477	0.224454	NA	2.67499	1.28167
AA474331	97.1578	0.0021531	0.155463	0.0138496	0.98895	0.998855	110.328	111.392
AA536875	0.505805	-0.837717	2.39608	-0.34962	0.726624	NA	1.02098	0.480969
AA543186	20.7222	0.703364	0.37237	1.88889	0.0589072	0.394559	10.0259	16.5825
AA543401	0.287909	0.429562	3.30857	0.129833	0.896698	NA	0.511772	0.695584
AA545190	0.0847972	1.05359	5.20139	0.20256	0.839479	NA	0	0.30183
AA619741	0.77735	0	2.31714	0	1	NA	0	0
AA792892	0.478272	-0.389016	2.76304	-0.140793	0.888034	NA	0.28527	0
AA986860	81.5782	0.0426514	0.190001	0.22448	0.822383	0.966434	69.5818	72.175
AA987161	382.279	-0.0601633	0.103649	-0.580451	0.561611	0.894349	410.675	395.031
Aaas	403.322	0.118475	0.114398	1.03564	0.30037	0.755623	318.796	347.631
Aacs	1438.45	0.10544	0.082466	1.27858	0.201044	0.654092	1675.44	1802.17
Aadac	0.131104	0	5.20139	0	1	NA	0	0
Aadacl2	0.259548	0	3.45314	0	1	NA	0	0
Aadacl3	0.285408	-0.388988	4.84361	-0.0803096	0.935991	NA	0.204198	0
Aadat	3.98175	0.208669	0.805063	0.259197	0.795484	NA	5.50173	6.60071
Aaed1	327.775	-0.0260612	0.0978654	-0.266297	0.790011	0.959361	234.126	230.353
Aagab	2346.03	0.0715875	0.051822	1.38141	0.167153	0.609598	2032.48	2133.94
Aak1	12758.2	-0.0264893	0.0546801	-0.484442	0.628072	0.916441	16276.8	15978
Aamdc	510.736	0.00490443	0.0876281	0.0559687	0.955367	0.992168	478.917	481.905
Aamp	4342.28	0.028896	0.0438876	0.658408	0.510276	0.874911	4388.68	4477.64
Aanat	34.5641	-0.407696	0.415367	-0.98153	0.326331	0.773678	18.2325	13.7649
Aar2	1180.28	0.0692741	0.0620955	1.11561	0.264591	0.724277	1149.83	1207.57
Aard	69.5851	-0.194235	0.18667	-1.04053	0.298096	0.753648	55.107	47.9354
Aars	5702.52	0.0374195	0.0447643	0.835923	0.403198	0.825799	6977.54	7158.54
Aars2	857.333	0.0636864	0.0645729	0.986272	0.324	0.771862	1083.96	1133.05
Aarsd1	1241.98	-0.00290298	0.0645246	-0.0449902	0.964115	0.993672	1454.54	1451.44
Aasdh	344.712	0.0203189	0.0971977	0.209047	0.834411	0.96853	314.46	319.593
Aasdhppt	734.402	-0.148279	0.0603112	-2.45856	0.0139496	0.181879	828.048	749.342
Aass	289.067	0.0709083	0.147448	0.480905	0.630584	0.916742	231.687	243.022
Aatf	439.682	-0.0678805	0.0913977	-0.742693	0.457668	0.855372	426.76	407.741
Aatk	7390.12	0.0780176	0.153141	0.509448	0.610438	0.910336	10346.5	10921.3
AB041803	9.66484	-0.251164	0.466747	-0.538115	0.590498	NA	10.933	9.05414
AB124611	299.128	0.342291	0.380031	0.900693	0.367752	0.803592	8.71749	11.4476
Abat	6537.14	0.0702882	0.125256	0.561157	0.574691	0.899334	8983.7	9432.57
Abca1	3205.2	0.123344	0.101602	1.214	0.224749	0.684926	984.035	1072.37
Abca12	7.61655	-0.11571	0.395592	-0.292499	0.769905	NA	16.8159	15.5591
Abca13	19.3353	1.11006	0.771382	1.43906	0.150134	0.583027	2.29334	5.33705
Abca14	2.40978	-0.422774	1.15624	-0.365647	0.714628	NA	1.18499	0.830946
Abca15	1.05247	0.998214	1.35353	0.737488	0.460826	NA	0.754292	1.41704
Abca16	1.22014	-1.60424	1.98666	-0.80751	0.419373	NA	0.657203	0
Abca17	11.2345	-0.522307	0.411956	-1.26787	0.204845	NA	16.4043	11.6664
Abca2	8570.71	0.0891675	0.0864999	1.03084	0.302616	0.756837	11073.1	11778.8
Abca3	3800.65	0.0508783	0.0593099	0.857838	0.390982	0.819312	4066.51	4211.63
Abca4	1166.86	0.96958	0.163035	5.94706	2.73004e-09	4.11737e-07	54.4158	107.467
Abca5	1599.1	-0.112042	0.0753235	-1.48748	0.136889	0.560602	2194.27	2028.27
Abca6	75.8739	-0.123288	0.244772	-0.503685	0.614482	0.911288	67.8468	62.6116
Abca7	1184.46	-0.134661	0.0679022	-1.98316	0.0473501	0.357404	1264.68	1150.26
Abca8a	563.52	-0.0407597	0.218366	-0.186658	0.851929	0.972895	66.5324	65.4855
Abca8b	621.859	0.279384	0.0862356	3.23977	0.00119626	0.0393363	599.123	728.013
Abca9	1571.79	0.209489	0.161335	1.29847	0.194127	0.644556	237.24	274.301
Abcb10	1008.45	0.0634551	0.0723781	0.876717	0.38064	0.812623	893.905	936.853
Abcb11	2.71736	0.501916	1.01243	0.495753	0.620069	NA	1.74137	2.42765
Abcb1a	1598.53	0.182943	0.0832062	2.19867	0.0279011	0.270643	912.51	1035.9
Abcb1b	269.337	0.0326739	0.109586	0.298157	0.765583	0.954014	164.289	168.284
Abcb4	183.45	0.190886	0.149452	1.27723	0.201519	0.655303	151.092	172.998
Abcb5	1.26084	0.0148788	1.53075	0.00971994	0.992245	NA	0.816792	0.887921
Abcb6	638.355	0.0671058	0.0757592	0.885777	0.375738	0.809362	717.123	752.998
Abcb7	1183.77	-0.142108	0.0712068	-1.99571	0.045965	0.352204	1416.77	1283.21
Abcb8	1388.89	0.0782816	0.0693073	1.12949	0.258693	0.72048	1472.42	1556.02
Abcb9	1266.92	-0.057465	0.0719594	-0.798576	0.424536	0.839397	2122.12	2037.65
Abcc1	994.903	-0.0516605	0.070713	-0.730567	0.465044	0.858789	587.381	566.053
Abcc10	469.167	0.154389	0.0766969	2.01297	0.0441173	0.343585	425.844	476.27
Abcc12	23.3887	-0.360749	0.385116	-0.936728	0.348898	0.79082	14.0116	11.2239
Abcc2	3.42226	-0.0483318	0.845811	-0.0571426	0.954432	NA	3.4516	3.19254
Abcc3	222.908	-0.230906	0.166131	-1.3899	0.164558	0.605772	98.0351	83.1418
Abcc4	1097.39	0.16547	0.0839422	1.97124	0.0486969	0.360118	450.575	505.353
Abcc5	4842.26	-0.108123	0.0705573	-1.53241	0.125422	0.53969	6492.96	6022.76
Abcc6	50.3807	-0.469455	0.209516	-2.24067	0.0250477	0.25363	56.2218	40.2231
Abcc8	1363.81	0.130178	0.236735	0.549892	0.582394	0.902344	1894.14	2072.7
Abcc9	509.579	0.362685	0.196079	1.84969	0.0643589	0.412365	153.057	196.399
Abcd1	792.331	0.143396	0.118632	1.20875	0.226759	0.688242	385.278	425.821
Abcd2	1011.62	-0.086607	0.104247	-0.830783	0.406096	0.827961	1859.5	1749.6
Abcd3	2555.15	-0.00876091	0.0512529	-0.170935	0.864275	0.974813	2030.74	2020.89
Abcd4	438.679	0.15825	0.087213	1.81452	0.069597	0.424237	334.838	375.304
Abce1	2777.7	-0.152714	0.0523926	-2.91479	0.00355926	0.0809087	3008.1	2705.12
Abcf1	3599.77	-0.0376008	0.0366003	-1.02734	0.304262	0.758359	3568.67	3472.63
Abcf2	2733.84	-0.0352045	0.0450862	-0.780827	0.434904	0.843307	3527.39	3438.11
Abcf3	2116.3	0.0123791	0.0492003	0.251607	0.801345	0.961675	2416.15	2437.67
Abcg1	2625.01	0.257903	0.0739764	3.48628	0.00048978	0.0200484	2679.25	3204.68
Abcg2	1030.19	0.0728228	0.0894771	0.813871	0.415719	0.834437	429.113	451.587
Abcg3	27.1461	2.11422	1.1565	1.82812	0.0675313	0.418719	0.489468	1.86743
Abcg4	1825.37	0.107376	0.105063	1.02202	0.306773	0.760798	2204.85	2375.82
Abcg5	2.45302	-1.24416	1.09287	-1.13843	0.254939	NA	2.02409	0.830946
Abcg8	2.37455	0.65867	1.09993	0.598829	0.549287	NA	1.10206	1.88096
Abhd1	38.5068	-0.197106	0.277367	-0.710634	0.477311	0.863387	43.3938	38.1255
Abhd10	510.478	-0.0528973	0.0806429	-0.655944	0.51186	0.875669	597.107	575.641
Abhd11	653.092	0.164913	0.0611966	2.6948	0.00704306	0.122067	672.002	754.75
Abhd11os	61.4538	0.0240381	0.213397	0.112645	0.910312	0.985465	41.3079	41.3205
Abhd12	7839.9	0.0402449	0.056567	0.711456	0.476802	0.863387	9734.51	10009
Abhd12b	1.31709	0.170889	1.36688	0.125021	0.900507	NA	2.59275	2.83844
Abhd13	1366.98	-0.00641148	0.054328	-0.118014	0.906056	0.983821	1463.75	1459.29
Abhd14a	497.237	0.0682055	0.0749575	0.909921	0.362864	0.801397	460.065	482.05
Abhd14b	791.186	-0.00162775	0.0956474	-0.0170182	0.986422	0.998285	408.04	408.278
Abhd15	97.3962	0.709017	0.218348	3.24719	0.0011655	0.0386488	27.7145	45.4899
Abhd16a	2634.17	0.137088	0.051371	2.66859	0.00761706	0.127916	2662.57	2929.93
Abhd16b	0.995233	0.32914	1.46498	0.224672	0.822234	NA	0.835364	1.04556
Abhd17a	4137.78	-0.0119	0.0639742	-0.186012	0.852435	0.972937	5422.61	5375.56
Abhd17b	1159.67	-0.103552	0.0780441	-1.32683	0.184564	0.634518	1226.79	1141.31
Abhd17c	1141.16	0.0491193	0.0635837	0.772514	0.43981	0.846325	910.344	943.361
Abhd2	2890.3	0.103975	0.0828813	1.25451	0.209657	0.666898	1805.52	1938.32
Abhd3	1079.82	-0.12052	0.13155	-0.916154	0.359586	0.797752	1462.77	1345.62
Abhd4	1752.89	0.0271683	0.0591359	0.459422	0.645931	0.92109	1524.13	1552.61
Abhd5	685.764	-0.0707469	0.0872262	-0.811074	0.417323	0.835126	496.362	472.45
Abhd6	1628.1	-0.112168	0.0629477	-1.78192	0.074762	0.438207	2162.73	1997.95
Abhd8	6941.98	0.0519168	0.100046	0.518929	0.60381	0.9101	10305.2	10682.2
Abi1	4964.95	-0.00679876	0.0613355	-0.110845	0.911739	0.985692	4046.59	4026.86
Abi2	5603.9	-0.0553128	0.0832091	-0.664745	0.506214	0.873771	7638.21	7350.6
Abi3	240.51	0.210234	0.136987	1.5347	0.124857	0.537871	95.6048	110.655
Abi3bp	978.658	0.114079	0.16665	0.684541	0.493634	0.870095	203.337	221.116
Abl1	2728.77	0.00870617	0.0619106	0.140625	0.888166	0.979324	1926.27	1938.02
Abl2	2456.07	0.018129	0.0893308	0.202943	0.83918	0.9699	2429.31	2458.41
Ablim1	4180.19	-0.0232729	0.0539974	-0.431	0.666468	0.92871	5349.64	5259.48
Ablim2	2870.54	0.00491353	0.164864	0.0298035	0.976224	0.99662	4706.18	4722.37
Ablim3	899.934	0.22439	0.25885	0.866876	0.38601	0.816623	769.767	899.398
Abo	0.0567302	0	5.20139	0	1	NA	0	0
Abr	19489.2	0.0352301	0.0503196	0.700126	0.483849	0.86633	22551	23108.6
Abra	6.46793	-0.172712	0.506153	-0.341225	0.732934	NA	13.5262	11.8704
Abracl	553.144	-0.376536	0.122754	-3.0674	0.00215931	0.0585966	312.961	239.313
Abt1	504.229	-0.0432508	0.0810638	-0.53354	0.59366	0.90598	613.003	594.64
Abtb1	1039.69	0.164846	0.0952991	1.72978	0.0836695	0.459187	1263.88	1415.27
Abtb2	407.056	-0.0155332	0.137423	-0.113033	0.910005	0.985461	464.816	459.074
Acaa1a	1282.84	-0.0839833	0.064994	-1.29217	0.196298	0.647024	1075.24	1011.08
Acaa1b	312.231	0.0222083	0.153434	0.144742	0.884914	0.97925	256.09	260.166
Acaa2	962.945	0.249568	0.0986292	2.53037	0.0113944	0.162031	577.91	689.031
Acaca	2308.9	-0.000604262	0.062889	-0.0096084	0.992334	0.999499	2816.33	2815.57
Acacb	486.703	0.325809	0.116558	2.79526	0.00518577	0.102168	128.239	161.364
Acad10	226.876	-0.0166371	0.139102	-0.119604	0.904797	0.98342	135.243	134.061
Acad11	690.296	-0.017893	0.0671458	-0.26648	0.78987	0.959361	678.636	667.536
Acad12	147.931	-0.0281687	0.153292	-0.183759	0.854203	0.972959	87.0772	84.8531
Acad8	1015.73	0.0208221	0.0933189	0.223128	0.823436	0.966591	626.21	635.75
Acad9	1301.23	-0.0128848	0.0452913	-0.284486	0.776038	0.95678	1563.7	1547.61
Acadl	1247.01	0.137963	0.0802405	1.71937	0.0855462	0.462528	848.595	936.015
Acadm	1375.78	-0.0831102	0.0516969	-1.60764	0.107913	0.509795	1035.94	976.734
Acads	288.438	0.147119	0.124698	1.1798	0.238078	0.702119	136.462	151.211
Acadsb	2295.76	-0.0131883	0.0455666	-0.289428	0.772254	0.955272	1686.62	1672.21
Acadvl	1919.77	-0.0439956	0.0466733	-0.942629	0.34587	0.790237	1623.33	1575.41
Acan	393.897	-0.103349	0.193073	-0.535282	0.592455	0.90534	181.245	168.41
Acap1	111.75	-0.788783	0.553249	-1.42573	0.153947	0.589228	5.86246	3.67026
Acap2	3698.95	-0.0026971	0.0846027	-0.0318796	0.974568	0.995837	3280.82	3273.32
Acap3	5071.89	-0.0406947	0.0832741	-0.488683	0.625066	0.915393	7192.55	6990.44
Acat1	3314.71	-0.0859181	0.06193	-1.38734	0.165337	0.606133	3278.35	3089.14
Acat2	1103.07	-0.096838	0.0781432	-1.23924	0.215258	0.675651	1500.35	1404.63
Acat3	276.433	-0.0141959	0.0939028	-0.151177	0.879836	0.977943	357.755	355.205
Acbd3	1472.42	-0.089636	0.0641449	-1.3974	0.162294	0.602932	1257.78	1180.86
Acbd4	1095.68	0.173137	0.0574595	3.0132	0.00258508	0.0658229	900.586	1014.06
Acbd5	2405.9	-0.0763454	0.0586204	-1.30237	0.19279	0.642292	2755.91	2613.45
Acbd6	1366.1	-0.0717825	0.0590814	-1.21498	0.224375	0.684417	1662.24	1580.4
Acbd7	8.52641	-0.78652	0.573195	-1.37217	0.170011	NA	8.15768	4.73698
Accs	142.21	-0.046118	0.186896	-0.246757	0.805096	0.962787	84.7336	82.0229
Accsl	4.50003	0.665999	0.57556	1.15713	0.247218	NA	4.56251	7.25655
Acd	923.913	0.00740823	0.0709293	0.104445	0.916816	0.987206	1105.8	1109.53
Ace	2954.91	0.481513	0.16004	3.0087	0.00262368	0.0663748	315.341	441.139
Ace2	47.2515	-0.170777	0.23745	-0.719213	0.47201	0.862366	56.386	50.1227
Ace3	1.34779	-0.00940733	1.36334	-0.00690018	0.994494	NA	1.5186	1.60107
Acer1	1.25098	0.828335	1.66298	0.498102	0.618412	NA	0.491327	0.826575
Acer2	599.838	1.10568	0.0975674	11.3325	9.06165e-30	6.76819e-27	392.411	843.297
Acer3	727.192	-0.119546	0.102978	-1.16089	0.245687	0.710217	335.982	310.33
Ache	1431.44	0.0961005	0.20009	0.480286	0.631024	0.916845	1815.29	1940.37
Acin1	4836.01	-0.0619737	0.0727562	-0.8518	0.394325	0.820726	4364.14	4178.12
Ackr1	1049.1	0.321834	0.0836078	3.84933	0.000118442	0.00675553	899.849	1125.79
Ackr2	104.841	0.641544	0.137605	4.66221	3.12827e-06	0.000278789	128.762	199.781
Ackr3	465.43	0.020516	0.128134	0.160113	0.872792	0.976304	226.064	229.339
Ackr4	191.46	-0.288526	0.374421	-0.770591	0.440949	0.846464	11.9923	9.77194
Acly	12785.8	-0.0440427	0.0559824	-0.786724	0.431444	0.840923	6128.69	5944.45
Acmsd	4.49269	-0.0448538	0.647322	-0.0692913	0.944758	NA	4.70606	4.43952
Acn9	143.739	-0.143894	0.103691	-1.38771	0.165224	0.606133	206.061	187.149
Acnat1	58.2624	-1.17185	0.783314	-1.49602	0.134648	0.55607	3.52894	1.42141
Acnat2	4.61729	0.496545	0.722762	0.687009	0.492077	NA	3.55685	5.2972
Aco1	1296.76	-0.00453183	0.0470977	-0.0962219	0.923344	0.987979	1040.88	1037.83
Aco2	16670.7	0.00133576	0.0647159	0.0206403	0.983533	0.997804	20449	20467.2
Acot1	377.671	-0.131379	0.13278	-0.989443	0.322447	0.771582	284.735	261.211
Acot10	9.53567	0.398186	0.462582	0.86079	0.389354	NA	9.31895	12.5669
Acot11	1103.05	0.0211294	0.0937618	0.225352	0.821705	0.966434	1362.91	1382.61
Acot12	19.9953	-0.215802	0.418478	-0.515684	0.606075	0.9101	8.85017	7.2037
Acot13	887.089	0.08244	0.0795209	1.03671	0.299872	0.75515	1002.89	1061.44
Acot2	479.001	-0.0601907	0.1019	-0.590687	0.55473	0.891673	302.304	291.151
Acot3	90.1781	-0.0832226	0.18441	-0.45129	0.651781	0.923165	101.352	95.4902
Acot4	53.5092	0.207154	0.198291	1.0447	0.296163	0.75274	55.6853	64.1847
Acot5	111.621	0.0144479	0.173661	0.0831958	0.933696	0.989557	111.26	111.942
Acot6	116.029	-0.125196	0.159237	-0.786224	0.431736	0.840923	101.359	93.9096
Acot7	6357.09	-0.0852146	0.0924117	-0.922119	0.356466	0.794624	8935.43	8422.97
Acot8	519.533	-0.0073948	0.0758971	-0.0974318	0.922383	0.987979	473.273	471.512
Acot9	565.623	-0.10574	0.0846903	-1.24854	0.211832	0.67028	584.731	543.364
Acox1	5617.24	0.0549718	0.0390835	1.40652	0.15957	0.598625	5867.53	6096.5
Acox2	10.0968	-0.957714	0.830314	-1.15344	0.248732	NA	3.16329	1.58788
Acox3	927.203	0.190809	0.0773848	2.46572	0.013674	0.179464	919.888	1048.95
Acoxl	10.9689	0.666882	0.776381	0.858962	0.390361	NA	2.2952	3.55553
Acp1	905.702	0.0300219	0.0850004	0.353197	0.723941	0.94335	976.671	997.992
Acp2	2389.09	0.0316011	0.0571481	0.552969	0.580285	0.901814	2019.54	2067.35
Acp5	3770.44	-0.15276	0.246278	-0.620274	0.535078	0.884838	27.0922	24.2899
Acp6	451.904	-0.0449113	0.0981274	-0.457684	0.64718	0.921312	382.291	371.959
Acpp	31.535	0.152571	0.725598	0.21027	0.833457	0.968135	2.14534	2.26118
Acpt	2.22527	0.287046	1.18666	0.241894	0.808862	NA	1.44796	1.7145
Acr	18.7637	0.626645	0.298373	2.10021	0.0357104	0.307757	18.939	28.7199
Acrbp	228.736	0.0526822	0.173209	0.304155	0.76101	0.953415	196.335	203.29
Acrv1	0.169486	1.63968	5.19794	0.315449	0.752421	NA	0	0.480969
Acsbg1	3001.75	-0.00700551	0.268649	-0.0260768	0.979196	0.997041	4479.34	4457.67
Acsbg2	2.89066	-0.894319	1.09154	-0.819318	0.412605	NA	1.69862	0.931697
Acsf2	525.625	0.1327	0.0866386	1.53165	0.125608	0.540215	425.962	467.711
Acsf3	352.158	0.157332	0.0860158	1.82911	0.0673838	0.418719	363.043	406.401
Acsl1	1550.66	0.0997001	0.053017	1.88053	0.0600359	0.398383	1657.75	1778.83
Acsl3	3673.08	-0.118103	0.0849141	-1.39085	0.164271	0.605544	4928.41	4541.39
Acsl4	2677.58	-0.126698	0.0774505	-1.63586	0.10187	0.496836	3340.54	3059.28
Acsl5	2773.01	-0.0788814	0.0808887	-0.975184	0.329469	0.776076	2904.86	2749.47
Acsl6	3998.35	-0.0675491	0.0899698	-0.750798	0.452775	0.853039	5432.12	5182.38
Acsm1	0.626666	0.332311	2.72201	0.122083	0.902833	NA	0.204198	0.240484
Acsm2	0.489337	1.33127	3.72817	0.357084	0.721029	NA	0.204198	0.721453
Acsm3	7.25153	0.121892	0.669886	0.18196	0.855614	NA	3.41583	3.82319
Acsm4	12.8201	0.797406	1.15028	0.693231	0.488165	NA	3.6595	6.34688
Acsm5	3.24821	0.0238314	0.946954	0.0251664	0.979922	NA	2.14977	2.31849
Acss1	686.863	0.228229	0.108278	2.10781	0.0350473	0.304553	524.763	615.465
Acss2	1131.22	-0.0690144	0.076824	-0.898344	0.369002	0.80459	1497.4	1425.7
Acss2os	9.98717	-0.693914	0.486626	-1.42597	0.153877	NA	14.6513	9.15063
Acss3	131.538	0.546517	0.332673	1.64281	0.100423	0.493849	11.1755	16.7273
Acta1	221.239	-0.0319657	0.482948	-0.0661889	0.947227	0.991409	326.082	318.965
Acta2	2302.52	-0.0520678	0.155498	-0.334845	0.737742	0.947872	268.066	259.247
Actb	59650.2	0.0931475	0.0770542	1.20886	0.226718	0.688242	31484.8	33585
Actbl2	1.2951	-0.324525	1.33792	-0.242559	0.808347	NA	1.81989	1.44781
Actc1	8.27737	0.345807	1.67151	0.206883	NA	NA	0.693666	0.887921
Actg1	38576.2	0.0444968	0.0651493	0.682998	0.494608	0.870293	30866.5	31833.9
Actg2	107.153	1.42696	0.720778	1.97975	0.0477315	0.358115	1.65844	4.49212
Actl10	57.245	-0.163233	0.213359	-0.765063	0.444234	0.84857	119.288	106.26
Actl11	0.0686288	0	5.20139	0	1	NA	0	0
Actl6a	581.153	-0.151054	0.067253	-2.24605	0.0247008	0.251579	424.13	381.021
Actl6b	1982.8	0.0674588	0.331732	0.203353	0.838859	0.9699	2578.59	2702.01
Actl7a	1.1837	0.942713	1.3229	0.712611	0.476087	NA	1.00124	1.93348
Actl7b	1.29578	-1.21063	1.20897	-1.00138	0.316644	NA	2.81483	1.17655
Actl9	4.87822	-0.166469	0.664288	-0.250598	0.802125	NA	6.55799	5.65077
Actn1	4624.76	-0.12313	0.0744664	-1.65349	0.0982311	0.489066	4065.55	3730.9
Actn2	357.496	0.250153	0.390844	0.640034	0.522151	0.879243	311.022	370.054
Actn3	214.37	0.134823	0.201101	0.670426	0.502587	0.872861	35.0059	38.2954
Actn4	7539.67	-0.122847	0.0577166	-2.12846	0.0332991	0.294642	6879.18	6314.12
Actr10	3122.24	-0.0314393	0.0429191	-0.732526	0.463848	0.857914	3741.74	3659.2
Actr1a	6074.16	0.0200498	0.0377637	0.530928	0.595469	0.906525	7075.83	7174
Actr1b	6948.43	0.0369454	0.0607836	0.607818	0.543308	0.888312	10451.8	10721.1
Actr2	11621.8	-0.0841603	0.0771722	-1.09055	0.27547	0.73482	10483	9889.09
Actr3	9484.81	-0.0699763	0.0775627	-0.90219	0.366956	0.803011	6591.69	6279.71
Actr3b	2590.76	0.0802821	0.0833512	0.963179	0.335458	0.780661	2855	3018.75
Actr5	284.72	-0.120797	0.103957	-1.16199	0.245238	0.709995	254.371	233.506
Actr6	442.399	-0.0680261	0.094419	-0.72047	0.471236	0.861561	502.529	480.124
Actr8	1269.43	0.0937957	0.052611	1.78282	0.0746164	0.438008	1516.5	1620.21
Actrt1	0	NA	NA	NA	NA	NA	0	0
Actrt2	0.0532845	0	5.20139	0	1	NA	0	0
Actrt3	15.6408	0.408523	0.325148	1.25642	0.208964	NA	18.5329	24.74
Acvr1	1169.15	-0.209497	0.0757104	-2.76709	0.00565593	0.10714	910.32	785.722
Acvr1b	2738.72	0.192786	0.061614	3.12894	0.0017544	0.050759	3659.71	4183.78
Acvr1c	436.017	-0.161839	0.437657	-0.369784	0.711543	0.939401	751.139	671.434
Acvr2a	1329.95	0.0609344	0.100141	0.608489	0.542863	0.887885	1631.29	1704.73
Acvr2b	93.3313	0.253595	0.139258	1.82104	0.0686003	0.42174	102.849	123.376
Acvrl1	1309.88	0.142603	0.0950214	1.50075	0.133421	0.554567	425.15	467.677
Acy1	344.105	0.0664033	0.101008	0.657409	0.510918	0.875445	367.255	385.258
Acy3	69.9318	-0.127745	0.191185	-0.668175	0.504022	0.872975	72.5899	68.016
Acyp1	425.763	-0.0300948	0.123391	-0.243897	0.80731	0.963827	569.927	557.731
Acyp2	333.492	-0.0971988	0.102955	-0.944089	0.345124	0.789337	410.24	383.052
Ada	155.457	0.871048	0.270053	3.22547	0.00125764	0.0403398	14.5152	26.9233
Adad1	0.502693	2.0539	3.67041	0.559583	0.575764	NA	0	0.721453
Adad2	3.85084	-0.243452	0.918154	-0.265153	0.790891	NA	5.06798	4.36593
Adal	390.127	-0.00822652	0.0839195	-0.0980287	0.92191	0.987918	362.014	361.532
Adam10	2967.4	-0.0307144	0.0657549	-0.467104	0.640425	0.918785	2532.42	2478.8
Adam11	6246.93	0.0834692	0.136471	0.611628	0.540784	0.887588	7477.07	7922.07
Adam12	810.783	-0.0465835	0.131014	-0.35556	0.72217	0.94335	105.633	101.574
Adam15	5192.52	0.0965319	0.0617906	1.56224	0.118231	0.527355	3615.97	3864.87
Adam17	1362.26	-0.170763	0.0906159	-1.88447	0.0595008	0.396523	621.465	551.275
Adam18	1.34552	1.32723	1.36077	0.975353	0.329385	NA	0.550094	1.28167
Adam19	1228.93	-0.327805	0.0830984	-3.94478	7.98747e-05	0.00503146	1550.04	1232.62
Adam1a	265.65	-0.24217	0.133741	-1.81073	0.070182	0.424531	223.702	188.442
Adam1b	82.935	-0.35548	0.172174	-2.06466	0.0389556	0.323879	77.1741	59.5384
Adam2	1.31893	-0.0726491	1.23297	-0.0589219	0.953014	NA	1.20544	1.02328
Adam20	0	NA	NA	NA	NA	NA	0	0
Adam21	15.0516	-0.0497475	0.375243	-0.132574	0.89453	NA	19.179	18.6811
Adam22	5430.08	0.0283388	0.0725212	0.390766	0.69597	0.935816	7816.72	7970.96
Adam23	4016.95	0.139874	0.071515	1.95587	0.05048	0.367043	5550.8	6115.27
Adam24	0	NA	NA	NA	NA	NA	0	0
Adam25	0.0862329	0	5.20139	0	1	NA	0	0
Adam26a	0	NA	NA	NA	NA	NA	0	0
Adam26b	0.034033	-0.389024	5.20139	-0.0747923	0.94038	NA	0.204198	0
Adam28	1.98619	2.09012	1.57776	1.32475	0.185255	NA	0.264824	1.29487
Adam29	0.232811	1.93404	5.0312	0.38441	0.700674	NA	0	0.695584
Adam3	9.58855	0.336272	1.0636	0.316164	0.751878	NA	0.95849	1.29042
Adam30	0.476975	0	3.71915	0	1	NA	0	0
Adam32	11.9791	0.00805461	0.449661	0.0179126	0.985709	NA	8.34328	8.41564
Adam33	165.309	0.303146	0.186601	1.62456	0.104256	0.501367	112.641	139.382
Adam34	0.505413	0.332305	2.53415	0.13113	0.895672	NA	0.204198	0.30183
Adam39	0	NA	NA	NA	NA	NA	0	0
Adam4	9.13621	-0.263008	0.596686	-0.440782	0.659371	NA	10.6542	9.01516
Adam5	14.7634	1.71202	0.818782	2.09094	0.0365335	NA	1.26606	4.10299
Adam6a	0.0532845	0	5.20139	0	1	NA	0	0
Adam6b	1.36136	1.05366	2.02074	0.521422	0.602073	NA	0	0.345606
Adam7	0.913558	0.224797	1.59318	0.141099	0.887791	NA	1.4338	1.74989
Adam8	380.688	-0.130149	0.152766	-0.851945	0.394245	0.820675	183.464	167.731
Adam9	3045.83	-0.102228	0.0637146	-1.60446	0.108612	0.51115	2459.6	2290.55
Adamdec1	6.70511	3.11153	0.976476	3.18649	0.0014401	NA	0.756151	6.1979
Adamts1	1729.76	0.103266	0.169675	0.608607	0.542785	0.887885	424.625	456.191
Adamts10	1809.66	0.102979	0.0977517	1.05348	0.292123	0.749434	580.762	623.249
Adamts12	81.7202	0.151947	0.447264	0.339724	0.734064	0.946702	5.88407	6.84567
Adamts13	30.2936	-0.0139401	0.279876	-0.0498083	0.960275	0.993055	51.3855	51.0075
Adamts14	158.573	1.27756	0.466127	2.74079	0.00612908	0.112011	7.21891	17.6851
Adamts15	480.778	0.0591652	0.137146	0.431404	0.666174	0.92868	211.621	221.066
Adamts16	64.2449	-0.0335587	0.350499	-0.0957454	0.923723	0.988155	140.524	137.521
Adamts17	402.187	0.0471484	0.119553	0.394373	0.693306	0.935306	236.394	243.617
Adamts18	41.7781	0.19301	0.256888	0.751339	0.452449	0.853039	44.7978	51.5364
Adamts19	9.46642	-0.213887	0.851944	-0.251057	0.80177	NA	9.85443	8.43714
Adamts2	4304.24	-0.0114582	0.116789	-0.09811	0.921845	0.987918	474.509	472.575
Adamts20	462.537	-0.136364	0.202654	-0.672892	0.501016	0.872191	455.76	414.347
Adamts3	1041.8	0.0702116	0.0753921	0.931285	0.351706	0.791556	789.038	829.386
Adamts4	586.308	-0.289269	0.157593	-1.83554	0.0664251	0.41643	644.066	527.104
Adamts5	747.361	-0.241351	0.152032	-1.5875	0.1124	0.51764	116.483	99.6474
Adamts6	91.5985	-0.068874	0.216472	-0.318165	0.75036	0.951292	45.8069	44.9405
Adamts7	112.258	-0.0700451	0.267221	-0.262124	0.793226	0.95984	17.2973	16.9277
Adamts8	169.488	-0.0483662	0.135967	-0.35572	0.72205	0.94335	188.281	182.064
Adamts9	691.925	0.325222	0.175515	1.85295	0.063889	0.410569	91.3825	115.627
Adamtsl1	977.661	0.193098	0.161867	1.19294	0.232891	0.696057	105.662	122.355
Adamtsl2	194.567	0.122894	0.171909	0.714881	0.474682	0.86316	228.49	249.338
Adamtsl3	801.715	0.225427	0.171401	1.3152	0.188442	0.637396	58.3237	68.893
Adamtsl4	559.154	-0.28147	0.108418	-2.59616	0.00942718	0.145404	356.436	292.167
Adamtsl5	333.809	0.146429	0.102937	1.42251	0.154878	0.590487	261.404	287.486
Adap1	5291.51	0.055688	0.0808483	0.688797	0.490951	0.869419	8862.24	9209.19
Adap2	290.636	0.134691	0.199008	0.676811	0.498526	0.871456	98.7196	107.674
Adar	5558.66	0.12287	0.0570436	2.15396	0.031243	0.285433	6898.89	7511.82
Adarb1	6297.58	0.0254557	0.0674167	0.377588	0.705737	0.938416	7545.54	7678.96
Adarb2	487.605	0.126044	0.483234	0.260834	NA	NA	446.496	487.256
Adat1	194.642	-0.109713	0.110062	-0.996833	0.318846	0.769636	222.66	206.622
Adat2	152.605	-0.0181217	0.131698	-0.1376	0.890556	0.980443	181.794	179.323
Adat3	92.6358	-0.126019	0.196138	-0.6425	0.520549	0.878637	98.2374	90.2158
Adc	990.214	0.119694	0.0992788	1.20564	0.227957	0.689852	1310.48	1422.81
Adck1	903.5	0.0217988	0.0603571	0.361164	0.717977	0.942321	1124.74	1141.63
Adck2	738.125	0.0931334	0.0805685	1.15595	0.247701	0.712034	691.185	739.217
Adck3	1224.55	0.372033	0.101694	3.65834	0.00025385	0.0124426	1039.97	1346.95
Adck4	913.588	0.0676988	0.0662763	1.02146	0.307036	0.760798	785.202	824.049
Adck5	546.282	-0.0929049	0.079257	-1.1722	0.241118	0.706189	562.928	528.808
Adcy1	32348.4	-0.0263171	0.125326	-0.209989	0.833676	0.968158	39121.5	38413.2
Adcy10	22.99	-0.683464	0.320146	-2.13485	0.0327731	0.292859	63.4661	39.097
Adcy2	4642.34	-0.0198976	0.0643513	-0.309203	0.757167	0.953017	5898.89	5816.4
Adcy3	1636.72	-0.0703383	0.0755812	-0.930631	0.352044	0.791556	1980.04	1885.37
Adcy4	545.078	0.0151925	0.13878	0.109472	0.912828	0.986003	165.745	166.989
Adcy5	3217.27	0.0200941	0.116572	0.172375	0.863142	0.974813	4445.13	4508.83
Adcy6	2693.71	0.0653476	0.0721669	0.905506	0.365197	0.802386	2264.3	2368.12
Adcy7	870.294	0.23022	0.139129	1.65472	0.0979805	0.488942	229.87	270.002
Adcy8	703.939	-0.0469875	0.412935	-0.113789	NA	NA	1382.75	1338.41
Adcy9	4370.48	0.128931	0.0645051	1.99878	0.0456325	0.350341	4409.49	4819.37
[truncated: 22,064 more rows]
